# Supplementary material for: Optimization and Standardization of Thermal Treatment as a Plasma Prefractionation Method for Proteomic Analysis
Source: Biomed Res Int. 2019 Apr 30;2019:8646039. doi: 10.1155/2019/8646039 (PMC6515177; doi:10.1155/2019/8646039)
Supplement: Supplementary 2 — Supplementary Figure 1: full-length immunoblot results of HSA (69 kDa) and IgG HC (55 kDa) corresponding to a group of cropped blot images shown in Figure 3(b). Supplementary Figure 2: number of peptide spectrum matches (#PSMs) of serum albumin and immunoglobulins by LC-QTOF. Abbreviations: CPLL, combinatorial peptide ligand libraries; IMDP, immunodepletion; LC, liquid chromatography; QTOF, Quadrupole-Time Of Flight. Supplementary Figure 3: Venn diagram demonstrating the numbers of identified proteins in untreated and thermally treated plasma and bar graphs showing their predictive physical and chemical properties including molecular weight (MW), isoelectric point (pI), instability index, aliphatic index, and grand average of hydropathicity (GRAVY) index. A group of common proteins shared in both conditions was labelled by black color. [file 8646039.f2.xlsx]

## Sheet: Suppl table 1
Supplementary table 1. Recovery yield of plasma prefractionation by thermal treatment.
Sample	Untreated plasma			TS soluble fraction of thermal treatment			%Recovery yield
	Volume (µl)	Protein concentration (µg/µl)	Protein amount (µg)	Volume (µl)	Protein concentration (µg/µl)	Protein amount (µg)
Subject 1	300	77.3	23190	105	2.6	273	1.17723
Subject 2	300	80.7	24210	102	2.7	275.4	1.13755
Subject 3	300	82.7	24810	103	2.8	288.4	1.16243
Abbreviations: TS, thermostable.

## Sheet: Suppl table 2
Supplementary table 2. Coefficient of variation (CV) found with the numbers of the detected protein spots on 2-DE gels (n=3 subjects).
Condition	Numbers of detected protein spot in 2-DE			Mean	SD	%CV
	Subject 1	Subject 2	Subject 3
Untreated plasma	349	350	365	354.667	8.96289	2.52713
Thermal treatment	144	148	156	149.333	6.1101	4.09159
Abbreviations: 2-DE, two-dimensional electrophoresis.

## Sheet: Suppl table 3
Supplementary table 3. Total of 963 unique peptides identified at the peptide score>9 and the peptide FDR<1% by LC-QTOF.
uniprot_id	entry_name	sequence	peptide score	peptide FDR	protein_mw	protein_pI	relative intensity
							Thermal_1	Thermal_2	Thermal_3	Untreated_1	Untreated_2	Untreated_3	CPLL_1	CPLL_2	CPLL_3	IMDP_1	IMDP_2	IMDP_3
P01834	Ig kappa chain C region	(-)TVAAPSVFIFPPSDEQLK(S)	22.09	<0.1%	11779.8	5.58	4.36226e-05	6.76733e-05	6.43715e-05	0.000270574	0.000911166	0.000182001	0.000138713	2.37995e-05	0.000255621	0	3.27156e-05	0
P01834	Ig kappa chain C region	(K)SGTASVVCLLNNFYPR(E)	21.24	<0.1%	11779.8	5.58	0	5.56307e-05	2.83935e-05	0	0.000226315	0.000264292	0	0	4.0191e-05	0	3.52174e-05	0
P01857	Ig gamma-1 chain C region	(K)NQVSLTCLVK(G)	18.7	<0.1%	36618.7	8.92	0.000163479	0	0.000123492	0.00128793	0.000493958	0.000148965	0.000611648	0.000211612	8.14599e-05	0	3.11761e-05	0
P01876	Ig alpha-1 chain C region	(K)SGNTFRPEVHLLPPPSEELALNELVTLTCLAR(G)	18.62	<0.1%	38509.8	6.08	0	5.19007e-05	3.36443e-06	0	0.000158224	0	0	0	3.09517e-05	0	2.44405e-05	0
P02647	Apolipoprotein A-I	(K)AKPALEDLR(Q)	19.22	<0.1%	30777.3	5.56	0.00290958	0.000165187	0.000779848	0	8.91486e-06	1.61579e-05	0.000640775	0.000130265	9.45489e-05	0	0.00071782	8.28352e-05
P02647	Apolipoprotein A-I	(K)ATEHLSTLSEK(A)	23.2	<0.1%	30777.3	5.56	0.00318911	0.000101244	0.000785682	0	2.93226e-05	3.94637e-06	0.000320023	7.47512e-05	0.000218664	0	0.000255952	0.000673036
P02647	Apolipoprotein A-I	(K)DLATVYVDVLK(D)	22.48	<0.1%	30777.3	5.56	8.85157e-05	5.6057e-05	0.00131855	0	0.000320778	3.15949e-07	5.02426e-05	0	0.000277179	0	6.98575e-06	2.25407e-06
P02647	Apolipoprotein A-I	(K)LHELQEK(L)	16.34	<0.1%	30777.3	5.56	0.00153314	1.92896e-05	0.000598985	0	0.000111977	2.84114e-05	0.000140898	0	0.000232523	0	0.000184555	0.000287534
P02647	Apolipoprotein A-I	(K)LLDNWDSVTSTFSK(L)	27.35	<0.1%	30777.3	5.56	0.00376509	0.000352754	0.000336443	0	0.00031881	0.000219843	0.000374999	0.000194573	0.00226363	0	0.0038489	0.000161688
P02647	Apolipoprotein A-I	(K)LREQLGPVTQEFWDNLEKETEGLR(Q)	22.45	<0.1%	30777.3	5.56	0.000250724	0.000292008	0.000562035	0	5.39221e-05	0	0	0	5.20481e-05	0	0.000106615	0
P02647	Apolipoprotein A-I	(K)LSPLGEEMR(D)	23.45	<0.1%	30777.3	5.56	0.00323993	0.00056803	0.00100738	9.8489e-05	1.0135e-05	3.77818e-05	0.000699027	0.000136861	0.000117031	0.000119351	0.000448397	0.000259258
P02647	Apolipoprotein A-I	(K)VQPYLDDFQK(K)	20.43	<0.1%	30777.3	5.56	0.00753866	0.00141741	0.00153636	0	0.00027945	0.000107519	0.000626212	0.000289661	0.000609794	3.50891e-05	0.000671633	0.000361607
P02647	Apolipoprotein A-I	(K)VSFLSALEEYTK(K)	26	<0.1%	30777.3	5.56	0.00284182	0.00081208	0.00309216	0	0.000722241	5.01555e-05	0.000320023	0.000163243	0.00127656	0	0.00203992	0.000232576
P02647	Apolipoprotein A-I	(K)WQEEMELYR(Q)	19.3	<0.1%	30777.3	5.56	0.00223619	0.000100284	0.00119019	0	0.000100366	4.9735e-05	0.000189684	9.72865e-05	0.000218664	0	0.00109309	0.000160891
P02647	Apolipoprotein A-I	(R)DYVSQFEGSALGK(Q)	25.85	<0.1%	30777.3	5.56	0.00554811	9.16521e-05	0.00177751	2.48928e-05	0.000267643	0.000267896	0.000538833	0.000269874	0.000255621	3.80728e-05	0.000230934	0.000294304
P02647	Apolipoprotein A-I	(R)EQLGPVTQEFWDNLEK(E)	26.17	<0.1%	30777.3	5.56	0.000396415	0.000109769	0.00250874	0	0.000176723	9.55056e-06	0	0	0.000286419	0	0.000331005	4.57983e-05
P02647	Apolipoprotein A-I	(R)EQLGPVTQEFWDNLEKETEGLR(Q)	21.85	<0.1%	30777.3	5.56	0.000163902	0.000104547	0.00036367	0	3.38489e-05	0	0	0	7.66863e-05	0	4.67641e-05	2.86737e-05
P02647	Apolipoprotein A-I	(R)EQLGPVTQEFWDNLEKETEGLRQEMSK(D)	22.48	<0.1%	30777.3	5.56	0	0.000173713	0.000124659	0	2.69611e-05	0	0	0	3.78812e-05	0	9.98789e-05	0
P02647	Apolipoprotein A-I	(R)QGLLPVLESFK(V)	20.67	<0.1%	30777.3	5.56	0.00478578	8.05686e-05	0.00101905	0	0.000324713	0.000148965	0.0005716	0.000145655	0.000765323	0	0.000931434	0.000202707
P02647	Apolipoprotein A-I	(R)THLAPYSDELR(Q)	17.49	<0.1%	30777.3	5.56	0.002719	0.00042096	0.000688444	0	3.97528e-05	2.94926e-05	0.000768201	5.41397e-05	8.45397e-05	0	0.000798647	5.25685e-05
P02647	Apolipoprotein A-I	(R)VKDLATVYVDVLK(D)	24.95	<0.1%	30777.3	5.56	0.000341781	0.000469983	0.000606764	0	0.000176329	0	0	0	0.000660611	0	0.000290592	4.81878e-05
P02652	Apolipoprotein A-II	(K)EPCVESLVSQYFQTVTDYGK(D)	23.69	<0.1%	11288.9	6.27	0	0.000103908	0.000166082	0	7.59633e-05	1.53169e-05	0	0	9.93226e-05	0	0.000101996	8.76141e-05
P02652	Apolipoprotein A-II	(K)SKEQLTPLIK(K)	18.44	<0.1%	11288.9	6.27	7.66571e-05	3.48491e-07	8.88754e-05	0	0	2.33658e-05	0.000215169	0	0	0	0.000191098	0.000256869
P02671	Fibrinogen alpha chain	(K)DSDWPFCSDEDWNYK(C)	24.99	<0.1%	95713	5.7	0	0	2.25592e-05	0	5.15606e-05	0	3.93203e-05	9.17901e-05	9.02373e-05	0	3.86814e-05	4.73913e-05
P02671	Fibrinogen alpha chain	(K)EVVTSEDGSDCPEAMDLGTLSGIGTLDGFR(H)	31.25	<0.1%	95713	5.7	0	0	4.10344e-05	0	8.89518e-06	0	0	0	9.23931e-05	0	9.91092e-05	0
P02671	Fibrinogen alpha chain	(K)GLIDEVNQDFTNR(I)	23.48	<0.1%	95713	5.7	0	2.81351e-05	0.000111629	0.00010823	9.03294e-05	0.000139354	0.00211164	0.000972865	0.00384971	0.000284651	0.00144141	0.000649141
P02765	Alpha-2-HS-glycoprotein	(R)AQLVPLPPSTYVEFTVSGTDCVAK(E)	17.41	<0.1%	40122.7	5.43	0	5.3073e-05	4.45349e-05	0	1.2103e-05	0	0	0	2.92578e-05	0	5.15753e-05	0
P02768	Serum albumin	(K)ALVLIAFAQYLQQCPFEDHVK(L)	25.22	<0.1%	71362.3	5.92	0.000170679	3.93251e-05	7.17615e-05	0	0.000364073	1.69387e-05	0	0	2.24823e-05	0	9.64149e-06	0
P02768	Serum albumin	(K)AVmDDFAAFVEK(C)	26.33	<0.1%	71362.3	5.92	0.000309593	4.72115e-05	0	0.00106065	0.000368009	0.000138753	0.000221723	0.000129715	0.000338775	0	9.04491e-05	0
P02768	Serum albumin	(K)KVPQVSTPTLVEVSR(N)	23.33	<0.1%	71362.3	5.92	0.000270206	3.93251e-05	0.000113185	0.00221871	0.00125753	0.000445693	0.000189684	0.00021436	0.000126117	0	3.27156e-05	0
P02768	Serum albumin	(K)LVNEVTEFAK(T)	23.91	<0.1%	71362.3	5.92	0.000567517	9.12258e-05	0.000676776	0.00507056	0.00200732	9.91096e-05	0.000491503	0.000222055	9.3471e-05	0	1.68197e-05	4.18158e-05
P02768	Serum albumin	(K)SHCIAEVENDEMPADLPSLAADFVESK(D)	23.75	<0.1%	71362.3	5.92	0.000102915	5.29664e-05	0.00035978	0.00135287	0.000545125	2.16239e-05	0	0	0.000123653	0	8.92945e-05	0
P02768	Serum albumin	(K)VFDEFKPLVEEPQNLIK(Q)	29.7	<0.1%	71362.3	5.92	0.000279523	8.01423e-05	0.000106378	0.000941598	9.38717e-05	3.92234e-05	0.000107403	4.77089e-05	0.000184786	0	5.11904e-05	2.99481e-05
P02768	Serum albumin	(R)LVRPEVDVMCTAFHDNEETFLKK(Y)	21.88	<0.1%	71362.3	5.92	0.000212607	0.000128952	0.000180279	0.000633144	0.000180659	0.000110522	1.09223e-05	0	0.000251001	0	0.000132595	0
P02790	Hemopexin	(K)NFPSPVDAAFR(Q)	23.53	<0.1%	52417.1	6.55	4.13356e-05	0.000321848	0.000188447	0	0.000389656	0.000128542	0	0	1.60148e-05	0	0.00031561	5.73474e-05
P04264	Keratin, type II cytoskeletal 1	(R)SLDLDSIIAEVK(A)	20.05	<0.1%	66208.7	8.32	6.56456e-05	0	0	0	1.5783e-05	3.56194e-06	0	0	2.83339e-05	7.10136e-05	2.48254e-05	0
P0CG05	Ig lambda-2 chain C regions	(K)AAPSVTLFPPSSEELQANK(A)	20.68	<0.1%	11464.5	6.94	0	4.15632e-05	9.62655e-05	4.64305e-05	0.000200732	6.12678e-05	0.000180946	4.2927e-06	8.83894e-05	0	1.72623e-05	0
P10909	Clusterin	(K)LFDSDPITVTVPVEVSR(K)	21.66	<0.1%	53064.2	5.89	0	6.77799e-05	0.000142745	0	3.8572e-05	0	0	0	0.000589776	0	7.38989e-05	0
P10909	Clusterin	(R)ASSIIDELFQDR(F)	20.58	<0.1%	53064.2	5.89	0	2.88811e-05	6.0482e-05	0	5.90388e-05	9.19017e-06	0.000156553	3.03402e-05	0.000195565	0	5.44619e-05	0
P00450	Ceruloplasmin	(K)DIASGLIGPLIICK(K)	22.97	<0.1%	123059	5.44	0	0	0	0	9.38717e-05	2.16239e-05	1.56189e-05	0	0	0	0.000198218	4.26123e-05
P00450	Ceruloplasmin	(K)DLYSGLIGPLIVCR(R)	21.91	<0.1%	123059	5.44	0	0	0	0	8.59999e-06	0	0	0	8.11519e-05	0	6.38917e-06	0
P00450	Ceruloplasmin	(K)GAYPLSIEPIGVR(F)	19.47	<0.1%	123059	5.44	0	0	0	0	0.000117094	3.73013e-05	4.87862e-05	0	5.71297e-05	0	4.0221e-05	5.65509e-05
P00734	Prothrombin	(R)TATSEYQTFFNPR(T)	21.66	<0.1%	71519	5.64	0	0	0	0	2.2238e-05	7.20797e-06	0.000267596	4.55653e-05	0.00027102	0	8.54456e-05	0
P00747	Plasminogen	(K)VIPACLPSPNYVVADR(T)	21.61	<0.1%	93306	7.14	0	0	0	0	4.52631e-05	1.46562e-05	3.20387e-06	0	1.45519e-05	0	5.21526e-05	6.77018e-06
P01023	Alpha-2-macroglobulin	(K)ETTFNSLLCPSGGEVSEELSLK(L)	22.15	<0.1%	164714	6.03	0	0	0	0	4.80182e-05	0	0	2.18208e-05	0	0	0.000194369	0
P01023	Alpha-2-macroglobulin	(R)SLFTDLEAENDVLHCVAFAVPK(S)	23.57	<0.1%	164714	6.03	0	0	0	0	5.82516e-05	3.12946e-06	0	0.000170938	0	0	0.000382966	7.7658e-05
P01024	Complement C3	(K)SSLSVPYVIVPLK(T)	20.45	<0.1%	188685	6.02	0	0	0	0	0.000146023	1.88609e-05	0	0	2.37142e-05	6.86266e-05	0.000571562	0.000113102
P01024	Complement C3	(R)ILLQGTPVAQMTEDAVDAER(L)	26.61	<0.1%	188685	6.02	0	0	0	6.43967e-05	0.000188531	2.22246e-05	2.77062e-05	0	3.91131e-05	0.000278087	0.00063122	0.000188769
P01024	Complement C3	(R)LVAYYTLIGASGQR(E)	24	<0.1%	188685	6.02	0	0	0	0	8.65902e-05	2.4447e-05	0	0	2.17124e-05	2.3333e-05	0.000323308	7.80562e-05
P01024	Complement C3	(R)SNLDEDIIAEENIVSR(S)	25.85	<0.1%	188685	6.02	0	0	0	0	0.000164325	2.83514e-05	0	0.000113776	3.07977e-05	0	0.000458019	0.000135802
P01024	Complement C3	(R)VPVAVQGEDTVQSLTQGDGVAK(L)	27.5	<0.1%	188685	6.02	0	0	0	6.49378e-05	0.00013756	2.46873e-05	0	5.71627e-06	2.55621e-05	0.000426081	0.000227085	0.000288728
P01871	Ig mu chain C region	(K)LICQATGFSPR(Q)	23.29	<0.1%	49990.3	6.35	0	0	0	0.000139075	0	0	0.000473299	1.2257e-05	9.08532e-07	7.34006e-05	1.79166e-05	0
P01871	Ig mu chain C region	(K)NVPLPVIAELPPK(V)	21.04	<0.1%	49990.3	6.35	0	0	0	0.000173168	6.15972e-05	0	0.000396843	4.73241e-05	0.000119187	0.000107415	7.04349e-05	0
P01871	Ig mu chain C region	(K)VSVFVPPR(D)	19.5	<0.1%	49990.3	6.35	0	0	0	0.000106606	5.52997e-06	0	0.000289077	0	1.09794e-05	4.89934e-05	0	0
P01871	Ig mu chain C region	(K)YVTSAPMPEPQAPGR(Y)	21.19	<0.1%	49990.3	6.35	0	0	0	0.0001223	1.35592e-05	6.60731e-06	0.000513348	2.33048e-05	2.51001e-06	7.34006e-05	1.64156e-05	0
P02649	Apolipoprotein E	(R)GEVQAMLGQSTEELR(V)	25	<0.1%	36267.6	5.65	0	0	0	0	3.38489e-05	0	0.000167111	3.43526e-05	0.000277179	0	6.98575e-05	2.46514e-05
P02671	Fibrinogen alpha chain	(K)ALTDMPQMR(M)	18.63	<0.1%	95713	5.7	0	0	0	0.000162345	0	1.44159e-05	0.00208252	0.00042872	0.000186326	0.000460693	4.65717e-05	0.000109916
P02671	Fibrinogen alpha chain	(K)DSHSLTTNIMEILR(G)	25.61	<0.1%	95713	5.7	0	0	0	0	0.000174164	1.2614e-05	0.000637134	0.000209413	0.00151371	0	0.000606202	0.000148148
P02671	Fibrinogen alpha chain	(K)MKPVPDLVPGNFK(S)	20.86	<0.1%	95713	5.7	0	0	0	0.000142322	0.000195418	4.46294e-05	0.00174393	0.000344075	0.00133508	0.00044279	0.000731291	0.000352846
P02671	Fibrinogen alpha chain	(K)NSLFEYQK(N)	17.19	<0.1%	95713	5.7	0	0	0	0.00015098	0	0	0.001125	0.000288562	0	0.000330004	0	0
P02671	Fibrinogen alpha chain	(K)VQHIQLLQK(N)	18.06	<0.1%	95713	5.7	0	0	0	0	0	6.84757e-06	0.00167111	0.000305601	0.000101478	0.000318069	0.000187634	0.000263639
P02675	Fibrinogen beta chain	(K)APDAGGCLHADPDLGVLCPTGCQLQEALLQQERPIR(N)	21	<0.1%	56611.8	8.98	0	0	0	0	0	2.15038e-06	0	0	9.25471e-05	0	0.000180898	0
P02675	Fibrinogen beta chain	(K)DNENVVNEYSSELEK(H)	23.86	<0.1%	56611.8	8.98	0	0	0	8.82072e-05	9.11166e-05	6.90764e-05	0.00156553	0.00101684	0.00142285	0.000213041	0.000371419	0.000397051
P02675	Fibrinogen beta chain	(K)IRPFFPQQ(-)	15.22	0.003	56611.8	8.98	0	0	0	0	2.77482e-05	7.74857e-05	0.00121602	0.00085744	0.000779182	0.000221395	0.000598504	0.000285542
P02675	Fibrinogen beta chain	(K)LESDVSAQMEYCR(T)	25	<0.1%	56611.8	8.98	0	0	0	3.49582e-05	0	1.20133e-05	0.000542474	0.000104432	0.000278719	0.000119947	4.67641e-05	8.88089e-05
P02675	Fibrinogen beta chain	(K)NYCGLPGEYWLGNDK(I)	23.87	<0.1%	56611.8	8.98	0	0	0	0	8.85582e-05	6.36704e-06	8.11891e-05	3.60565e-05	0.000514322	0	0.000161269	0
P02675	Fibrinogen beta chain	(R)KGGETSEMYLIQPDSSVKPYR(V)	22.74	<0.1%	56611.8	8.98	0	0	0	0	4.07368e-05	3.88029e-05	0.000371358	0.00021491	0.000340315	0	6.58162e-05	0
P02675	Fibrinogen beta chain	(R)MGPTELLIEMEDWK(G)	25.2	<0.1%	56611.8	8.98	0	0	0	0	4.95926e-05	0	0	0	0.000139206	0	0.000133942	0
P02675	Fibrinogen beta chain	(R)SILENLR(S)	15.63	0.003	56611.8	8.98	0	0	0	0	0	1.77797e-05	0.00124878	0.000381451	4.91223e-05	4.76209e-05	1.38176e-05	0.000173237
P02675	Fibrinogen beta chain	(R)TPCTVSCNIPVVSGK(E)	26.7	<0.1%	56611.8	8.98	0	0	0	0.000114182	9.19037e-05	5.77239e-05	0.00225363	0.000742016	0.000919311	0.000481579	0.000162808	0.000669053
P02679	Fibrinogen gamma chain	(K)VAQLEAQCQEPCKDTVQIHDITGK(D)	21.57	<0.1%	52138.3	5.37	0	0	0	0.000148816	5.54965e-05	2.02424e-05	0	0.000314395	1.10718e-05	0.000118754	5.71562e-06	9.83668e-05
P02679	Fibrinogen gamma chain	(K)YEASILTHDSSIR(Y)	24.03	<0.1%	52138.3	5.37	0	0	0	0	2.83386e-05	1.88008e-05	0.00133616	0.000303402	0.000378812	9.30934e-05	8.87171e-05	0.000192353
P02679	Fibrinogen gamma chain	(R)TSTADYAMFK(V)	20.3	<0.1%	52138.3	5.37	0	0	0	0	0	2.59487e-05	0.000768201	9.83858e-05	0.000147983	1.8738e-05	1.9129e-05	0.000124651
P02679	Fibrinogen gamma chain	(R)VELEDWNGR(T)	18.66	<0.1%	52138.3	5.37	0	0	0	0	0	1.63981e-06	0.00023046	2.05016e-05	8.28458e-05	0	9.46829e-06	5.69492e-06
P02679	Fibrinogen gamma chain	(R)YLQEIYNSNNQK(I)	23.97	<0.1%	52138.3	5.37	0	0	0	0	0	6.24691e-06	0.00101941	0.000179733	3.27995e-05	9.84642e-05	0.000153764	0.000163679
P02751	Fibronectin	(R)NLQPASEYTVSLVAIK(G)	21.64	<0.1%	266214	5.46	0	0	0	0	4.23111e-06	0	3.13834e-05	0	0.000108716	0	8.42909e-05	0
P02760	Protein AMBP	(R)GECVPGEQEPEPILIPR(V)	21.88	<0.1%	39911.7	5.95	0	0	0	0	4.07368e-06	1.06318e-05	0	0	1.69387e-05	0	3.65645e-06	0
P04003	C4b-binding protein alpha chain	(K)EDVYVVGTVLR(Y)	20.14	<0.1%	69085.9	7.32	0	0	0	0	6.63203e-05	2.77507e-05	0.000176941	5.77123e-05	0.000155528	0	8.40985e-05	2.26602e-05
P04003	C4b-binding protein alpha chain	(K)LSLEIEQLELQR(D)	24.25	<0.1%	69085.9	7.32	0	0	0	0	0	9.00997e-06	0.000124514	3.94093e-05	0.000480444	0	6.06202e-05	0
P04003	C4b-binding protein alpha chain	(R)LMQCLPNPEDVK(M)	23.3	<0.1%	69085.9	7.32	0	0	0	0	0	8.70963e-06	0.000330946	0.000116524	0.000215584	0	0.000108924	0.000110314
P04004	Vitronectin	(R)DVWGIEGPIDAAFTR(I)	24.97	<0.1%	55103.4	5.55	0	0	0	0	1.77707e-05	4.09052e-06	2.84708e-05	9.23397e-05	0.000569757	0	3.1561e-05	0
P04004	Vitronectin	(R)FEDGVLDPDYPR(N)	20.65	<0.1%	55103.4	5.55	0	0	0	0	0	2.05427e-05	0.000560678	0.000100584	0.000140438	0	2.96365e-05	0.000123058
P04004	Vitronectin	(R)SIAQYWLGCPAPGHL(-)	23	<0.1%	55103.4	5.55	0	0	0	0	1.92073e-06	0	9.90288e-05	0	0.000548199	0	3.81041e-05	0
P04114	Apolipoprotein B-100	(K)IVQILPWEQNEQVK(N)	18.1	<0.1%	516964	6.59	0	0	0	0	3.16842e-05	8.82977e-06	1.66747e-05	0	1.95565e-05	0	9.52603e-05	2.72799e-05
P04114	Apolipoprotein B-100	(R)GIISALLVPPETEEAK(Q)	15.04	0.003	516964	6.59	0	0	0	0	0	8.5895e-06	0	0	1.89406e-05	0	2.73272e-05	4.42053e-05
P0C0L4	Complement C4-A	(K)GLCVATPVQLR(V)	20.68	<0.1%	194380	6.66	0	0	0	0	0	9.61063e-07	0	2.16559e-06	3.35695e-06	0	2.44405e-06	4.6993e-06
P0C0L4	Complement C4-A	(K)LNMGITDLQGLR(L)	23.3	<0.1%	194380	6.66	0	0	0	0	2.7945e-05	2.82312e-05	0.000363348	0.00021436	0.000254081	8.29486e-05	0.000100071	9.51808e-05
P0C0L4	Complement C4-A	(K)MRPSTDTITVMVENSHGLR(V)	20.95	<0.1%	194380	6.66	0	0	0	0	0	2.58286e-05	0.000339683	0.000146754	0.000346474	0	0	0.000105137
P0C0L4	Complement C4-A	(K)VLSLAQEQVGGSPEK(L)	24.47	<0.1%	194380	6.66	0	0	0	0	0	1.11123e-06	0.000120873	1.69289e-05	4.40407e-05	0	0	4.50018e-05
P0C0L4	Complement C4-A	(K)YVLPNFEVK(I)	20.64	<0.1%	194380	6.66	0	0	0	0	0	9.8509e-06	0.000308009	0.000186328	0.000169387	7.22071e-05	3.23308e-05	9.00036e-05
P0C0L4	Complement C4-A	(R)EPFLSCCQFAESLR(K)	22.85	<0.1%	194380	6.66	0	0	0	0	0	1.38753e-05	0	0	6.6985e-05	0	7.48611e-05	0
P0C0L4	Complement C4-A	(R)HLVPGAPFLLQALVR(E)	17.33	<0.1%	194380	6.66	0	0	0	0	0	1.5377e-05	0.000371358	0	0.000257161	0	1.39523e-05	0
P0C0L4	Complement C4-A	(R)LLATLCSAEVCQCAEGK(C)	27.5	<0.1%	194380	6.66	0	0	0	0	0	7.8687e-06	0.000256674	0.000118173	0.000147983	0	0.000104883	0.000155714
P0C0L4	Complement C4-A	(R)LTVAAPPSGGPGFLSIERPDSRPPR(V)	21.9	<0.1%	194380	6.66	0	0	0	0	0	4.63713e-05	0.000462377	0.000283615	0.000307977	0	7.005e-05	5.3365e-05
P0C0L4	Complement C4-A	(R)TTNIQGINLLFSSR(R)	25.24	<0.1%	194380	6.66	0	0	0	0	0	5.95859e-06	0.000197694	0.000161045	0.000451186	0	0.000109116	5.0179e-05
P0C0L4	Complement C4-A	(R)VTASDPLDTLGSEGALSPGGVASLLR(L)	30.75	<0.1%	194380	6.66	0	0	0	0	1.28508e-05	2.6189e-05	4.40533e-05	0	9.14692e-05	0	7.67855e-05	0.000104739
Q14624	Inter-alpha-trypsin inhibitor heavy chain H4	(R)LGVYELLLK(V)	23.45	<0.1%	103584	6.52	0	0	0	0	2.75514e-05	1.19532e-05	2.43203e-05	0	5.25101e-05	0	6.36993e-05	0
P01024	Complement C3	(K)DFDFVPPVVR(W)	17.25	<0.1%	188685	6.02	0	0	0	0	2.69611e-05	1.33948e-05	0	0	4.34248e-05	7.34006e-05	0.000168389	0.000105933
P08603	Complement factor H	(R)DTSCVNPPTVQNAYIVSR(Q)	20.73	<0.1%	143772	6.22	0	0	0	0	0	2.66695e-06	2.99635e-05	0	2.58701e-05	0	3.73343e-05	3.77537e-05
P02647	Apolipoprotein A-I	(K)DSGRDYVSQFEGSALGK(Q)	21.93	<0.1%	30777.3	5.56	0.000427755	0.000623447	0	0	0	0	0	6.70562e-05	3.9883e-05	0	0.000203992	0
P02647	Apolipoprotein A-I	(K)VQPYLDDFQKK(W)	20.22	<0.1%	30777.3	5.56	0.000253265	0.00016945	8.24577e-05	0	0	0	0.000117233	0	3.32615e-05	0	0.00012278	0
P02647	Apolipoprotein A-I	(R)LAEYHAK(A)	20.65	<0.1%	30777.3	5.56	0.00104186	1.90764e-05	0.000206144	0	0	0	0.000104854	5.46893e-05	0.000120881	0	0.000189943	0.000300278
P02652	Apolipoprotein A-II	(K)VKSPELQAEAK(S)	21.39	<0.1%	11288.9	6.27	9.86802e-05	2.04619e-06	6.14543e-05	0	0	0	0	0	5.71297e-05	0	0.00028097	0.000352846
P02656	Apolipoprotein C-III	(K)DALSSVQESQVAQQAR(G)	27.34	<0.1%	10852.1	5.23	9.10568e-05	6.66076e-05	5.48422e-05	0	0	0	6.88105e-06	0	2.7102e-06	0	2.73272e-05	3.83113e-05
P02656	Apolipoprotein C-III	(R)GWVTDGFSSLK(D)	17.99	<0.1%	10852.1	5.23	0	0.000146004	0	0	0	0	0	0	8.60796e-05	0	6.23522e-05	0
P02671	Fibrinogen alpha chain	(K)TFPGFFSPMLGEFVSETESR(G)	24.96	<0.1%	95713	5.7	0	5.00889e-05	2.46984e-05	0	0	0	0	0	8.0228e-05	0	8.27513e-05	0
P02671	Fibrinogen alpha chain	(K)TVIGPDGHK(E)	17.93	<0.1%	95713	5.7	4.40461e-05	2.80285e-05	4.39515e-05	0	0	0	0.000300363	0.000186878	0.000337235	0.000130092	8.00571e-05	0.000296693
P02765	Alpha-2-HS-glycoprotein	(K)EHAVEGDCDFQLLK(L)	21.05	<0.1%	40122.7	5.43	5.67517e-05	3.30374e-05	0.00011513	0	0	0	3.09101e-05	5.99109e-05	0.000100554	0	0.000275196	0.000176821
P06727	Apolipoprotein A-IV	(K)ALVQQMEQLR(Q)	22.83	<0.1%	45398.2	5.28	0.000448931	7.21494e-05	0.00019642	0	0	0	0	5.8262e-05	0.000153527	0	0.000119123	0
P06727	Apolipoprotein A-IV	(K)LVPFATELHER(L)	22.7	<0.1%	45398.2	5.28	0.000142726	5.01955e-05	3.1894e-05	0	0	0	5.78882e-05	0	5.12782e-05	0	3.17534e-05	0
P06727	Apolipoprotein A-IV	(R)DKVNSFFSTFK(E)	20.8	<0.1%	45398.2	5.28	0	0.000250445	0.000120186	0	0	0	6.08008e-05	0	0.000178627	0	5.63864e-05	0
P0C0L4	Complement C4-A	(R)ALEILQEEDLIDEDDIPVR(S)	25.38	<0.1%	194380	6.66	0	0	1.67055e-05	0	0	0	0	0	0.000337235	0	5.52317e-05	1.51732e-05
P00450	Ceruloplasmin	(K)DIFTGLIGPMK(I)	17.46	<0.1%	123059	5.44	0	0	0	0	0	0	0	0	2.14044e-05	0	3.75268e-05	0
P00450	Ceruloplasmin	(K)EVGPTNADPVCLAK(M)	20.78	<0.1%	123059	5.44	0	0	0	0	0	0	3.47329e-05	0	2.91038e-05	0	3.07912e-05	9.08001e-05
P00734	Prothrombin	(K)GQPSVLQVVNLPIVERPVCK(D)	23.56	<0.1%	71519	5.64	0	0	0	0	0	0	0.000557037	0.000194023	0.000160148	0	0	3.55634e-05
P00734	Prothrombin	(K)HQDFNSAVQLVENFCR(N)	25.1	<0.1%	71519	5.64	0	0	0	0	0	0	0.000133252	0.000140708	0.000255621	0	3.81041e-05	0
P00734	Prothrombin	(K)SPQELLCGASLISDR(W)	24.75	<0.1%	71519	5.64	0	0	0	0	0	0	0.000229732	4.23773e-05	0.000161688	0	5.92731e-05	0
P00734	Prothrombin	(R)ELLESYIDGR(I)	20.95	<0.1%	71519	5.64	0	0	0	0	0	0	0.000484222	0.00019952	9.73207e-05	0	9.44905e-05	0
P00734	Prothrombin	(R)SEGSSVNLSPPLEQCVPDR(G)	22.66	<0.1%	71519	5.64	0	0	0	0	0	0	0.000385921	0.000124769	0.000204805	0	1.33172e-05	0
P00747	Plasminogen	(R)FVTWIEGVMR(N)	21.35	<0.1%	93306	7.14	0	0	0	0	0	0	0	0	5.80537e-06	0	4.83037e-05	0
P00747	Plasminogen	(R)WELCDIPR(C)	16.57	<0.1%	93306	7.14	0	0	0	0	0	0	0	0	3.12597e-05	0	0.000100841	0
P01042	Kininogen-1	(R)DIPTNSPELEETLTHTITK(L)	28.17	<0.1%	73040.1	6.34	0	0	0	0	0	0	1.55097e-05	0	0	0	0.000196294	0
P02649	Apolipoprotein E	(K)SELEEQLTPVAEETR(A)	23.22	<0.1%	36267.6	5.65	0	0	0	0	0	0	0.000206067	6.4308e-05	0.000110872	3.17472e-05	6.29295e-05	5.93387e-05
P02649	Apolipoprotein E	(K)SWFEPLVEDMQR(Q)	24.29	<0.1%	36267.6	5.65	0	0	0	0	0	0	0	0	7.08347e-05	0	7.33215e-06	0
P02649	Apolipoprotein E	(R)AATVGSLAGQPLQER(A)	22.73	<0.1%	36267.6	5.65	0	0	0	0	0	0	0.000195145	2.96806e-05	7.26826e-05	6.98201e-05	0	1.96734e-05
P02649	Apolipoprotein E	(R)LGPLVEQGR(V)	15.8	<0.1%	36267.6	5.65	0	0	0	0	0	0	0.000268688	0	0	4.06985e-05	0	0
P02671	Fibrinogen alpha chain	(K)ESSSHHPGIAEFPSR(G)	19.79	<0.1%	95713	5.7	0	0	0	0	0	0	0.000357523	0.000109379	6.88329e-05	0	7.1782e-05	0
P02671	Fibrinogen alpha chain	(K)VPPEWK(A)	16.27	<0.1%	95713	5.7	0	0	0	0	0	0	0.000830094	0.000151701	6.12874e-05	0.000250039	4.23379e-05	0.000125448
P02671	Fibrinogen alpha chain	(R)EVDLKDYEDQQK(Q)	22.13	<0.1%	95713	5.7	0	0	0	0	0	0	0.00156917	0.000374306	8.17679e-05	0	0.000172623	0.0002497
P02671	Fibrinogen alpha chain	(R)GGSTSYGTGSETESPR(N)	23.9	<0.1%	95713	5.7	0	0	0	0	0	0	0.000329489	0.000151151	0.000160148	0.000128302	2.4633e-05	8.48264e-05
P02671	Fibrinogen alpha chain	(R)MELERPGGNEITR(G)	15.83	<0.1%	95713	5.7	0	0	0	0	0	0	0.00179126	0.000211612	0	0.000359245	0.000181476	0
P02671	Fibrinogen alpha chain	(R)NPSSAGSWNSGSSGPGSTGNR(N)	27.87	<0.1%	95713	5.7	0	0	0	0	0	0	0.000389562	9.45383e-05	0.000106098	0	0	0.000163281
P02675	Fibrinogen beta chain	(K)AHYGGFTVQNEANK(Y)	21.84	<0.1%	56611.8	8.98	0	0	0	0	0	0	0.000586163	6.76059e-05	8.46937e-05	0	0.000111618	8.76141e-05
P02675	Fibrinogen beta chain	(K)EDGGGWWYNR(C)	20.35	<0.1%	56611.8	8.98	0	0	0	0	0	0	0.000152548	9.12404e-05	0.000142901	0	8.29438e-05	2.99083e-05
P02675	Fibrinogen beta chain	(K)GGETSEMYLIQPDSSVKPYR(V)	23.94	<0.1%	56611.8	8.98	0	0	0	0	0	0	0.000284344	0.000167641	0.000346474	2.23782e-05	0.00013221	0
P02675	Fibrinogen beta chain	(K)HGTDDGVVWMNWK(G)	22.45	<0.1%	56611.8	8.98	0	0	0	0	0	0	0	0	0.000177087	0	0.000125089	0
P02675	Fibrinogen beta chain	(K)HQLYIDETVNSNIPTNLR(V)	24.32	<0.1%	56611.8	8.98	0	0	0	0	0	0	0	0.000111028	0.00039883	0	0.000202067	3.62802e-05
P02675	Fibrinogen beta chain	(K)QGFGNVATNTDGK(N)	22.33	<0.1%	56611.8	8.98	0	0	0	0	0	0	0.000546115	0.000101684	6.85249e-05	0	0.000151454	0.000230186
P02675	Fibrinogen beta chain	(R)EEAPSLRPAPPPISGGGYR(A)	22.82	<0.1%	56611.8	8.98	0	0	0	0	0	0	0	0.000418827	0.000152449	9.30934e-05	0	8.88089e-05
P02675	Fibrinogen beta chain	(R)KAPDAGGCLHADPDLGVLCPTGCQLQEALLQQERPIR(N)	20.51	<0.1%	56611.8	8.98	0	0	0	0	0	0	5.02426e-05	0	0.000599015	0	7.02424e-05	0.000133811
P02675	Fibrinogen beta chain	(R)NSVDELNNNVEAVSQTSSSSFQYMYLLK(D)	21.22	<0.1%	56611.8	8.98	0	0	0	0	0	0	0	0.000230849	4.18849e-05	0	4.00286e-05	0
P02675	Fibrinogen beta chain	(R)QDGSVDFGR(K)	15.56	0.002	56611.8	8.98	0	0	0	0	0	0	0.000330581	4.80386e-05	3.31075e-05	0	6.19673e-05	0.00019992
P02675	Fibrinogen beta chain	(R)TMTIHNGMFFSTYDRDNDGWLTSDPR(K)	20.74	<0.1%	56611.8	8.98	0	0	0	0	0	0	0	0	7.9766e-05	0	4.86886e-05	0
P02679	Fibrinogen gamma chain	(K)AIQLTYNPDESSKPNMIDAATLK(S)	25.72	<0.1%	52138.3	5.37	0	0	0	0	0	0	0.00132524	0.000132464	0.000371112	0	0.000321383	9.31896e-05
P02679	Fibrinogen gamma chain	(K)EGFGHLSPTGTTEFWLGNEK(I)	23.75	<0.1%	52138.3	5.37	0	0	0	0	0	0	0.000132888	0	0.000206345	0	0.000130478	8.60212e-05
P02679	Fibrinogen gamma chain	(K)IHLISTQSAIPYALR(V)	20.17	<0.1%	52138.3	5.37	0	0	0	0	0	0	0.00176941	0.000354519	2.37142e-05	0	3.09836e-05	0.00023616
P02679	Fibrinogen gamma chain	(K)QSGLYFIKPLK(A)	21.78	<0.1%	52138.3	5.37	0	0	0	0	0	0	0.00071359	0.000187428	0.000622113	0	0.000814042	0.000175627
P02679	Fibrinogen gamma chain	(K)VGPEADKYR(L)	22.36	<0.1%	52138.3	5.37	0	0	0	0	0	0	0.000333858	6.48577e-05	0.000525101	0	0.000102766	0.000186379
P02679	Fibrinogen gamma chain	(R)DNCCILDER(F)	18.33	<0.1%	52138.3	5.37	0	0	0	0	0	0	0.000881065	0.000179733	3.68032e-05	0.000100254	0	6.81001e-05
P02679	Fibrinogen gamma chain	(R)LTIGEGQQHHLGGAK(Q)	25.37	<0.1%	52138.3	5.37	0	0	0	0	0	0	0.000604367	8.35455e-05	0.00067447	0	0.000198218	0.000212663
P02747	Complement C1q subcomponent subunit C	(K)FQSVFTVTR(Q)	16.35	<0.1%	26001.4	9	0	0	0	0	0	0	0.000219174	0.000116524	6.05175e-05	0	5.50393e-05	8.44282e-05
P02747	Complement C1q subcomponent subunit C	(R)FNAVLTNPQGDYDTSTGK(F)	19.39	<0.1%	26001.4	9	0	0	0	0	0	0	0.000251941	0.000134662	0.000129042	0	1.88789e-05	0
P02748	Complement component C9	(K)LSPIYNLVPVK(M)	19.51	<0.1%	64655.7	5.43	0	0	0	0	0	0	0	0	1.92486e-05	0	1.31247e-05	0
P02748	Complement component C9	(R)AIEDYINEFSVR(K)	21.29	<0.1%	64655.7	5.43	0	0	0	0	0	0	0	0	2.07884e-05	0	1.47798e-05	0
P02751	Fibronectin	(K)EINLAPDSSSVVVSGLMVATK(Y)	17.23	<0.1%	266214	5.46	0	0	0	0	0	0	0	0	3.83431e-05	0	3.54099e-06	0
P02751	Fibronectin	(K)WLPSSSPVTGYR(V)	16.69	<0.1%	266214	5.46	0	0	0	0	0	0	6.99027e-05	0	2.47921e-05	0	8.42909e-05	5.89404e-05
P02751	Fibronectin	(R)EESPLLIGQQSTVSDVPR(D)	20.67	<0.1%	266214	5.46	0	0	0	0	0	0	2.94174e-05	0	2.6794e-05	0	3.79117e-05	0
P02751	Fibronectin	(R)ITYGETGGNSPVQEFTVPGSK(S)	20.52	<0.1%	266214	5.46	0	0	0	0	0	0	2.49028e-05	0	2.91038e-05	0	2.71347e-05	0
P02751	Fibronectin	(R)SSPVVIDASTAIDAPSNLR(F)	23.75	<0.1%	266214	5.46	0	0	0	0	0	0	0	0	6.57531e-05	0	8.52531e-05	0
P02751	Fibronectin	(R)TYLGNALVCTCYGGSR(G)	15.95	<0.1%	266214	5.46	0	0	0	0	0	0	2.02791e-05	0	1.50755e-06	0	1.94369e-06	0
P04003	C4b-binding protein alpha chain	(K)CEWETPEGCEQVLTGK(R)	25.67	<0.1%	69085.9	7.32	0	0	0	0	0	0	7.93687e-05	2.12711e-05	0.000100247	0	4.23379e-05	0
P04003	C4b-binding protein alpha chain	(R)FSAICQGDGTWSPR(T)	25.07	<0.1%	69085.9	7.32	0	0	0	0	0	0	0.000236286	5.49641e-05	0.000123499	0	5.21526e-05	4.42053e-05
P04003	C4b-binding protein alpha chain	(R)TWYPEVPK(C)	14.95	0.001	69085.9	7.32	0	0	0	0	0	0	0.000224271	7.91483e-05	9.20851e-05	0	1.89558e-05	0
P04003	C4b-binding protein alpha chain	(R)WTPYQGCEALCCPEPK(L)	27.43	<0.1%	69085.9	7.32	0	0	0	0	0	0	0.000120873	0	0.000161688	0	5.98504e-05	0
P04004	Vitronectin	(R)DWHGVPGQVDAAMAGR(I)	23.1	<0.1%	55103.4	5.55	0	0	0	0	0	0	0.000180946	5.23258e-05	0.000246382	0	0.000105845	0
P04114	Apolipoprotein B-100	(K)GFEPTLEALFGK(Q)	21.36	<0.1%	516964	6.59	0	0	0	0	0	0	0	0	2.00185e-05	0	1.80898e-05	0
P04114	Apolipoprotein B-100	(K)IEIPLPFGGK(S)	21.06	<0.1%	516964	6.59	0	0	0	0	0	0	1.45267e-05	0	1.70927e-05	0	5.5809e-05	4.42053e-05
P04114	Apolipoprotein B-100	(K)SVSLPSLDPASAK(I)	19.94	<0.1%	516964	6.59	0	0	0	0	0	0	1.68203e-06	0	0	7.34006e-05	1.25667e-05	0.00010673
P04114	Apolipoprotein B-100	(R)TLADLTLLDSPIK(V)	17.89	<0.1%	516964	6.59	0	0	0	0	0	0	3.10921e-06	0	0	0	0	3.72758e-06
P05090	Apolipoprotein D	(K)NILTSNNIDVK(K)	17.75	<0.1%	21560.4	5.06	0	0	0	0	0	0	0.000111771	4.23224e-05	7.88421e-05	0	3.8489e-05	0
P05090	Apolipoprotein D	(R)NPNLPPETVDSLK(N)	21.28	<0.1%	21560.4	5.06	0	0	0	0	0	0	0.000109951	2.71523e-05	8.16139e-05	0	4.73415e-05	2.30186e-05
P08603	Complement factor H	(K)CFEGFGIDGPAIAK(C)	17.51	<0.1%	143772	6.22	0	0	0	0	0	0	0	0	9.91686e-06	0	4.46472e-06	0
P08603	Complement factor H	(K)SSNLIILEEHLK(N)	20.14	<0.1%	143772	6.22	0	0	0	0	0	0	2.45752e-05	0	9.47029e-05	0	0.000105652	3.57625e-05
P08603	Complement factor H	(K)TDCLSLPSFENAIPMGEK(K)	16.33	<0.1%	143772	6.22	0	0	0	0	0	0	0	0	7.31445e-05	0	8.06344e-05	0
P08603	Complement factor H	(K)VSVLCQENYLIQEGEEITCK(D)	24	<0.1%	143772	6.22	0	0	0	0	0	0	0	0	3.49554e-05	0	7.48611e-05	3.25367e-05
P08603	Complement factor H	(R)ECDTDGWTNDIPICEVVK(C)	20.4	<0.1%	143772	6.22	0	0	0	0	0	0	0	0	4.81984e-05	0	3.98361e-05	0
P08603	Complement factor H	(R)WQSIPLCVEK(I)	14.26	0.005	143772	6.22	0	0	0	0	0	0	7.31794e-05	0	4.95843e-05	0	0.000110079	0
P0C0L4	Complement C4-A	(K)AEFQDALEK(L)	17.5	<0.1%	194380	6.66	0	0	0	0	0	0	0.00038228	0.000101134	0	0.000150978	0	3.52448e-05
P0C0L4	Complement C4-A	(K)KYVLPNFEVK(I)	17.88	<0.1%	194380	6.66	0	0	0	0	0	0	0.000230096	0.000113226	0.000107022	0	6.17748e-05	0
P0C0L4	Complement C4-A	(K)LELSVDGAK(Q)	16.03	<0.1%	194380	6.66	0	0	0	0	0	0	0.000170752	2.57232e-05	0	8.05616e-05	0	0
P0C0L4	Complement C4-A	(K)VDFTLSSER(D)	17.8	<0.1%	194380	6.66	0	0	0	0	0	0	0.000245752	3.39678e-05	3.20296e-05	0	1.68197e-05	4.34088e-05
P0C0L4	Complement C4-A	(R)DFALLSLQVPLK(D)	22.9	<0.1%	194380	6.66	0	0	0	0	0	0	4.15047e-05	0	9.3779e-05	0	1.06807e-05	0
P0C0L4	Complement C4-A	(R)DFALLSLQVPLKDAK(S)	19.77	<0.1%	194380	6.66	0	0	0	0	0	0	6.29852e-05	2.62728e-05	7.36065e-05	0	3.07912e-05	0
P0C0L4	Complement C4-A	(R)EMSGSPASGIPVK(V)	21.14	<0.1%	194380	6.66	0	0	0	0	0	0	0.000542474	0.000117623	0	0.000149188	0	0
P0C0L4	Complement C4-A	(R)FGLLDEDGKK(T)	21.46	<0.1%	194380	6.66	0	0	0	0	0	0	0.000436892	0.000143456	1.77087e-05	0.000118157	0	7.4472e-05
P0C0L4	Complement C4-A	(R)GLEEELQFSLGSK(I)	23.97	<0.1%	194380	6.66	0	0	0	0	0	0	0	0	0.000130582	0	1.77627e-05	0
P0C0L4	Complement C4-A	(R)GPEVQLVAHSPWLK(D)	22.9	<0.1%	194380	6.66	0	0	0	0	0	0	0.000239198	0.000203917	0.000421928	0	7.48611e-05	0
P0C0L4	Complement C4-A	(R)GQIVFMNR(E)	16.09	0.006	194380	6.66	0	0	0	0	0	0	0.000198786	8.5744e-05	2.54081e-05	7.69811e-05	0	3.19792e-05
P0C0L4	Complement C4-A	(R)GSFEFPVGDAVSK(V)	22.4	<0.1%	194380	6.66	0	0	0	0	0	0	0.000234829	0.000147853	0.000203265	0	0	9.19948e-05
P0C0L4	Complement C4-A	(R)STQDTVIALDALSAYWIASHTTEER(G)	23.02	<0.1%	194380	6.66	0	0	0	0	0	0	0	0	9.25471e-05	0	6.10051e-05	0
P0C0L4	Complement C4-A	(R)TLEIPGNSDPNMIPDGDFNSYVR(V)	20.43	<0.1%	194380	6.66	0	0	0	0	0	0	0	0	9.19311e-05	0	3.56023e-05	1.66865e-05
P0C0L4	Complement C4-A	(R)VDVQAGACEGK(L)	18.6	<0.1%	194380	6.66	0	0	0	0	0	0	4.98785e-05	3.63313e-05	1.3628e-05	0	0	2.79569e-05
P0C0L4	Complement C4-A	(R)VGDTLNLNLR(A)	21.5	<0.1%	194380	6.66	0	0	0	0	0	0	0.000346965	0.000236895	0.000134586	0.000155752	3.86814e-05	0.000227399
P0C0L4	Complement C4-A	(R)YIYGKPVQGVAYVR(F)	24.81	<0.1%	194380	6.66	0	0	0	0	0	0	0.000270873	1.11577e-05	0.000148137	0	4.17606e-05	0
P0C0L5	Complement C4-B	(K)AEMADQAAAWLTR(Q)	23.02	<0.1%	194288	6.91	0	0	0	0	0	0	3.8228e-05	0	0.000183246	0	0.000100456	2.32576e-05
P27169	Serum paraoxonase/arylesterase 1	(K)YVYIAELLAHK(I)	21.12	<0.1%	39901.7	5.08	0	0	0	0	0	0	0.000128883	0	0.000220204	0	2.79045e-05	0
P27169	Serum paraoxonase/arylesterase 1	(R)EVQPVELPNCNLVK(G)	21.98	<0.1%	39901.7	5.08	0	0	0	0	0	0	0.0002858	0.000105531	0.000198645	0	6.90878e-06	0
P35542	Serum amyloid A-4 protein	(K)EALQGVGDMGR(A)	20.94	<0.1%	14860.5	9.43	0	0	0	0	0	0	0.000171116	2.33048e-05	0	0.000157543	0	1.97928e-05
Q14624	Inter-alpha-trypsin inhibitor heavy chain H4	(K)SPEQQETVLDGNLIIR(Y)	18.65	<0.1%	103584	6.52	0	0	0	0	0	0	0	0	4.51186e-05	0	7.62082e-05	0
Q14624	Inter-alpha-trypsin inhibitor heavy chain H4	(R)ANTVQEATFQMELPK(K)	18.99	<0.1%	103584	6.52	0	0	0	0	0	0	0	0	4.41947e-06	0	5.86957e-06	0
Q15166	Serum paraoxonase/lactonase 3	(K)ILIGTVFHK(T)	21.21	<0.1%	39835	5.24	0	0	0	0	0	0	0.000251213	0	0.000186326	0	2.15538e-05	0
Q6ZNG9	KRAB-A domain-containing protein 2	(R)FmQmVRNQAFDVSLQQSPFEAMFGYK(A)	17.67	0.004	56546.2	5.67	0	0	0	0	0	0	0	0	3.86511e-05	0	0	0.000633211
P00738	Haptoglobin	(K)VTSIQDWVQK(T)	23.02	<0.1%	45889.1	6.13	0	8.36592e-06	4.35626e-05	0	9.66268e-05	0.000109321	0	0	0	0	0.000846758	0.00072879
P00738	Haptoglobin	(K)YVMLPVADQDQCIR(H)	23.25	<0.1%	45889.1	6.13	0	0.000119361	0	0	7.53729e-05	4.18663e-05	0	0	0	0	0.000452246	0.000262842
P00739	Haptoglobin-related protein	(K)DIAPTLTLYVGK(K)	21.36	<0.1%	39542.3	6.64	0	4.26289e-05	0.000110268	0	0.000271579	5.92255e-05	0	0	0	0	0.000232858	7.6065e-05
P00739	Haptoglobin-related protein	(K)GSFPWQAK(M)	18.97	<0.1%	39542.3	6.64	0	0	4.12289e-05	0	4.27047e-05	3.83224e-05	0	0	0	0	3.77192e-05	9.35878e-05
P00739	Haptoglobin-related protein	(K)SCAVAEYGVYVK(V)	20.18	<0.1%	39542.3	6.64	0	0	3.42277e-05	0	5.92356e-05	5.94057e-05	0	0	0	0	0.000171084	0.000281958
P00739	Haptoglobin-related protein	(R)VMPICLPSK(N)	18.07	<0.1%	39542.3	6.64	4.2352e-06	1.80107e-05	6.02875e-05	0	0.000100169	0.000112925	0	0	0	0	0.000203992	0.000457983
P01008	Antithrombin-III	(K)EQLQDMGLVDLFSPEK(S)	24.17	<0.1%	53057.9	6.32	0	2.03553e-05	6.51494e-05	0	2.65675e-05	4.4329e-06	0	0	0	0	8.40985e-05	3.02667e-05
P01008	Antithrombin-III	(R)DIPMNPMCIYR(S)	22.4	<0.1%	53057.9	6.32	1.68137e-05	8.0462e-05	0.000125048	0	5.82516e-05	2.48675e-05	0	0	0	0	0.000125474	0
P01008	Antithrombin-III	(R)EVPLNTIIFMGR(V)	22.95	<0.1%	53057.9	6.32	3.3331e-05	0.000109769	8.28467e-05	0	0	3.24359e-05	0	0	0	0	0.000188981	4.73913e-05
P01008	Antithrombin-III	(R)VAEGTQVLELPFK(G)	23.37	<0.1%	53057.9	6.32	0	5.58438e-05	0.000105406	0	0	1.55572e-05	0	0	0	0	4.96508e-05	2.79171e-05
P01009	Alpha-1-antitrypsin	(K)DTEEEDFHVDQVTTVK(V)	22.87	<0.1%	46906.8	5.37	8.85157e-05	4.2096e-05	3.2283e-05	0	8.38351e-05	1.95216e-05	0	0	0	0	0.00022901	0.000125448
P01009	Alpha-1-antitrypsin	(K)GTEAAGAMFLEAIPMSIPPEVK(F)	21.5	<0.1%	46906.8	5.37	5.33635e-05	4.55063e-05	0.000165888	0	2.9913e-05	5.31588e-06	0	0	0	0	0.000211689	9.23931e-05
P01009	Alpha-1-antitrypsin	(K)KLSSWVLLMK(Y)	17.44	<0.1%	46906.8	5.37	0	8.47249e-05	0	0	0.000192467	3.49587e-05	0	0	0	0	0.000394512	0
P01009	Alpha-1-antitrypsin	(K)LQHLENELTHDIITK(F)	19.47	<0.1%	46906.8	5.37	0.000214301	3.41031e-05	0.000145468	6.16909e-05	0	0.000106918	0	0	0	0	0.000160884	0
P01009	Alpha-1-antitrypsin	(K)LSITGTYDLK(S)	22.91	<0.1%	46906.8	5.37	0.00016729	0.000134281	0.000233371	3.84215e-05	6.57299e-05	6.30698e-05	0	0	0	0	0.000121433	0.000219832
P01009	Alpha-1-antitrypsin	(K)LSSWVLLMK(Y)	22.33	<0.1%	46906.8	5.37	0	0	9.04312e-05	0	0	4.53502e-05	0	0	0	0	0.000124704	0
P01009	Alpha-1-antitrypsin	(K)SVLGQLGITK(V)	19.96	<0.1%	46906.8	5.37	0.000376509	0.000107638	0	0	8.91486e-05	0	0	0	0	0.000142624	0.000748611	0.000406211
P01009	Alpha-1-antitrypsin	(K)VFSNGADLSGVTEEAPLK(L)	28.75	<0.1%	46906.8	5.37	3.71427e-05	0.000135347	0.000208089	0	0.000269611	0.00010812	0	0	0	0	0.000602353	0.000135802
P01011	Alpha-1-antichymotrypsin	(K)AVLDVFEEGTEASAATAVK(I)	26.56	<0.1%	47821.2	5.33	0	5.73358e-07	1.68805e-06	0	6.71074e-06	1.98219e-06	0	0	0	0	0.000176087	3.92671e-05
P01042	Kininogen-1	(K)ENFLFLTPDCK(S)	18.04	<0.1%	73040.1	6.34	0	2.86679e-05	5.09526e-05	0	9.11166e-05	9.00997e-06	0	0	0	0	4.81112e-05	0
P02763	Alpha-1-acid glycoprotein 1	(K)EQLGEFYEALDCLR(I)	24.66	<0.1%	23739.3	4.93	0.000258771	0.000911192	0.0013555	0	2.91258e-05	1.36351e-05	0	0	0	0	0.00010546	4.42053e-05
P02763	Alpha-1-acid glycoprotein 1	(K)SDVVYTDWK(K)	21.24	<0.1%	23739.3	4.93	0.00122821	0.000267496	0.00113963	0	0	2.18041e-05	0	0	0	0	1.33172e-05	5.73474e-05
P02763	Alpha-1-acid glycoprotein 1	(K)TEDTIFLR(E)	18.46	<0.1%	23739.3	4.93	0.00155855	0.000262168	0.00198365	0	0	3.93435e-05	0	0	0	0	5.56166e-06	6.13299e-06
P02763	Alpha-1-acid glycoprotein 1	(K)WFYIASAFR(N)	17.21	<0.1%	23739.3	4.93	0.000111809	0.000115098	0.000180668	0	1.59405e-05	2.10233e-05	0	0	0	0	7.85176e-05	0
P02763	Alpha-1-acid glycoprotein 1	(R)YVGGQEHFAHLLILR(D)	28.86	<0.1%	23739.3	4.93	0.000859746	0.00042096	0.000412289	0	0.000107254	4.63112e-05	0	0	0	0	0.000346401	0
P02768	Serum albumin	(K)EFNAETFTFHADICTLSEK(E)	28.5	<0.1%	71362.3	5.92	0	0.000410303	0.000223647	6.60201e-05	0.000486086	2.10833e-05	0	0	0	0	0	0.000305455
P02787	Serotransferrin	(K)EDPQTFYYAVAVVK(K)	22.67	<0.1%	79344.7	6.86	0	0	4.70631e-05	0	0.000138151	5.12967e-05	0	0	0	0	0.00180129	0.000187574
P02787	Serotransferrin	(K)SVIPSDGPSVACVK(K)	23.94	<0.1%	79344.7	6.86	1.38068e-05	4.44406e-06	3.13106e-05	9.52421e-05	0.000166883	2.46873e-05	0	0	0	0.000203493	0.000548468	0.000216646
P02787	Serotransferrin	(R)FDEFFSEGCAPGSK(K)	27	<0.1%	79344.7	6.86	0	6.56485e-07	7.81792e-07	2.83562e-05	0.000151336	9.4905e-05	0	0	0	4.45774e-05	0.00185325	0.000244921
P02790	Hemopexin	(R)GECQAEGVLFFQGDR(E)	27.12	<0.1%	52417.1	6.55	0	1.65187e-05	0	0	9.52493e-05	2.72101e-05	0	0	0	0	0.000192445	3.51651e-05
P04196	Histidine-rich glycoprotein	(K)DSPVLIDFFEDTER(Y)	23.2	<0.1%	60547.1	7.11	0	4.11369e-05	3.38388e-05	0	1.37757e-05	0	0	0	0	0	5.42695e-05	0
P05155	Plasma protease C1 inhibitor	(K)FQPTLLTLPR(I)	17.49	<0.1%	55381.4	6.09	0	2.52576e-05	5.65924e-05	0	1.30279e-05	1.24338e-05	0	0	0	0	0.000172046	7.04896e-05
P05155	Plasma protease C1 inhibitor	(K)TNLESILSYPK(D)	19.23	<0.1%	55381.4	6.09	0	1.44938e-05	7.00113e-05	0	0	1.74193e-05	0	0	0	0	9.58376e-05	5.73474e-05
P05155	Plasma protease C1 inhibitor	(K)VTTSQDMLSIMEK(L)	22.43	<0.1%	55381.4	6.09	0	0	2.76156e-05	0	3.1881e-05	2.41467e-05	0	0	0	0	0.000136059	4.06211e-05
P35908	Keratin, type II cytoskeletal 2 epidermal	(R)FLEQQNQVLQTK(W)	20.91	<0.1%	65717	8.32	3.41357e-05	0	0	4.95692e-05	0	0	0	0	0	0.00016172	8.60229e-06	0
P00738	Haptoglobin	(K)SPVGVQPILNEHTFCAGMSK(Y)	26.07	<0.1%	45889.1	6.13	0	0	0	0	0	9.00997e-06	0	0	0	0	0.000450321	0.00038152
P00738	Haptoglobin	(R)VGYVSGWGR(N)	23.04	<0.1%	45889.1	6.13	0	0	0	0	0	1.21334e-05	0	0	0	0	3.09836e-05	0.000103544
P00739	Haptoglobin-related protein	(R)ILGGHLDAK(G)	18.03	<0.1%	39542.3	6.64	0	0	0	0	0	2.4447e-06	0	0	0	0	0.00013933	0.000280365
P01009	Alpha-1-antitrypsin	(R)SASLHLPK(L)	18.04	<0.1%	46906.8	5.37	0	0	0	0	0	1.42357e-05	0	0	0	0	6.92802e-05	5.09755e-05
P01011	Alpha-1-antichymotrypsin	(K)ITLLSALVETR(T)	24	<0.1%	47821.2	5.33	0	0	0	0	3.68009e-05	1.82001e-05	0	0	0	0	0.000186287	5.69492e-05
P01011	Alpha-1-antichymotrypsin	(R)EIGELYLPK(F)	16.79	<0.1%	47821.2	5.33	0	0	0	0	1.87743e-05	2.08431e-05	0	0	0	0	0.000121625	9.7172e-05
P01011	Alpha-1-antichymotrypsin	(R)LYGSEAFATDFQDSAAAK(K)	24.34	<0.1%	47821.2	5.33	0	0	0	0	3.01098e-05	2.3486e-05	0	0	0	0	7.25518e-05	0
P01019	Angiotensinogen	(K)VLSALQAVQGLLVAQGR(A)	18.03	<0.1%	53438.5	5.87	0	0	0	0	1.08041e-05	8.10897e-06	0	0	0	0	4.8881e-05	0
P01019	Angiotensinogen	(R)SLDFTELDVAAEK(I)	20.43	<0.1%	53438.5	5.87	0	0	0	0	4.99862e-05	1.63381e-05	0	0	0	0	6.92802e-05	0
P01023	Alpha-2-macroglobulin	(K)AIGYLNTGYQR(Q)	23.22	<0.1%	164714	6.03	0	0	0	4.96233e-05	0	1.57374e-05	0	0	0	0.000134866	9.62225e-05	0.000144165
P01023	Alpha-2-macroglobulin	(K)ALLAYAFALAGNQDK(R)	21.55	<0.1%	164714	6.03	0	0	0	0	5.86452e-05	1.00311e-05	0	0	0	0	0.000394512	0
P01023	Alpha-2-macroglobulin	(K)ATVLNYLPK(C)	17.96	<0.1%	164714	6.03	0	0	0	0	0.000257803	6.36704e-05	0	0	0	0.000121738	0.000467641	0.000164476
P01023	Alpha-2-macroglobulin	(K)DMYSFLEDMGLK(A)	21.1	<0.1%	164714	6.03	0	0	0	0	2.77482e-05	0	0	0	0	0	6.139e-05	0
P01023	Alpha-2-macroglobulin	(K)DTVIKPLLVEPEGLEK(E)	24.09	<0.1%	164714	6.03	0	0	0	5.8444e-05	0.000156059	2.34259e-05	0	0	0	0.000229153	0.00103343	0.000193946
P01023	Alpha-2-macroglobulin	(K)GHFSISIPVK(S)	14.41	0.003	164714	6.03	0	0	0	0	8.61967e-05	1.51968e-05	0	0	0	0	0.000169352	0.000135404
P01023	Alpha-2-macroglobulin	(K)MVSGFIPLKPTVK(M)	22.77	<0.1%	164714	6.03	0	0	0	5.41148e-05	0	4.55904e-05	0	0	0	0.000156946	0.00038489	0.00016129
P01023	Alpha-2-macroglobulin	(K)NEDSLVFVQTDK(S)	19.97	<0.1%	164714	6.03	0	0	0	4.97315e-05	7.39953e-05	9.97103e-06	0	0	0	0.000126512	0.000219387	0.000191556
P01023	Alpha-2-macroglobulin	(K)QFSFPLSSEPFQGSYK(V)	20.71	<0.1%	164714	6.03	0	0	0	0	6.15972e-05	0	0	0	0	0	0.000209765	0
P01023	Alpha-2-macroglobulin	(K)SSSNEEVMFLTVQVK(G)	20.64	<0.1%	164714	6.03	0	0	0	0	0.000105679	0	0	0	0	0	0.000158575	0
P01023	Alpha-2-macroglobulin	(K)VDLSFSPSQSLPASHAHLR(V)	23.46	<0.1%	164714	6.03	0	0	0	0	0	2.55883e-05	0	0	0	0	5.90806e-05	6.84983e-05
P01023	Alpha-2-macroglobulin	(K)YNILPEKEEFPFALGVQTLPQTCDEPK(A)	16.68	<0.1%	164714	6.03	0	0	0	0	1.74558e-06	0	0	0	0	0	0.000162616	0
P01023	Alpha-2-macroglobulin	(R)IAQWQSFQLEGGLK(Q)	24.15	<0.1%	164714	6.03	0	0	0	0	0.000184595	2.22246e-05	0	0	0	0	0.000348325	0
P01023	Alpha-2-macroglobulin	(R)LLIYAVLPTGDVIGDSAK(Y)	20.79	<0.1%	164714	6.03	0	0	0	0	6.55331e-05	8.70963e-06	0	0	0	0	0.000139138	0
P01023	Alpha-2-macroglobulin	(R)LLLQQVSLPELPGEYSMK(V)	18	<0.1%	164714	6.03	0	0	0	0	6.92722e-05	6.84757e-06	0	0	0	0	0.000294441	0
P01023	Alpha-2-macroglobulin	(R)SASNMAIVDVK(M)	20.87	<0.1%	164714	6.03	0	0	0	4.35083e-05	0	0	0	0	0	9.78674e-05	4.13757e-05	4.34088e-05
P01023	Alpha-2-macroglobulin	(R)TEHPFTVEEFVLPK(F)	20.57	<0.1%	164714	6.03	0	0	0	0	0.000177904	0	0	0	0	0.000238104	0.00105267	8.48264e-05
P01023	Alpha-2-macroglobulin	(R)TEVSSNHVLIYLDK(V)	23.95	<0.1%	164714	6.03	0	0	0	0	5.07734e-05	0	0	0	0	0	0.000433001	0.000104739
P01023	Alpha-2-macroglobulin	(R)VGFYESDVMGR(G)	25.39	<0.1%	164714	6.03	0	0	0	0	3.56201e-05	1.45961e-05	0	0	0	6.5046e-05	0.000373343	0.000194344
P01023	Alpha-2-macroglobulin	(R)VSVQLEASPAFLAVPVEK(E)	22.43	<0.1%	164714	6.03	0	0	0	0	0.000163341	7.38817e-06	0	0	0	0	0.000271347	2.43727e-05
P01023	Alpha-2-macroglobulin	(R)VTAAPQSVCALR(A)	23	<0.1%	164714	6.03	0	0	0	0	2.63707e-05	8.34924e-06	0	0	0	0.000177832	0.000153956	0.000132218
P01023	Alpha-2-macroglobulin	(R)VVSMDENFHPLNELIPLVYIQDPK(G)	19.94	<0.1%	164714	6.03	0	0	0	0	4.25079e-05	0	0	0	0	0	0.000140677	0.000150139
P01024	Complement C3	(K)AGDFLEANYMNLQR(S)	22.67	<0.1%	188685	6.02	0	0	0	0	0.000122998	3.0754e-05	0	0	0	0	0.000194369	3.859e-05
P01024	Complement C3	(K)DICEEQVNSLPGSITK(A)	25.67	<0.1%	188685	6.02	0	0	0	0	2.9913e-05	1.64582e-05	0	0	0	0.000131882	0.000248254	0.000191955
P01024	Complement C3	(K)IWDVVEK(A)	16.27	<0.1%	188685	6.02	0	0	0	6.71024e-05	0	9.55056e-06	0	0	0	0.000239298	0	9.15966e-05
P01024	Complement C3	(K)LMNIFLK(D)	16.82	0.004	188685	6.02	0	0	0	0	9.24941e-05	2.67296e-05	0	0	0	8.95129e-05	0.000105845	8.88089e-05
P01024	Complement C3	(K)LSINTHPSQKPLSITVR(T)	19.44	<0.1%	188685	6.02	0	0	0	0	0	2.54682e-05	0	0	0	0.0001838	0.000102958	0.000219434
P01024	Complement C3	(K)QKPDGVFQEDAPVIHQEMIGGLR(N)	21.25	<0.1%	188685	6.02	0	0	0	0	8.79678e-05	0	0	0	0	0	0	6.73036e-05
P01024	Complement C3	(K)TIYTPGSTVLYR(I)	21.11	<0.1%	188685	6.02	0	0	0	0	2.97162e-05	1.39955e-05	0	0	0	0.000112189	0.000313685	6.05334e-05
P01024	Complement C3	(K)VFLDCCNYITELR(R)	27.07	<0.1%	188685	6.02	0	0	0	0	0.000119455	2.55883e-05	0	0	0	0	0.000185325	0
P01024	Complement C3	(K)VLLDGVQNPR(A)	20.62	<0.1%	188685	6.02	0	0	0	4.11814e-05	0	0	0	0	0	0.000213041	6.60086e-05	7.16843e-05
P01024	Complement C3	(K)VYAYYNLEESCTR(F)	24.25	<0.1%	188685	6.02	0	0	0	0	0	9.00997e-06	0	0	0	0	0.000101034	7.32773e-05
P01024	Complement C3	(R)AYYENSPQQVFSTEFEVK(E)	21.11	<0.1%	188685	6.02	0	0	0	0	2.77482e-05	0	0	0	0	0	1.12388e-05	0
P01024	Complement C3	(R)EVVADSVWVDVK(D)	20.91	<0.1%	188685	6.02	0	0	0	0	4.46727e-05	2.57685e-05	0	0	0	0	0.000148952	0
P01024	Complement C3	(R)IPIEDGSGEVVLSR(K)	26.95	<0.1%	188685	6.02	0	0	0	5.41148e-05	0	2.38464e-05	0	0	0	0.000238104	0.000365645	0.000306251
P01024	Complement C3	(R)ISLPESLK(R)	16.32	<0.1%	188685	6.02	0	0	0	0	0	1.47163e-05	0	0	0	0.000168881	3.19459e-05	0.000111509
P01024	Complement C3	(R)LESEETMVLEAHDAQGDVPVTVTVHDFPGKK(L)	25.35	<0.1%	188685	6.02	0	0	0	0	6.43523e-05	0	0	0	0	0	0.000161269	0
P01024	Complement C3	(R)SGIPIVTSPYQIHFTK(T)	22.82	<0.1%	188685	6.02	0	0	0	0	5.9826e-05	0	0	0	0	0	0.000219387	0
P01024	Complement C3	(R)TVMVNIENPEGIPVK(Q)	23.85	<0.1%	188685	6.02	0	0	0	0	0.000236155	6.24691e-05	0	0	0	0.000118754	0.000440699	0.000164077
P01024	Complement C3	(R)YYTYLIMNK(G)	17.22	<0.1%	188685	6.02	0	0	0	0	6.14004e-06	1.06918e-06	0	0	0	0	0.00012278	0
P02774	Vitamin D-binding protein	(K)GQELCADYSENTFTEYK(K)	22.89	<0.1%	54560.2	5.4	0	0	0	0	0	7.6885e-06	0	0	0	0	4.69566e-05	0
P02774	Vitamin D-binding protein	(K)SLGECCDVEDSTTCFNAK(G)	21.26	<0.1%	54560.2	5.4	0	0	0	0	0	8.28917e-06	0	0	0	0	3.17534e-05	5.61527e-05
P02774	Vitamin D-binding protein	(K)VPTADLEDVLPLAEDITNILSK(C)	21.26	<0.1%	54560.2	5.4	0	0	0	0	3.66041e-05	0	0	0	0	0	0.000131247	0
P02787	Serotransferrin	(K)CSTSSLLEACTFR(R)	23.89	<0.1%	79344.7	6.86	0	0	0	0	4.23111e-05	1.63381e-05	0	0	0	0	0.000779402	0.000185583
P02787	Serotransferrin	(K)DGAGDVAFVK(H)	22.09	<0.1%	79344.7	6.86	0	0	0	0	0	1.25539e-05	0	0	0	8.83194e-05	7.21669e-05	0.000101155
P02787	Serotransferrin	(K)DLLFRDDTVCLAK(L)	19.2	<0.1%	79344.7	6.86	0	0	0	0	0.000133231	0	0	0	0	0	0.000600428	0
P02787	Serotransferrin	(K)DSGFQMNQLR(G)	23.55	<0.1%	79344.7	6.86	0	0	0	0	3.97528e-05	3.24959e-05	0	0	0	6.20623e-05	0.000141062	0.000101155
P02787	Serotransferrin	(K)EDLIWELLNQAQEHFGK(D)	26.22	<0.1%	79344.7	6.86	0	0	0	0	5.72676e-05	0	0	0	0	0	7.75553e-05	1.88769e-05
P02787	Serotransferrin	(K)EFQLFSSPHGK(D)	21.69	<0.1%	79344.7	6.86	0	0	0	0	0.000114142	2.78108e-05	0	0	0	0	0.000473415	0.000342093
P02787	Serotransferrin	(K)EGYYGYTGAFR(C)	20.74	<0.1%	79344.7	6.86	0	0	0	0	5.15606e-05	2.78708e-05	0	0	0	0	0.00024633	6.17281e-05
P02787	Serotransferrin	(K)HQTVPQNTGGK(N)	20.74	<0.1%	79344.7	6.86	0	0	0	0	5.7858e-05	0	0	0	0	0	0.000191483	0.000228593
P02787	Serotransferrin	(K)HSTIFENLANK(A)	21.17	<0.1%	79344.7	6.86	0	0	0	0	8.63935e-05	5.30987e-05	0	0	0	0	0.000244405	0.000708878
P02787	Serotransferrin	(K)IECVSAETTEDCIAK(I)	25.29	<0.1%	79344.7	6.86	0	0	0	5.68206e-05	5.92356e-05	2.70299e-05	0	0	0	0.000171865	0.000348325	0.000322978
P02787	Serotransferrin	(K)LCMGSGLNLCEPNNK(E)	22.92	<0.1%	79344.7	6.86	0	0	0	0	5.03798e-05	1.49565e-05	0	0	0	0	0.000748611	9.67738e-06
P02787	Serotransferrin	(K)MYLGYEYVTAIR(N)	22.15	<0.1%	79344.7	6.86	0	0	0	0	0.000247963	3.9764e-05	0	0	0	0	0.000529224	2.19035e-05
P02787	Serotransferrin	(K)NLNEKDYELLCLDGTR(K)	26.53	<0.1%	79344.7	6.86	0	0	0	0	7.83248e-05	0	0	0	0	0	0.00048881	9.43843e-05
P02787	Serotransferrin	(K)SCHTGLGR(S)	14.19	0.002	79344.7	6.86	0	0	0	0	6.57299e-05	1.68186e-05	0	0	0	0	0.000152224	0.000228992
P02787	Serotransferrin	(K)YLGEEYVK(A)	18.81	<0.1%	79344.7	6.86	0	0	0	0	4.30983e-05	3.77818e-05	0	0	0	0.000130092	5.61939e-05	9.51808e-05
P02787	Serotransferrin	(R)AIAANEADAVTLDAGLVYDAYLAPNNLKPVVAEFYGSK(E)	25.51	<0.1%	79344.7	6.86	0	0	0	0	1.82824e-06	0	0	0	0	0	0.000184362	0
P02787	Serotransferrin	(R)APNHAVVTR(K)	20.39	<0.1%	79344.7	6.86	0	0	0	0	0.000115716	1.06318e-05	0	0	0	0	0.000371419	0.000356829
P02787	Serotransferrin	(R)DQYELLCLDNTR(K)	25.13	<0.1%	79344.7	6.86	0	0	0	0	0.000125162	3.67006e-05	0	0	0	0	0.000290592	5.61527e-05
P02787	Serotransferrin	(R)EGTCPEAPTDECKPVK(W)	23.34	<0.1%	79344.7	6.86	0	0	0	0	2.91258e-05	2.58286e-05	0	0	0	0	8.19816e-05	0.000605334
P02787	Serotransferrin	(R)SAGWNIPIGLLYCDLPEPR(K)	24.76	<0.1%	79344.7	6.86	0	0	0	0	1.38741e-05	0	0	0	0	0	0.000124319	0
P02787	Serotransferrin	(R)SMGGKEDLIWELLNQAQEHFGK(D)	25.92	<0.1%	79344.7	6.86	0	0	0	0	6.41555e-05	0	0	0	0	0	0.000706273	9.35878e-05
P02787	Serotransferrin	(R)TAGWNIPMGLLYNK(I)	21.09	<0.1%	79344.7	6.86	0	0	0	0	0.000108238	3.27362e-05	0	0	0	0	0.000192445	0
P02787	Serotransferrin	(R)WCAVSEHEATK(C)	21.07	<0.1%	79344.7	6.86	0	0	0	0	0	2.10833e-05	0	0	0	0	0.000211689	0.00050179
P02790	Hemopexin	(K)GGYTLVSGYPK(R)	16.04	0.006	52417.1	6.55	0	0	0	0	0	1.56773e-05	0	0	0	0	3.44477e-05	4.6993e-05
P02790	Hemopexin	(K)SGAQATWTELPWPHEK(V)	21.81	<0.1%	52417.1	6.55	0	0	0	0	7.65537e-05	0	0	0	0	0	0.000381041	0
P02790	Hemopexin	(R)DYFMPCPGR(G)	15.32	0.008	52417.1	6.55	0	0	0	0	8.73774e-07	1.24938e-06	0	0	0	0	2.90592e-06	0
P04114	Apolipoprotein B-100	(K)AVSMPSFSILGSDVR(V)	24.72	<0.1%	516964	6.59	0	0	0	0	2.38123e-05	1.00912e-05	0	0	0	0	7.6978e-05	2.01114e-05
P04217	Alpha-1B-glycoprotein	(R)ATWSGAVLAGR(D)	21.61	<0.1%	54823	5.56	0	0	0	0	0	4.54102e-06	0	0	0	0	2.44405e-05	0
P05155	Plasma protease C1 inhibitor	(R)LEDMEQALSPSVFK(A)	19.12	<0.1%	55381.4	6.09	0	0	0	0	1.53304e-05	1.92813e-05	0	0	0	0	0.000106422	0
P19823	Inter-alpha-trypsin inhibitor heavy chain H2	(K)VVNNSPQPQNVVFDVQIPK(G)	26.07	<0.1%	106918	6.4	0	0	0	0	3.12906e-05	0	0	0	0	0	0.000134519	0
P19827	Inter-alpha-trypsin inhibitor heavy chain H1	(R)GMADQDGLKPTIDKPSEDSPPLEMLGPR(R)	19.67	<0.1%	101844	6.31	0	0	0	0	0	2.12035e-06	0	0	0	0	8.00571e-05	0
P68871	Hemoglobin subunit beta	(K)VNVDEVGGEALGR(L)	21.56	<0.1%	16112.2	6.75	0	0	0	0	0	2.5348e-05	0	0	0	0	1.59344e-05	0.000210672
P68871	Hemoglobin subunit beta	(K)VVAGVANALAHK(Y)	23.36	<0.1%	16112.2	6.75	0	0	0	0	0	1.1773e-05	0	0	0	0	6.63935e-05	0.000273993
P68871	Hemoglobin subunit beta	(R)FFESFGDLSTPDAVMGNPK(V)	20.6	<0.1%	16112.2	6.75	0	0	0	0	2.87322e-05	9.00997e-06	0	0	0	0	8.54456e-05	0
P68871	Hemoglobin subunit beta	(R)LLGNVLVCVLAHHFGK(E)	26.21	<0.1%	16112.2	6.75	0	0	0	0	0	1.71189e-05	0	0	0	0	9.44905e-05	0
P69905	Hemoglobin subunit alpha	(K)VADALTNAVAHVDDMPNALSALSDLHAHK(L)	22.91	<0.1%	15314.3	8.9	0	0	0	0	0	1.39354e-05	0	0	0	0	4.15681e-05	0.000270807
Q96GZ6	Solute carrier family 41 member 3	(K)GmAIFTPVICGVGGNLVAIQTSRISTYLHmWSAPGVLPLQmKK(F)	14.29	0.009	55393.3	8.6	0	0	0	0	7.45857e-06	0	0	0	0	0	0	5.37632e-05
P00738	Haptoglobin	(K)AVGDKLPECEADDGCPKPPEIAHGYVEHSVR(Y)	22.33	<0.1%	45889.1	6.13	0.000103762	6.06396e-05	7.46787e-05	0	0	0	0	0	0	0	8.62154e-05	0.000154918
P00738	Haptoglobin	(R)TEGDGVYTLNNEK(Q)	21.04	<0.1%	45889.1	6.13	0.00020456	1.53464e-05	0.000178723	0	0	0	0	0	0	0	9.66074e-05	5.73474e-05
P01008	Antithrombin-III	(R)VAEGTQVLELPFKGDDITMVLILPKPEK(S)	18.65	<0.1%	53057.9	6.32	0	1.37478e-05	6.88444e-05	0	0	0	0	0	0	0	3.59872e-05	0
P01009	Alpha-1-antitrypsin	(K)AVLTIDEK(G)	17.83	<0.1%	46906.8	5.37	0.000124091	0	4.70631e-05	0	0	0	0	0	0	7.51908e-05	0	0
P01009	Alpha-1-antitrypsin	(K)ITPNLAEFAFSLYR(Q)	26.7	<0.1%	46906.8	5.37	0	5.25401e-05	4.55073e-05	0	0	0	0	0	0	0	3.71419e-05	0
P01009	Alpha-1-antitrypsin	(K)LYHSEAFTVNFGDTEEAKK(Q)	18.56	<0.1%	46906.8	5.37	0	5.6057e-05	0.000161609	0	0	0	0	0	0	0	4.40699e-05	0
P01009	Alpha-1-antitrypsin	(R)TLNQPDSQLQLTTGNGLFLSEGLK(L)	27.02	<0.1%	46906.8	5.37	0	2.87745e-05	0	0	0	0	0	0	0	0	7.1782e-05	0
P01024	Complement C3	(R)LESEETMVLEAHDAQGDVPVTVTVHDFPGK(K)	14.2	0.004	188685	6.02	0	2.01421e-06	6.10654e-06	0	0	0	0	0	0	0	8.0442e-05	0
P02647	Apolipoprotein A-I	(K)KWQEEMELYR(Q)	19.6	<0.1%	30777.3	5.56	0.000125362	9.39967e-05	7.68179e-05	0	0	0	0	0	0	0	5.19601e-05	0
P02647	Apolipoprotein A-I	(K)LREQLGPVTQEFWDNLEK(E)	23.45	<0.1%	30777.3	5.56	0.000927509	0.00039112	2.10034e-05	0	0	0	0	0	0	0	8.60229e-05	0.000133014
P02647	Apolipoprotein A-I	(K)VSFLSALEEYTKK(L)	19.54	<0.1%	30777.3	5.56	8.17394e-05	6.68208e-05	0	0	0	0	0	0	0	0	0.000105845	0
P02652	Apolipoprotein A-II	(K)AGTELVNFLSYFVELGTQPATQ(-)	19.72	<0.1%	11288.9	6.27	0	0.000153464	4.0062e-05	0	0	0	0	0	0	0	2.44405e-05	0
P02750	Leucine-rich alpha-2-glycoprotein	(K)DLLLPQPDLR(Y)	19.98	<0.1%	38405.4	6.46	0	8.51512e-05	8.4208e-05	0	0	0	0	0	0	0	3.23308e-05	0
P02763	Alpha-1-acid glycoprotein 1	(K)TYMLAFDVNDEK(N)	21.03	<0.1%	23739.3	4.93	0.000152044	3.17585e-05	0.000748732	0	0	0	0	0	0	0	5.42695e-05	0
P02765	Alpha-2-HS-glycoprotein	(K)VWPQQPSGELFEIEIDTLETTCHVLDPTPVAR(C)	20.74	<0.1%	40122.7	5.43	0	0.000117229	0.000289769	0	0	0	0	0	0	0	2.15538e-05	0
P02765	Alpha-2-HS-glycoprotein	(R)HTFMGVVSLGSPSGEVSHPR(K)	22.67	<0.1%	40122.7	5.43	0.000124938	0.000143872	0.000156164	0	0	0	0	0	0	0	5.48468e-05	0
P02765	Alpha-2-HS-glycoprotein	(R)QPNCDDPETEEAALVAIDYINQNLPWGYK(H)	14.66	0.003	40122.7	5.43	0	2.33393e-05	0.000134188	0	0	0	0	0	0	0	3.90663e-05	0
P02766	Transthyretin	(K)AADDTWEPFASGK(T)	21.58	<0.1%	16000.8	5.52	7.75042e-05	7.92897e-05	0.000115713	0	0	0	0	0	0	0	0.000124127	6.65071e-05
P02766	Transthyretin	(K)TSESGELHGLTTEEEFVEGIYK(V)	18.1	<0.1%	16000.8	5.52	0	0.000223802	0	0	0	0	0	0	0	0	0	3.1103e-05
P02787	Serotransferrin	(K)DYELLCLDGTR(K)	23.9	<0.1%	79344.7	6.86	0	0	2.74211e-05	0	0	0	0	0	0	0	0.000109694	9.95615e-05
P04196	Histidine-rich glycoprotein	(R)ADLFYDVEALDLESPK(N)	25.32	<0.1%	60547.1	7.11	0	3.74068e-05	2.74211e-05	0	0	0	0	0	0	0	4.86886e-05	0
P04196	Histidine-rich glycoprotein	(R)DGYLFQLLR(I)	19.5	<0.1%	60547.1	7.11	0	4.30552e-05	0	0	0	0	0	0	0	0	3.92588e-05	0
P04264	Keratin, type II cytoskeletal 1	(R)TNAENEFVTIK(K)	17.98	<0.1%	66208.7	8.32	3.57874e-05	0	0	0	0	0	0	0	0	7.57876e-05	0	0
P05155	Plasma protease C1 inhibitor	(K)GVTSVSQIFHSPDLAIR(D)	22.84	<0.1%	55381.4	6.09	0	0	8.0124e-05	0	0	0	0	0	0	0	9.17963e-05	4.42053e-05
P19652	Alpha-1-acid glycoprotein 2	(K)EQLGEFYEALDCLCIPR(S)	25.25	<0.1%	23887.5	5.04	0.000239712	0.000156661	0.000532863	0	0	0	0	0	0	0	2.65574e-05	0
P19652	Alpha-1-acid glycoprotein 2	(R)EHVAHLLFLR(D)	18.81	<0.1%	23887.5	5.04	0	0.000125755	0	0	0	0	0	0	0	0	5.25375e-05	0
P25311	Zinc-alpha-2-glycoprotein	(K)AYLEEECPATLR(K)	23.97	<0.1%	34486.3	5.71	9.23274e-05	2.22736e-05	7.75958e-05	0	0	0	0	0	0	0	1.32595e-06	0
P25311	Zinc-alpha-2-glycoprotein	(K)EIPAWVPFDPAAQITK(Q)	20.71	<0.1%	34486.3	5.71	1.63902e-05	0.00010476	0.000114546	0	0	0	0	0	0	0	3.04063e-05	0
P25311	Zinc-alpha-2-glycoprotein	(K)HVEDVPAFQALGSLNDLQFFR(Y)	22.84	<0.1%	34486.3	5.71	0	0	4.18123e-05	0	0	0	0	0	0	0	1.24319e-05	0
P41240	Tyrosine-protein kinase CSK	(R)EGIIPANYVQK(R)	14.46	0.004	51274	6.63	0	0.000201421	0	0	0	0	0	0	0	0	1.68582e-05	0
A2RTX5	Probable threonine--tRNA ligase 2, cytoplasmic	(K)VNGELWDLDRPLEGDSSLELLTFDNEEAQAVYWHSSAHILGEAmELYYGGHLCYGPPIENGFYYDmFIEDR(A)	12.91	0.008	93670.8	5.74	0	0	0	0	0	0	0	0	0	0	1.38753e-05	0
A6NI28	Rho GTPase-activating protein 42	(R)KPRGRYTPCLAEPDSDSYSSSPDSTPmGSIESLSSHSSEQNSTTK(S)	13	0.008	99309	8.51	0	0	0	0	0	0	0	0	0	0	7.48611e-06	0
A6NIY4	Putative speedy protein E5	(R)IHFFLALYLANDmEEDDEDSKQNIFHFLYGK(N)	18	<0.1%	40767.2	9.82	0	0	0	0	0	0	0	0	0	0	0	1.39784e-05
A6PVS8	Leucine-rich repeat and IQ domain-containing protein 3	(K)WIYITKGYEDK(L)	14.7	0.002	74301.3	9.89	0	0	0	0	0	0	0	0	0	0	2.25161e-05	0
O15230	Laminin subunit alpha-5	(K)LSILENR(G)	12.57	0.005	412282	6.68	0	0	0	0	0	0	0	0	0	0	1.20086e-05	0
O43300	Leucine-rich repeat transmembrane neuronal protein 2	(K)WPLGAPMLAAIYAMSmVLKMLPALGMACPPKCR(C)	14.46	0.002	59988	8.97	0	0	0	0	0	0	0	0	0	0	1.00841e-05	0
O43306	Adenylate cyclase type 6	(K)TIGSTYMAASGLNASTYDQVGRSHITALADYAmRLmEQmK(H)	12.61	0.009	132382	9.2	0	0	0	0	0	0	0	0	0	0	1.82053e-05	0
P00450	Ceruloplasmin	(K)ERGPEEEHLGILGPVIWAEVGDTIR(V)	13.48	0.003	123059	5.44	0	0	0	0	0	0	0	0	0	0	2.79045e-06	0
P00450	Ceruloplasmin	(R)DTANLFPQTSLTLHMWPDTEGTFNVECLTTDHYTGGMK(Q)	13.85	0.002	123059	5.44	0	0	0	0	0	0	0	0	0	0	2.48254e-05	0
P00450	Ceruloplasmin	(R)GPEEEHLGILGPVIWAEVGDTIR(V)	18.73	<0.1%	123059	5.44	0	0	0	0	0	0	0	0	0	0	2.6365e-05	0
P00450	Ceruloplasmin	(R)SGAGTEDSACIPWAYYSTVDQVK(D)	20.42	<0.1%	123059	5.44	0	0	0	0	0	0	0	0	0	0	3.46401e-05	0
P00505	Aspartate aminotransferase, mitochondrial	(K)KMNLGVGAYRDDNGKPYVLPSVR(K)	12.45	0.005	47916.2	9.44	0	0	0	0	0	0	0	0	0	0	4.84961e-05	0
P00738	Haptoglobin	(K)VVLHPNYSQVDIGLIK(L)	19.08	<0.1%	45889.1	6.13	0	0	0	0	0	0	0	0	0	0	0.000133172	0
P00738	Haptoglobin	(R)HYEGSTVPEKK(T)	17.78	<0.1%	45889.1	6.13	0	0	0	0	0	0	0	0	0	0	5.92731e-05	6.84983e-05
P00738	Haptoglobin	(R)VMPICLPSKDYAEVGR(V)	16.32	<0.1%	45889.1	6.13	0	0	0	0	0	0	0	0	0	0	0	0.000124651
P00747	Plasminogen	(K)VILGAHQEVNLEPHVQEIEVSR(L)	15.7	<0.1%	93306	7.14	0	0	0	0	0	0	0	0	0	0	5.60015e-05	0
P00747	Plasminogen	(R)KLYDYCDVPQCAAPSFDCGKPQVEPK(K)	18.73	<0.1%	93306	7.14	0	0	0	0	0	0	0	0	0	0	1.10271e-05	0
P00747	Plasminogen	(R)NPDGDVGGPWCYTTNPR(K)	22.64	<0.1%	93306	7.14	0	0	0	0	0	0	0	0	0	0	4.86886e-05	0
P00751	Complement factor B	(K)CLVNLIEK(V)	15.4	<0.1%	86900.6	6.68	0	0	0	0	0	0	0	0	0	0	4.31077e-05	6.13299e-05
P00751	Complement factor B	(K)EELLPAQDIK(A)	16.2	<0.1%	86900.6	6.68	0	0	0	0	0	0	0	0	0	0	2.44405e-06	5.21702e-05
P00751	Complement factor B	(K)EKLQDEDLGFL(-)	12.58	0.005	86900.6	6.68	0	0	0	0	0	0	0	0	0	0	5.08055e-05	0
P00751	Complement factor B	(R)FLCTGGVSPYADPNTCR(G)	19.07	<0.1%	86900.6	6.68	0	0	0	0	0	0	0	0	0	0	2.42481e-05	5.93387e-05
P00751	Complement factor B	(R)YGLVTYATYPK(I)	15.67	<0.1%	86900.6	6.68	0	0	0	0	0	0	0	0	0	0	5.13828e-05	0
P01008	Antithrombin-III	(K)TSDQIHFFFAK(L)	19.2	<0.1%	53057.9	6.32	0	0	0	0	0	0	0	0	0	0	0.000179551	0
P01008	Antithrombin-III	(R)DDLYVSDAFHK(A)	16.25	0.006	53057.9	6.32	0	0	0	0	0	0	0	0	0	0	7.65931e-06	3.46076e-06
P01008	Antithrombin-III	(R)FATTFYQHLADSK(N)	26.22	<0.1%	53057.9	6.32	0	0	0	0	0	0	0	0	0	0	0.000100649	0
P01009	Alpha-1-antitrypsin	(K)FLEDVKK(L)	17.11	0.004	46906.8	5.37	0	0	0	0	0	0	0	0	0	0	0.000103535	0.000249302
P01009	Alpha-1-antitrypsin	(K)FLENEDRR(S)	13.26	0.003	46906.8	5.37	0	0	0	0	0	0	0	0	0	0	0.000153571	0
P01009	Alpha-1-antitrypsin	(K)FNKPFVFLMIEQNTK(S)	17.42	<0.1%	46906.8	5.37	0	0	0	0	0	0	0	0	0	0	3.56023e-05	0
P01009	Alpha-1-antitrypsin	(K)TDTSHHDQDHPTFNK(I)	17.95	<0.1%	46906.8	5.37	0	0	0	0	0	0	0	0	0	0	3.40628e-05	0.000119872
P01009	Alpha-1-antitrypsin	(R)LGMFNIQHCK(K)	20.55	<0.1%	46906.8	5.37	0	0	0	0	0	0	0	0	0	0	0.000163771	4.46036e-05
P01011	Alpha-1-antichymotrypsin	(K)EQLSLLDR(F)	14.4	0.002	47821.2	5.33	0	0	0	0	0	0	0	0	0	0	9.62225e-06	5.89404e-05
P01011	Alpha-1-antichymotrypsin	(K)MEEVEAMLLPETLK(R)	19.63	<0.1%	47821.2	5.33	0	0	0	0	0	0	0	0	0	0	6.3122e-05	0
P01011	Alpha-1-antichymotrypsin	(K)WEMPFDPQDTHQSR(F)	18.59	<0.1%	47821.2	5.33	0	0	0	0	0	0	0	0	0	0	3.17534e-05	0
P01011	Alpha-1-antichymotrypsin	(R)NLAVSQVVHK(A)	16.25	<0.1%	47821.2	5.33	0	0	0	0	0	0	0	0	0	0	2.34783e-05	0
P01019	Angiotensinogen	(K)ALQDQLVLVAAK(L)	19.66	<0.1%	53438.5	5.87	0	0	0	0	0	0	0	0	0	0	1.46066e-05	0
P01019	Angiotensinogen	(K)DPTFIPAPIQAK(T)	14.88	<0.1%	53438.5	5.87	0	0	0	0	0	0	0	0	0	0	4.75339e-05	0
P01019	Angiotensinogen	(R)FMQAVTGWK(T)	18.53	<0.1%	53438.5	5.87	0	0	0	0	0	0	0	0	0	0	6.42766e-06	0
P01023	Alpha-2-macroglobulin	(K)AAQVTIQSSGTFSSK(F)	20.33	<0.1%	164714	6.03	0	0	0	0	0	0	0	0	0	0	1.6762e-05	0
P01023	Alpha-2-macroglobulin	(K)ALLAYAFALAGNQDKR(K)	24.95	<0.1%	164714	6.03	0	0	0	0	0	0	0	0	0	0	9.0834e-05	0
P01023	Alpha-2-macroglobulin	(K)APVGHFYEPQAPSAEVEMTSYVLLAYLTAQPAPTSEDLTSATNIVK(W)	18.67	<0.1%	164714	6.03	0	0	0	0	0	0	0	0	0	0	5.13828e-05	0
P01023	Alpha-2-macroglobulin	(K)EEFPFALGVQTLPQTCDEPK(A)	19.77	<0.1%	164714	6.03	0	0	0	0	0	0	0	0	0	0	2.65574e-05	0
P01023	Alpha-2-macroglobulin	(K)FEVQVTVPK(I)	16.55	<0.1%	164714	6.03	0	0	0	0	0	0	0	0	0	0	9.46829e-05	0.000125448
P01023	Alpha-2-macroglobulin	(K)HYDGSYSTFGER(Y)	16.45	<0.1%	164714	6.03	0	0	0	0	0	0	0	0	0	0	6.06202e-05	3.03862e-05
P01023	Alpha-2-macroglobulin	(K)LHTEAQIQEEGTVVELTGR(Q)	28.25	<0.1%	164714	6.03	0	0	0	0	0	0	0	0	0	0	0.000183593	0
P01023	Alpha-2-macroglobulin	(K)LPPNVVEESAR(A)	21.52	<0.1%	164714	6.03	0	0	0	0	0	0	0	0	0	0.000228556	0.000304063	0.000142174
P01023	Alpha-2-macroglobulin	(K)MCPQLQQYEMHGPEGLR(V)	24.43	<0.1%	164714	6.03	0	0	0	0	0	0	0	0	0	0	0.00013144	0
P01023	Alpha-2-macroglobulin	(K)QQNAQGGFSSTQDTVVALHALSK(Y)	18.01	<0.1%	164714	6.03	0	0	0	0	0	0	0	0	0	0	6.46615e-05	8.68177e-05
P01023	Alpha-2-macroglobulin	(K)SIYKPGQTVK(F)	18.86	<0.1%	164714	6.03	0	0	0	0	0	0	0	0	0	0	0.000252103	0.000107526
P01023	Alpha-2-macroglobulin	(K)VDSHFR(Q)	15.43	<0.1%	164714	6.03	0	0	0	0	0	0	0	0	0	0	4.83037e-05	0
P01023	Alpha-2-macroglobulin	(K)VTGEGCVYLQTSLK(Y)	26.5	<0.1%	164714	6.03	0	0	0	0	0	0	0	0	0	0	0.000143179	0
P01023	Alpha-2-macroglobulin	(K)VYDYYETDEFAIAEYNAPCSK(D)	23.19	<0.1%	164714	6.03	0	0	0	0	0	0	0	0	0	0	6.50464e-06	0
P01023	Alpha-2-macroglobulin	(R)AVDQSVLLMKPDAELSASSVYNLLPEK(D)	24.99	<0.1%	164714	6.03	0	0	0	0	0	0	0	0	0	0	0.000259801	0
P01023	Alpha-2-macroglobulin	(R)DLKPAIVK(V)	15.39	<0.1%	164714	6.03	0	0	0	0	0	0	0	0	0	0	0.00015742	0.000170848
P01023	Alpha-2-macroglobulin	(R)LVHVEEPHTETVR(K)	13.12	0.008	164714	6.03	0	0	0	0	0	0	0	0	0	0	0.000313685	0
P01023	Alpha-2-macroglobulin	(R)NALFCLESAWK(T)	23.92	<0.1%	164714	6.03	0	0	0	0	0	0	0	0	0	0	6.44691e-05	0
P01023	Alpha-2-macroglobulin	(R)NQGNTWLTAFVLK(T)	20.51	<0.1%	164714	6.03	0	0	0	0	0	0	0	0	0	0	0.000133749	0
P01023	Alpha-2-macroglobulin	(R)QGIPFFGQVR(L)	18.35	<0.1%	164714	6.03	0	0	0	0	0	0	0	0	0	0	0.000307912	0.000102349
P01023	Alpha-2-macroglobulin	(R)SPCYGYQWVSEEHEEAHHTAYLVFSPSK(S)	17.56	<0.1%	164714	6.03	0	0	0	0	0	0	0	0	0	0	0.000149722	0
P01023	Alpha-2-macroglobulin	(R)SSGSLLNNAIK(G)	20.93	<0.1%	164714	6.03	0	0	0	0	0	0	0	0	0	0.000157543	2.67499e-05	5.89404e-05
P01024	Complement C3	(K)AAVYHHFISDGVR(K)	18.3	<0.1%	188685	6.02	0	0	0	0	0	0	0	0	0	0	5.25375e-05	0
P01024	Complement C3	(K)DYAGVFSDAGLTFTSSSGQQTAQR(A)	18.49	<0.1%	188685	6.02	0	0	0	0	0	0	0	0	0	0	1.76472e-05	0
P01024	Complement C3	(K)EDIPPADLSDQVPDTESETR(I)	17.08	0.004	188685	6.02	0	0	0	0	0	0	0	0	0	0	2.23236e-05	2.25407e-05
P01024	Complement C3	(K)EYVLPSFEVIVEPTEK(F)	20.96	<0.1%	188685	6.02	0	0	0	0	0	0	0	0	0	0	0.00018417	0
P01024	Complement C3	(K)GQGTLSVVTMYHAK(A)	21.79	<0.1%	188685	6.02	0	0	0	0	0	0	0	0	0	5.44835e-05	0.000128938	8.64194e-05
P01024	Complement C3	(K)GVFVLNKK(N)	13.34	0.008	188685	6.02	0	0	0	0	0	0	0	0	0	0	2.09765e-05	0
P01024	Complement C3	(K)GYTQQLAFR(Q)	16.88	<0.1%	188685	6.02	0	0	0	0	0	0	0	0	0	4.97692e-05	0	4.50018e-05
P01024	Complement C3	(K)HLIVTPSGCGEQNMIGMTPTVIAVHYLDETEQWEK(F)	17.85	<0.1%	188685	6.02	0	0	0	0	0	0	0	0	0	0	4.27228e-05	0
P01024	Complement C3	(K)QDSLSSQNQLGVLPLSWDIPELVNMGQWK(I)	22.32	<0.1%	188685	6.02	0	0	0	0	0	0	0	0	0	0	2.82894e-05	0
P01024	Complement C3	(K)QELSEAEQATR(T)	22.08	<0.1%	188685	6.02	0	0	0	0	0	0	0	0	0	4.57113e-05	0	0
P01024	Complement C3	(K)RIPIEDGSGEVVLSR(K)	18.4	<0.1%	188685	6.02	0	0	0	0	0	0	0	0	0	5.96753e-05	0	0
P01024	Complement C3	(K)SGSDEVQVGQQR(T)	19.29	<0.1%	188685	6.02	0	0	0	0	0	0	0	0	0	7.93681e-05	1.01803e-05	7.68615e-05
P01024	Complement C3	(K)TGLQEVEVK(A)	18.9	<0.1%	188685	6.02	0	0	0	0	0	0	0	0	0	0.000123528	0	0
P01024	Complement C3	(K)VHQYFNVELIQPGAVK(V)	19.58	<0.1%	188685	6.02	0	0	0	0	0	0	0	0	0	0	0.000111426	0
P01024	Complement C3	(K)VQLSNDFDEYIMAIEQTIK(S)	26.66	<0.1%	188685	6.02	0	0	0	0	0	0	0	0	0	0	6.67784e-05	0
P01024	Complement C3	(K)VRVELLHNPAFCSLATTK(R)	14.02	0.002	188685	6.02	0	0	0	0	0	0	0	0	0	0	8.89096e-06	0
P01024	Complement C3	(K)VSHSEDDCLAFK(V)	15.52	<0.1%	188685	6.02	0	0	0	0	0	0	0	0	0	0	2.67499e-05	0
P01024	Complement C3	(R)APSTWLTAYVVK(V)	17.04	<0.1%	188685	6.02	0	0	0	0	0	0	0	0	0	0	7.89024e-05	0
P01024	Complement C3	(R)ASHLGLAR(S)	12.8	0.004	188685	6.02	0	0	0	0	0	0	0	0	0	0	5.29224e-05	0
P01024	Complement C3	(R)EGVQKEDIPPADLSDQVPDTESETR(I)	15.82	<0.1%	188685	6.02	0	0	0	0	0	0	0	0	0	9.24967e-05	0	0
P01024	Complement C3	(R)EPGQDLVVLPLSITTDFIPSFR(L)	15.64	<0.1%	188685	6.02	0	0	0	0	0	0	0	0	0	0	3.09836e-05	0
P01024	Complement C3	(R)FISLGEACK(K)	17.69	<0.1%	188685	6.02	0	0	0	0	0	0	0	0	0	0.00014143	3.42552e-05	9.08001e-05
P01024	Complement C3	(R)IHWESASLLR(S)	15.83	<0.1%	188685	6.02	0	0	0	0	0	0	0	0	0	0	6.08126e-05	0.000120669
P01024	Complement C3	(R)ISLPESLKR(I)	14.41	0.004	188685	6.02	0	0	0	0	0	0	0	0	0	0	2.79045e-05	0
P01024	Complement C3	(R)NTLIIYLDK(V)	15.63	<0.1%	188685	6.02	0	0	0	0	0	0	0	0	0	0	8.2174e-05	0
P01024	Complement C3	(R)QGALELIK(K)	13.73	0.007	188685	6.02	0	0	0	0	0	0	0	0	0	0	0	4.77895e-05
P01024	Complement C3	(R)QPSSAFAAFVK(R)	19.5	<0.1%	188685	6.02	0	0	0	0	0	0	0	0	0	9.07064e-05	8.15967e-05	4.97808e-05
P01024	Complement C3	(R)SYTVAIAGYALAQMGR(L)	19.84	<0.1%	188685	6.02	0	0	0	0	0	0	0	0	0	0	2.44405e-06	0
P01024	Complement C3	(R)TFISPIK(C)	15.33	<0.1%	188685	6.02	0	0	0	0	0	0	0	0	0	0.000124721	0	0
P01024	Complement C3	(R)VELLHNPAFCSLATTK(R)	23	<0.1%	188685	6.02	0	0	0	0	0	0	0	0	0	0	0.000123935	0
P01042	Kininogen-1	(K)FSVATQTCQITPAEGPVVTAQYDCLGCVHPISTQSPDLEPILR(H)	18.18	<0.1%	73040.1	6.34	0	0	0	0	0	0	0	0	0	0	6.10051e-06	0
P01042	Kininogen-1	(K)LGQSLDCNAEVYVVPWEK(K)	17.07	<0.1%	73040.1	6.34	0	0	0	0	0	0	0	0	0	0	4.15681e-05	0
P01042	Kininogen-1	(R)QVVAGLNFR(I)	13.59	0.005	73040.1	6.34	0	0	0	0	0	0	0	0	0	0	3.29081e-05	3.5205e-05
P01871	Ig mu chain C region	(R)QIQVSWLR(E)	14.17	0.004	49990.3	6.35	0	0	0	0	0	0	0	0	0	0	6.58162e-06	0
P02652	Apolipoprotein A-II	(K)EPCVESLVSQYFQTVTDYGKDLMEK(V)	13.69	0.005	11288.9	6.27	0	0	0	0	0	0	0	0	0	0	4.15681e-05	0
P02652	Apolipoprotein A-II	(K)EQLTPLIK(K)	13.99	0.002	11288.9	6.27	0	0	0	0	0	0	0	0	0	0	2.27085e-05	0
P02671	Fibrinogen alpha chain	(K)QLEQVIAK(D)	14.47	<0.1%	95713	5.7	0	0	0	0	0	0	0	0	0	0.000199912	0	0
P02749	Beta-2-glycoprotein 1	(K)CSYTEDAQCIDGTIEVPK(C)	19.02	<0.1%	39609.7	9.11	0	0	0	0	0	0	0	0	0	0	2.55952e-05	0
P02749	Beta-2-glycoprotein 1	(K)TFYEPGEEITYSCKPGYVSR(G)	15.26	0.003	39609.7	9.11	0	0	0	0	0	0	0	0	0	0	2.38632e-05	0
P02749	Beta-2-glycoprotein 1	(R)TCPKPDDLPFSTVVPLK(T)	18.58	<0.1%	39609.7	9.11	0	0	0	0	0	0	0	0	0	0.00050903	4.5417e-05	0
P02749	Beta-2-glycoprotein 1	(R)VCPFAGILENGAVR(Y)	22.77	<0.1%	39609.7	9.11	0	0	0	0	0	0	0	0	0	0	4.38775e-05	0
P02751	Fibronectin	(K)IYLYTLNDNAR(S)	21.74	<0.1%	266214	5.46	0	0	0	0	0	0	0	0	0	0	6.63935e-05	0
P02753	Retinol-binding protein 4	(K)YWGVASFLQK(G)	18.28	<0.1%	23351.9	5.76	0	0	0	0	0	0	0	0	0	0	3.23308e-05	0
P02760	Protein AMBP	(R)EYCGVPGDGDEELLR(F)	14.55	0.003	39911.7	5.95	0	0	0	0	0	0	0	0	0	0	6.27371e-05	0
P02760	Protein AMBP	(R)TVAACNLPIVR(G)	22.43	<0.1%	39911.7	5.95	0	0	0	0	0	0	0	0	0	5.5319e-05	6.54313e-05	5.21702e-05
P02760	Protein AMBP	(R)VVAQGVGIPEDSIFTMADR(G)	16.9	<0.1%	39911.7	5.95	0	0	0	0	0	0	0	0	0	0	3.05988e-05	0
P02774	Vitamin D-binding protein	(K)EVVSLTEACCAEGADPDCYDTR(T)	27.27	<0.1%	54560.2	5.4	0	0	0	0	0	0	0	0	0	0	6.62011e-05	4.73913e-05
P02774	Vitamin D-binding protein	(K)HLSLLTTLSNR(V)	17.14	<0.1%	54560.2	5.4	0	0	0	0	0	0	0	0	0	0	0.00010546	0
P02774	Vitamin D-binding protein	(K)HQPQEFPTYVEPTNDEICEAFR(K)	20.13	<0.1%	54560.2	5.4	0	0	0	0	0	0	0	0	0	0	0	5.65509e-05
P02774	Vitamin D-binding protein	(K)SYLSMVGSCCTSASPTVCFLK(E)	19.38	<0.1%	54560.2	5.4	0	0	0	0	0	0	0	0	0	0	2.86743e-05	0
P02774	Vitamin D-binding protein	(R)KFPSGTFEQVSQLVK(E)	18.7	<0.1%	54560.2	5.4	0	0	0	0	0	0	0	0	0	0	8.83322e-06	4.14176e-05
P02774	Vitamin D-binding protein	(R)THLPEVFLSK(V)	17.69	<0.1%	54560.2	5.4	0	0	0	0	0	0	0	0	0	0	0.000143372	0.000133811
P02787	Serotransferrin	(K)ADRDQYELLCLDNTR(K)	21.12	<0.1%	79344.7	6.86	0	0	0	0	0	0	0	0	0	4.52935e-05	0.000569637	0.000175627
P02787	Serotransferrin	(K)ASYLDCIR(A)	21.16	<0.1%	79344.7	6.86	0	0	0	0	0	0	0	0	0	0	1.51839e-05	6.69053e-05
P02787	Serotransferrin	(K)CDEWSVNSVGK(I)	18.18	<0.1%	79344.7	6.86	0	0	0	0	0	0	0	0	0	0	5.13828e-05	6.01352e-05
P02787	Serotransferrin	(K)DCHLAQVPSHTVVAR(S)	21.03	<0.1%	79344.7	6.86	0	0	0	0	0	0	0	0	0	0	2.02067e-05	0
P02787	Serotransferrin	(K)DSAHGFLK(V)	19.84	<0.1%	79344.7	6.86	0	0	0	0	0	0	0	0	0	0	0.000236707	0.000379529
P02787	Serotransferrin	(K)EDLIWELLNQAQEHFGKDK(S)	18.51	<0.1%	79344.7	6.86	0	0	0	0	0	0	0	0	0	0	4.48397e-05	0
P02787	Serotransferrin	(K)IMNGEADAMSLDGGFVYIAGK(C)	19.85	<0.1%	79344.7	6.86	0	0	0	0	0	0	0	0	0	0	2.79045e-06	0
P02787	Serotransferrin	(K)KASYLDCIR(A)	13.14	0.008	79344.7	6.86	0	0	0	0	0	0	0	0	0	0	0.000248254	0
P02787	Serotransferrin	(K)KSASDLTWDNLK(G)	19.7	<0.1%	79344.7	6.86	0	0	0	0	0	0	0	0	0	0	0.000150492	0
P02787	Serotransferrin	(K)SASDLTWDNLK(G)	23.97	<0.1%	79344.7	6.86	0	0	0	0	0	0	0	0	0	7.39973e-05	0.00123742	0.000382715
P02787	Serotransferrin	(K)SCHTAVGR(T)	15.04	0.003	79344.7	6.86	0	0	0	0	0	0	0	0	0	0	7.5246e-05	0.000244523
P02787	Serotransferrin	(K)SKEFQLFSSPHGK(D)	19.64	<0.1%	79344.7	6.86	0	0	0	0	0	0	0	0	0	0	0.000152609	0
P02787	Serotransferrin	(K)WCALSHHER(L)	19.61	<0.1%	79344.7	6.86	0	0	0	0	0	0	0	0	0	0	0.000198218	0.000346872
P02787	Serotransferrin	(R)KCSTSSLLEACTFR(R)	21.11	<0.1%	79344.7	6.86	0	0	0	0	0	0	0	0	0	0	0.000139138	0
P02787	Serotransferrin	(R)KPVEEYANCHLAR(A)	21.8	<0.1%	79344.7	6.86	0	0	0	0	0	0	0	0	0	0	0.000202067	0.00016567
P02787	Serotransferrin	(R)LKCDEWSVNSVGK(I)	22	<0.1%	79344.7	6.86	0	0	0	0	0	0	0	0	0	0	0.000275196	0.000166467
P02787	Serotransferrin	(R)SMGGKEDLIWELLNQAQEHFGKDK(S)	17.91	<0.1%	79344.7	6.86	0	0	0	0	0	0	0	0	0	0	0.000174163	0
P02790	Hemopexin	(K)EVGTPHGIILDSVDAAFICPGSSR(L)	19.53	<0.1%	52417.1	6.55	0	0	0	0	0	0	0	0	0	0	8.64078e-05	0.000108721
P02790	Hemopexin	(K)LLQDEFPGIPSPLDAAVECHR(G)	26.11	<0.1%	52417.1	6.55	0	0	0	0	0	0	0	0	0	0	0.000154918	0.000292711
P02790	Hemopexin	(K)LYLVQGTQVYVFLTK(G)	16.02	<0.1%	52417.1	6.55	0	0	0	0	0	0	0	0	0	0	1.57228e-05	0
P02790	Hemopexin	(K)VDGALCMEK(S)	16.08	0.006	52417.1	6.55	0	0	0	0	0	0	0	0	0	0	2.79045e-05	5.65509e-05
P02790	Hemopexin	(R)QGHNSVFLIK(G)	15.59	<0.1%	52417.1	6.55	0	0	0	0	0	0	0	0	0	0	7.5246e-05	0
P02790	Hemopexin	(R)YYCFQGNQFLR(F)	24.92	<0.1%	52417.1	6.55	0	0	0	0	0	0	0	0	0	0	0.000284819	0
P03952	Plasma kallikrein	(R)VLTPDAFVCR(T)	14.28	0.004	73479.4	9.39	0	0	0	0	0	0	0	0	0	0	3.07912e-05	0
P04114	Apolipoprotein B-100	(K)ALVEQGFTVPEIK(T)	23.31	<0.1%	516964	6.59	0	0	0	0	0	0	0	0	0	0	5.42695e-05	2.42134e-05
P04114	Apolipoprotein B-100	(K)ALYWVNGQVPDGVSK(V)	18.92	<0.1%	516964	6.59	0	0	0	0	0	0	0	0	0	0	2.32858e-06	0
P04114	Apolipoprotein B-100	(K)ATGVLYDYVNK(Y)	16.17	0.006	516964	6.59	0	0	0	0	0	0	0	0	0	0	0	3.9745e-05
P04114	Apolipoprotein B-100	(K)ESQLPTVMDFR(K)	19.29	<0.1%	516964	6.59	0	0	0	0	0	0	0	0	0	0	6.71633e-05	1.98327e-05
P04114	Apolipoprotein B-100	(K)FIIPGLK(L)	13.71	0.004	516964	6.59	0	0	0	0	0	0	0	0	0	0	1.91483e-05	0
P04114	Apolipoprotein B-100	(K)FPEVDVLTK(Y)	18.8	<0.1%	516964	6.59	0	0	0	0	0	0	0	0	0	3.28214e-05	6.98575e-05	0
P04114	Apolipoprotein B-100	(K)IADFELPTIIVPEQTIEIPSIK(F)	16.02	<0.1%	516964	6.59	0	0	0	0	0	0	0	0	0	0	1.98218e-05	1.49342e-05
P04114	Apolipoprotein B-100	(K)IAELSATAQEIIK(S)	20.93	<0.1%	516964	6.59	0	0	0	0	0	0	0	0	0	0	7.25518e-05	4.26123e-05
P04114	Apolipoprotein B-100	(K)IAIANIIDEIIEK(L)	13.69	0.003	516964	6.59	0	0	0	0	0	0	0	0	0	0	7.58233e-06	0
P04114	Apolipoprotein B-100	(K)IDDIWNLEVK(E)	16.55	<0.1%	516964	6.59	0	0	0	0	0	0	0	0	0	0	3.8489e-05	0
P04114	Apolipoprotein B-100	(K)LIVAMSSWLQK(A)	16.2	<0.1%	516964	6.59	0	0	0	0	0	0	0	0	0	0	5.52317e-06	0
P04114	Apolipoprotein B-100	(K)LLSGGNTLHLVSTTK(T)	18.32	<0.1%	516964	6.59	0	0	0	0	0	0	0	0	0	0	0	6.05334e-05
P04114	Apolipoprotein B-100	(K)LSLPDFK(E)	16.65	<0.1%	516964	6.59	0	0	0	0	0	0	0	0	0	0	2.55952e-05	0
P04114	Apolipoprotein B-100	(K)MTSNFPVDLSDYPK(S)	14.13	0.002	516964	6.59	0	0	0	0	0	0	0	0	0	0	4.42623e-05	0
P04114	Apolipoprotein B-100	(K)NFVASHIANILNSEELDIQDLKK(L)	12.55	0.005	516964	6.59	0	0	0	0	0	0	0	0	0	0	4.94584e-05	0
P04114	Apolipoprotein B-100	(K)SVSDGIAALDLNAVANK(I)	22.69	<0.1%	516964	6.59	0	0	0	0	0	0	0	0	0	0	7.60158e-05	3.37713e-05
P04114	Apolipoprotein B-100	(K)TEVIPPLIENR(Q)	18.76	<0.1%	516964	6.59	0	0	0	0	0	0	0	0	0	7.04168e-05	8.52531e-05	6.29229e-05
P04114	Apolipoprotein B-100	(K)VELEVPQLCSFILK(T)	15.84	<0.1%	516964	6.59	0	0	0	0	0	0	0	0	0	0	2.40556e-05	0
P04114	Apolipoprotein B-100	(K)VNWEEEAASGLLTSLK(D)	25.21	<0.1%	516964	6.59	0	0	0	0	0	0	0	0	0	0	3.81041e-05	0
P04114	Apolipoprotein B-100	(K)VSALLTPAEQTGTWK(L)	15.42	0.003	516964	6.59	0	0	0	0	0	0	0	0	0	0	8.5638e-05	0
P04114	Apolipoprotein B-100	(R)EELCTMFIR(E)	12.35	0.007	516964	6.59	0	0	0	0	0	0	0	0	0	0	2.23236e-05	0
P04114	Apolipoprotein B-100	(R)EFQVPTFTIPK(L)	19.15	<0.1%	516964	6.59	0	0	0	0	0	0	0	0	0	0	6.15824e-05	0
P04114	Apolipoprotein B-100	(R)EYSGTIASEANTYLNSK(S)	18.4	<0.1%	516964	6.59	0	0	0	0	0	0	0	0	0	0	3.59872e-05	0
P04114	Apolipoprotein B-100	(R)ILGEELGFASLHDLQLLGK(L)	13.8	0.002	516964	6.59	0	0	0	0	0	0	0	0	0	0	1.10463e-05	0
P04114	Apolipoprotein B-100	(R)ITENDIQIALDDAK(I)	23.96	<0.1%	516964	6.59	0	0	0	0	0	0	0	0	0	0	7.58233e-05	6.33211e-06
P04114	Apolipoprotein B-100	(R)ITLPDFR(L)	18.07	<0.1%	516964	6.59	0	0	0	0	0	0	0	0	0	0	4.7149e-05	0
P04114	Apolipoprotein B-100	(R)LAAYLMLMR(S)	19.85	<0.1%	516964	6.59	0	0	0	0	0	0	0	0	0	0	1.5896e-05	0
P04114	Apolipoprotein B-100	(R)NIQEYLSILTDPDGK(G)	24.86	<0.1%	516964	6.59	0	0	0	0	0	0	0	0	0	0	2.69423e-05	0
P04114	Apolipoprotein B-100	(R)NLQNNAEWVYQGAIR(Q)	22.13	<0.1%	516964	6.59	0	0	0	0	0	0	0	0	0	0	3.8489e-05	0
P04114	Apolipoprotein B-100	(R)QTIIVVLENVQR(N)	15.44	<0.1%	516964	6.59	0	0	0	0	0	0	0	0	0	0	1.60307e-05	0
P04114	Apolipoprotein B-100	(R)TGISPLALIK(G)	19.22	<0.1%	516964	6.59	0	0	0	0	0	0	0	0	0	0	5.09979e-05	7.80562e-05
P04114	Apolipoprotein B-100	(R)TSSFALNLPTLPEVK(F)	16.95	<0.1%	516964	6.59	0	0	0	0	0	0	0	0	0	0	6.67784e-05	0
P04114	Apolipoprotein B-100	(R)VIGNMGQTMEQLTPELK(S)	26.07	<0.1%	516964	6.59	0	0	0	0	0	0	0	0	0	0	0.000116044	0
P04217	Alpha-1B-glycoprotein	(K)VTLTCVAPLSGVDFQLR(R)	16.27	<0.1%	54823	5.56	0	0	0	0	0	0	0	0	0	0	9.33358e-06	0
P04217	Alpha-1B-glycoprotein	(R)GVTFLLR(R)	12.56	0.005	54823	5.56	0	0	0	0	0	0	0	0	0	0	4.21455e-05	0
P04217	Alpha-1B-glycoprotein	(R)SGLSTGWTQLSK(L)	18.77	<0.1%	54823	5.56	0	0	0	0	0	0	0	0	0	0	0.00011489	6.53124e-05
P04217	Alpha-1B-glycoprotein	(R)TDGEGALSEPSATVTIEELAAPPPPVLMHHGESSQVLHPGNK(V)	19.39	<0.1%	54823	5.56	0	0	0	0	0	0	0	0	0	0.000176042	0	5.77457e-05
P04264	Keratin, type II cytoskeletal 1	(K)LNDLEDALQQAK(E)	16.88	<0.1%	66208.7	8.32	0	0	0	0	0	0	0	0	0	5.28126e-05	0	0
P04264	Keratin, type II cytoskeletal 1	(R)DYQELMNTK(L)	16.1	<0.1%	66208.7	8.32	0	0	0	0	0	0	0	0	0	5.2932e-05	0	0
P04264	Keratin, type II cytoskeletal 1	(R)TLLEGEESR(M)	16.73	<0.1%	66208.7	8.32	0	0	0	0	0	0	0	0	0	0.000171865	0	0
P05155	Plasma protease C1 inhibitor	(K)FPVFMGR(V)	17.3	<0.1%	55381.4	6.09	0	0	0	0	0	0	0	0	0	0	4.42623e-05	0
P05155	Plasma protease C1 inhibitor	(K)KYPVAHFIDQTLK(A)	15.82	<0.1%	55381.4	6.09	0	0	0	0	0	0	0	0	0	0	2.30934e-05	0
P05155	Plasma protease C1 inhibitor	(R)LVLLNAIYLSAK(W)	22.71	<0.1%	55381.4	6.09	0	0	0	0	0	0	0	0	0	0	3.61797e-05	0
P05155	Plasma protease C1 inhibitor	(R)TLLVFEVQQPFLFVLWDQQHKFPVFMGR(V)	18.33	<0.1%	55381.4	6.09	0	0	0	0	0	0	0	0	0	0	4.5417e-05	0
P05156	Complement factor I	(R)AQLGDLPWQVAIK(D)	15.52	<0.1%	68145.4	8.52	0	0	0	0	0	0	0	0	0	0	3.3293e-06	0
P05231	Interleukin-6	(-)mNSFSTSAFGPVAFSLGLLLVLPAAFPAPVPPGEDSKDVAAPHRQPLTSSER(I)	14.72	0.007	23946	6.18	0	0	0	0	0	0	0	0	0	1.4143e-05	0	0
P05452	Tetranectin	(R)LDTLAQEVALLK(E)	17.58	<0.1%	22935.8	5.53	0	0	0	0	0	0	0	0	0	0	1.78974e-05	0
P05546	Heparin cofactor 2	(R)IAIDLFK(H)	14.47	0.003	57240.8	6.41	0	0	0	0	0	0	0	0	0	0	1.48952e-05	0
P06396	Gelsolin	(K)AGALNSNDAFVLK(T)	14.59	0.003	86095.3	5.9	0	0	0	0	0	0	0	0	0	0	3.59872e-05	0
P06396	Gelsolin	(K)QTQVSVLPEGGETPLFK(Q)	17.18	<0.1%	86095.3	5.9	0	0	0	0	0	0	0	0	0	0	5.69637e-05	0
P06396	Gelsolin	(R)AQPVQVAEGSEPDGFWEALGGK(A)	20.93	<0.1%	86095.3	5.9	0	0	0	0	0	0	0	0	0	0	1.98218e-05	0
P08603	Complement factor H	(K)SCDIPVFMNAR(T)	18.31	<0.1%	143772	6.22	0	0	0	0	0	0	0	0	0	0	8.31362e-05	0
P19823	Inter-alpha-trypsin inhibitor heavy chain H2	(K)FYNQVSTPLLR(N)	15.55	<0.1%	106918	6.4	0	0	0	0	0	0	0	0	0	0	1.19701e-05	0
P19823	Inter-alpha-trypsin inhibitor heavy chain H2	(K)IQPSGGTNINEALLR(A)	18.29	<0.1%	106918	6.4	0	0	0	0	0	0	0	0	0	0	3.94512e-05	8.32334e-05
P19823	Inter-alpha-trypsin inhibitor heavy chain H2	(K)VQFELHYQEVK(W)	18.17	<0.1%	106918	6.4	0	0	0	0	0	0	0	0	0	0	5.29224e-05	0
P19823	Inter-alpha-trypsin inhibitor heavy chain H2	(R)ETAVDGELVVLYDVK(R)	12.68	0.004	106918	6.4	0	0	0	0	0	0	0	0	0	0	2.52103e-06	0
P19823	Inter-alpha-trypsin inhibitor heavy chain H2	(R)FLHVPDTFEGHFDGVPVISK(G)	16.57	<0.1%	106918	6.4	0	0	0	0	0	0	0	0	0	0	0.000100649	0
P19823	Inter-alpha-trypsin inhibitor heavy chain H2	(R)MLADAPPQDPSCCSGALYYGSK(V)	23.1	<0.1%	106918	6.4	0	0	0	0	0	0	0	0	0	0	5.11904e-05	0
P19823	Inter-alpha-trypsin inhibitor heavy chain H2	(R)SILQMSLDHHIVTPLTSLVIENEAGDER(M)	14.05	0.003	106918	6.4	0	0	0	0	0	0	0	0	0	0	3.61797e-05	0
P19823	Inter-alpha-trypsin inhibitor heavy chain H2	(R)SSALDMENFR(T)	19.52	<0.1%	106918	6.4	0	0	0	0	0	0	0	0	0	0	1.60499e-05	4.89843e-05
P19827	Inter-alpha-trypsin inhibitor heavy chain H1	(K)GSLVQASEANLQAAQDFVR(G)	27.47	<0.1%	101844	6.31	0	0	0	0	0	0	0	0	0	0	0.000160499	2.82356e-05
P19827	Inter-alpha-trypsin inhibitor heavy chain H1	(K)LDAQASFLPK(E)	16.77	0.004	101844	6.31	0	0	0	0	0	0	0	0	0	0	4.3685e-05	7.40738e-05
P19827	Inter-alpha-trypsin inhibitor heavy chain H1	(R)EVAFDLEIPK(T)	18.51	<0.1%	101844	6.31	0	0	0	0	0	0	0	0	0	0	4.8881e-05	0
P19827	Inter-alpha-trypsin inhibitor heavy chain H1	(R)FAHYVVTSQVVNTANEAR(E)	19.56	<0.1%	101844	6.31	0	0	0	0	0	0	0	0	0	0	4.40699e-05	0
P19827	Inter-alpha-trypsin inhibitor heavy chain H1	(R)GFSLDEATNLNGGLLR(G)	15.21	<0.1%	101844	6.31	0	0	0	0	0	0	0	0	0	0	2.65574e-06	0
P19827	Inter-alpha-trypsin inhibitor heavy chain H1	(R)QAVDTAVDGVFIR(S)	13.23	0.003	101844	6.31	0	0	0	0	0	0	0	0	0	0	3.96437e-05	0
P22792	Carboxypeptidase N subunit 2	(K)LSNNALSGLPQGVFGK(L)	17.39	<0.1%	61411.3	5.63	0	0	0	0	0	0	0	0	0	0	1.46836e-05	0
P35858	Insulin-like growth factor-binding protein complex acid labile subunit	(R)LEALPNSLLAPLGR(L)	13.53	0.005	66775.5	6.33	0	0	0	0	0	0	0	0	0	0	1.45104e-05	0
P35908	Keratin, type II cytoskeletal 2 epidermal	(K)IEISELNR(V)	14.66	0.006	65717	8.32	0	0	0	0	0	0	0	0	0	0.000100851	0	0
P35908	Keratin, type II cytoskeletal 2 epidermal	(R)NLDLDSIIAEVK(A)	14.81	0.002	65717	8.32	0	0	0	0	0	0	0	0	0	0	1.87441e-05	0
P41180	Extracellular calcium-sensing receptor	(K)LPENFNEAKFITFSMLIFFIVWISFIPAYASTYGKFVSAVEVIAILAASFGLLACIFFNK(I)	18.83	<0.1%	122668	5.66	0	0	0	0	0	0	0	0	0	0	0	9.95615e-06
P43652	Afamin	(K)IAPQLSTEELVSLGEK(M)	15.75	<0.1%	71007.7	5.64	0	0	0	0	0	0	0	0	0	0	2.27085e-05	0
P68871	Hemoglobin subunit beta	(K)EFTPPVQAAYQK(V)	21.08	<0.1%	16112.2	6.75	0	0	0	0	0	0	0	0	0	0	0	2.60851e-06
P68871	Hemoglobin subunit beta	(K)GTFATLSELHCDK(L)	21.18	<0.1%	16112.2	6.75	0	0	0	0	0	0	0	0	0	0	1.94369e-05	0.000209079
P68871	Hemoglobin subunit beta	(K)SAVTALWGK(V)	19.59	<0.1%	16112.2	6.75	0	0	0	0	0	0	0	0	0	0	1.20663e-05	4.97808e-05
P68871	Hemoglobin subunit beta	(K)VLGAFSDGLAHLDNLK(G)	25.81	<0.1%	16112.2	6.75	0	0	0	0	0	0	0	0	0	0	1.33364e-05	1.04739e-05
P68871	Hemoglobin subunit beta	(R)LLVVYPWTQR(F)	17.71	<0.1%	16112.2	6.75	0	0	0	0	0	0	0	0	0	0	4.98433e-05	1.10712e-05
P69905	Hemoglobin subunit alpha	(K)KVADALTNAVAHVDDMPNALSALSDLHAHK(L)	15.72	<0.1%	15314.3	8.9	0	0	0	0	0	0	0	0	0	0	6.15824e-05	7.80562e-05
P69905	Hemoglobin subunit alpha	(K)TYFPHFDLSHGSAQVK(G)	18.33	<0.1%	15314.3	8.9	0	0	0	0	0	0	0	0	0	0	4.96508e-05	0
P69905	Hemoglobin subunit alpha	(K)VGAHAGEYGAEALER(M)	18.89	<0.1%	15314.3	8.9	0	0	0	0	0	0	0	0	0	0	0	4.8586e-05
P69905	Hemoglobin subunit alpha	(R)MFLSFPTTK(T)	17.92	<0.1%	15314.3	8.9	0	0	0	0	0	0	0	0	0	9.18999e-05	0.000149337	0.000196734
P78363	Retinal-specific ATP-binding cassette transporter	(K)LSVAIAFVGDAK(V)	12.03	0.009	258392	5.89	0	0	0	0	0	0	0	0	0	0	1.30093e-05	0
P80748	Ig lambda chain V-III region LOI	(-)YVLTQPPSVSVAPGETARLTCGGNDIGSESVHWYQQKPGQAPVLVIYFDRDRPSGIPER(F)	12.93	0.007	12049	4.94	0	0	0	0	0	0	0	0	0	0	1.49337e-05	0
Q04828	Aldo-keto reductase family 1 member C1	(K)LWCNSHRPELVRPALERSLKNLQLDYVDLYLIHFPVSVKPGEEVIPK(D)	17.02	<0.1%	37244.1	8.43	0	0	0	0	0	0	0	0	0	0	8.27513e-06	0
Q13410	Butyrophilin subfamily 1 member A1	(K)KPLTICPIADGPERVTVIANAQDLSKEIPLSPmGEDSAPR(D)	14.59	<0.1%	59529.6	5.38	0	0	0	0	0	0	0	0	0	0	0	0.000104739
Q14126	Desmoglein-2	(K)IVAISEDYPRKTITGTVLINVEDINDNCPTLIEPVQTICHDAEYVNVTAEDLDGHPNSGPFSFSVIDKPPGmAEK(W)	13.09	0.008	123090	5.13	0	0	0	0	0	0	0	0	0	0	1.89173e-05	0
Q14624	Inter-alpha-trypsin inhibitor heavy chain H4	(K)ETLFSVMPGLK(M)	14.82	0.002	103584	6.52	0	0	0	0	0	0	0	0	0	0	4.81112e-05	0
Q14624	Inter-alpha-trypsin inhibitor heavy chain H4	(R)QGPVNLLSDPEQGVEVTGQYER(E)	16.44	<0.1%	103584	6.52	0	0	0	0	0	0	0	0	0	0	3.42552e-05	0
Q2KJY2	Kinesin-like protein KIF26B	(R)LHLIDLGSCVK(A)	13.34	0.003	226618	9.31	0	0	0	0	0	0	0	0	0	0	0.000181091	0
Q6ZRS4	Coiled-coil domain-containing protein 129	(R)EILKCTKSAWAPLDEWLPPDPEEESQSLTIPmLEDSK(Q)	16.64	0.005	117284	5.18	0	0	0	0	0	0	0	0	0	0	0	3.71564e-06
Q7L5N1	COP9 signalosome complex subunit 6	(-)mAAAAAAAAATNGTGGSSGMEVDAAVVPSVmACGVTGSVSVALHPLVILNISDHWIRmRSQEGRPVQVIGALIGK(Q)	14.8	<0.1%	36505.2	5.47	0	0	0	0	0	0	0	0	0	0.000104432	0	0
Q86XX4	Extracellular matrix protein FRAS1	(R)VEKNVNRHYCTVR(N)	15.15	<0.1%	454502	5.32	0	0	0	0	0	0	0	0	0	0	1.53379e-05	0
Q8N2C7	Protein unc-80 homolog	(K)AAPILTEEMYGDIQPAAWELLLSMDEHMAGAAAAmFLLCAVKVPEAVSDMLmSEFHHPETVQRLNAVLK(F)	12.62	0.005	367378	6.41	0	0	0	0	0	0	0	0	0	0	1.67427e-05	0
Q8N4A0	Polypeptide N-acetylgalactosaminyltransferase 4	(K)EDGTIFHPHSGLCLSAYRTPEGRPDVQmRTCDALDK(N)	13.61	0.007	67520.4	7.85	0	0	0	0	0	0	0	0	0	0	0	2.07088e-05
Q8ND23	Leucine-rich repeat-containing protein 16B	(R)KIRPVSAFISGSPQDmESQLGNLGIPPGWFSGLGGSQPTASGSWEGLSELPTHGYK(L)	17.67	0.004	151825	7.29	0	0	0	0	0	0	0	0	0	0	0	0.000272799
Q92736	Ryanodine receptor 2	(K)YmPGLLRAGYYDLLIDIHLSSYATARLmmNNEYIVPmTEETK(S)	12.7	0.009	569692	5.73	0	0	0	0	0	0	0	0	0	0	4.1953e-05	0
Q92995	Ubiquitin carboxyl-terminal hydrolase 13	(R)KAVYFTGNMGAEVAFNWIIVHmEEPDFAEPLTMPGYGGAASAGASVFGASGLDNQPPEEIVAIITSmGFQRNQAIQALR(A)	12.88	0.008	98067.1	5.34	0	0	0	0	0	0	0	0	0	0	9.79545e-06	0
Q96BD5	PHD finger protein 21A	(K)TLPLVLKAATATMPASVVGQRPTIAmVTAINSQKAVLSTDVQNTPVNLQTSSK(V)	15.9	0.004	75480.3	9.78	0	0	0	0	0	0	0	0	0	0	0	9.35878e-06
Q96JG9	Zinc finger protein 469	(K)MPRVTCPSTGLGLGR(T)	12.56	0.005	414416	8.47	0	0	0	0	0	0	0	0	0	0	3.13685e-05	0
Q96SZ5	2-aminoethanethiol dioxygenase	(R)ISCMDKLDAGGGQRPRALPPEQQFEPPLQPR(E)	13.45	0.003	30092.7	5.68	0	0	0	0	0	0	0	0	0	0	3.42552e-06	0
Q9H0R3	Transmembrane protein 222	(K)HRMHNLCCDNCHSHVALALNLMRYNNSTNWNMVTLCFFCLLYGK(Y)	13.97	0.005	23628.9	6.04	0	0	0	0	0	0	0	0	0	0	0	5.29667e-05
Q9H2B2	Synaptotagmin-4	(R)DLNGNFPK(T)	13.6	0.005	48356.7	9.02	0	0	0	0	0	0	0	0	0	0	2.8097e-05	0
Q9HD43	Receptor-type tyrosine-protein phosphatase H	(K)QQKPELRDLVFSSPGDIPAEDFADHVR(K)	12.86	0.004	123491	5.21	0	0	0	0	0	0	0	0	0	0	9.0834e-06	0
Q9NSI6	Bromodomain and WD repeat-containing protein 1	(K)GEEERNLYIIGR(K)	13.32	0.008	265670	9.16	0	0	0	0	0	0	0	0	0	0	0.000213614	0
Q9P1Q0	Vacuolar protein sorting-associated protein 54	(R)NASPNSEPCSSDSVSEPECTTDSSSSKEHTSSSAIPGGVDIMVSEDMK(L)	13.78	0.003	111614	6.1	0	0	0	0	0	0	0	0	0	0	1.6608e-05	0
Q9Y2I2	Netrin-G1	(R)TWQPYQYYATDCLDAFHmDPKSVKDLSQHTVLEIICTEEYSTGYTTNSK(I)	13.91	0.005	62822	5.84	0	0	0	0	0	0	0	0	0	0	0	2.96693e-05
Q9Y2K3	Myosin-15	(K)MDLSDLGEAAAFLR(R)	12.95	0.003	226041	5.67	0	0	0	0	0	0	0	0	0	0	2.55952e-05	0
Q9Y566	SH3 and multiple ankyrin repeat domains protein 1	(K)LRGRALGASGGLRPGPSGGLR(D)	13.52	0.007	225754	8.59	0	0	0	0	0	0	0	0	0	0	1.18931e-05	0
B9A064	Immunoglobulin lambda-like polypeptide 5	(K)YAASSYLSLTPEQWK(S)	22.17	<0.1%	23405.2	9.65	0	2.46182e-05	0	0	7.24209e-05	4.12056e-05	0	0	8.50016e-05	0	0	0
P01766	Ig heavy chain V-III region BRO	(-)EVQLVESGGGLVQPGGSLR(L)	25	<0.1%	13340.6	6.46	0	0	1.40606e-05	0.000113641	0.000305034	6.72744e-05	0.000100485	0	2.06345e-05	0	0	0
P01834	Ig kappa chain C region	(K)DSTYSLSSTLTLSK(A)	20.87	<0.1%	11779.8	5.58	9.61391e-05	0.000596804	0.00052314	4.43201e-05	6.73042e-05	0.000589252	7.68201e-05	0	0.000134586	0	0	0
P01834	Ig kappa chain C region	(K)VDNALQSGNSQESVTEQDSK(D)	27	<0.1%	11779.8	5.58	3.79898e-05	0	2.33371e-05	0.000198601	1.43268e-05	1.70589e-05	0.000222815	0	3.77272e-05	0	0	0
P01857	Ig gamma-1 chain C region	(K)GPSVFPLAPSSK(S)	19.03	<0.1%	36618.7	8.92	0.00011435	0	8.4208e-05	0.00128252	2.44027e-05	0.000228853	0.00038228	0.000189626	6.6523e-05	0	0	0
P01857	Ig gamma-1 chain C region	(K)STSGGTAALGCLVK(D)	23.7	<0.1%	36618.7	8.92	4.27755e-05	0	4.49239e-05	0.00116347	0.00039556	0.000201223	0.000418688	4.4411e-05	3.34155e-05	0	0	0
P01857	Ig gamma-1 chain C region	(R)TPEVTCVVVDVSHEDPEVK(F)	27.33	<0.1%	36618.7	8.92	8.17394e-05	0	0	0.000649378	0.000307002	5.40598e-05	0.00026796	7.47512e-05	0.000111642	0	0	0
P01859	Ig gamma-2 chain C region	(R)STSESTAALGCLVK(D)	24.06	<0.1%	36527.6	8.02	0	0	4.16178e-05	0.000741373	0.000517574	0.000151367	0.000219174	7.14534e-05	0	0	0	0
P02768	Serum albumin	(K)AAFTECCQAADK(A)	27	<0.1%	71362.3	5.92	0.000107151	0	4.66742e-05	0.000936187	0.000110403	1.85005e-05	0.000104854	0	4.48107e-05	0	0	0
P02768	Serum albumin	(K)ADDKETCFAEEGKK(L)	21.93	<0.1%	71362.3	5.92	0	2.89876e-05	5.9704e-05	0.000267868	0.000586452	0.000112324	5.89804e-05	0	4.40407e-05	0	0	0
P02768	Serum albumin	(K)FQNALLVR(Y)	18.67	<0.1%	71362.3	5.92	0.000216419	3.78331e-05	0.000289769	0.00211589	3.83752e-06	0.000120734	0.000291989	9.28894e-05	6.17494e-05	0	0	0
P02768	Serum albumin	(K)LCTVATLR(E)	16.58	<0.1%	71362.3	5.92	6.60691e-05	0	6.68996e-05	0.000622321	8.56063e-05	2.41467e-05	0.000207888	0	0	0	0	0
P02768	Serum albumin	(K)LVAASQAALGL(-)	17.5	<0.1%	71362.3	5.92	0.000361263	8.63235e-06	6.88444e-05	0.000898306	1.81052e-05	8.2291e-05	0.000167111	0	2.741e-05	0	0	0
P02768	Serum albumin	(K)QNCELFEQLGEYK(F)	25.18	<0.1%	71362.3	5.92	4.36226e-05	0.000166253	0.000373393	0.000253257	2.30251e-05	0.00111123	0.000116869	0	0.000252541	0	0	0
P02768	Serum albumin	(K)QTALVELVK(H)	19.96	<0.1%	71362.3	5.92	0.000341781	0.000133215	0.000340333	0.00106606	0.000122407	1.94615e-05	0.000225727	8.40951e-05	2.87958e-05	0	0	0
P02768	Serum albumin	(K)RMPCAEDYLSVVLNQLCVLHEK(T)	26.22	<0.1%	71362.3	5.92	0	8.13146e-05	8.7903e-05	0	0.000651395	4.57706e-05	0	0	2.29443e-05	0	0	0
P02768	Serum albumin	(K)SLHTLFGDK(L)	21.84	<0.1%	71362.3	5.92	0.000145691	1.46004e-05	8.7903e-05	0.000449153	0.000261739	0.000211434	0.000223179	0	0	0	0	0
P02768	Serum albumin	(K)TCVADESAENCDK(S)	21.15	<0.1%	71362.3	5.92	7.83512e-05	1.40675e-05	3.16995e-05	0.000557383	0.00058842	1.12324e-05	3.11285e-05	0	2.29443e-05	0	0	0
P02768	Serum albumin	(K)VHTECCHGDLLECADDRADLAK(Y)	17.02	<0.1%	71362.3	5.92	0.000136373	0	0.00019642	0.00153686	0.000195615	2.27051e-05	0	9.50879e-05	0	0	0	0
P02768	Serum albumin	(K)YICENQDSISSK(L)	25.58	<0.1%	71362.3	5.92	0.000124515	0	7.48732e-05	0.00121217	0.000102924	6.96771e-05	0.00015	2.16559e-05	5.99015e-05	0	0	0
P02768	Serum albumin	(K)YLYEIAR(R)	18.06	<0.1%	71362.3	5.92	9.57155e-05	1.74778e-05	0.000109295	0.00144487	0.000247963	7.98884e-05	0.000188228	0	0	0	0	0
P02768	Serum albumin	(R)LVRPEVDVMCTAFHDNEETFLK(K)	24.2	<0.1%	71362.3	5.92	0.000134679	0.000158793	0.000133021	0.000526537	0.00021254	1.11123e-05	0	0	1.41515e-05	0	0	0
P02768	Serum albumin	(R)MPCAEDYLSVVLNQLCVLHEK(T)	25.72	<0.1%	71362.3	5.92	0	4.92364e-05	0.000243095	0	5.1167e-05	6.06671e-05	0	0	4.69665e-05	0	0	0
P02768	Serum albumin	(R)RPCFSALEVDETYVPK(E)	21.22	<0.1%	71362.3	5.92	0.000282064	5.69096e-05	0.000252818	0.00106606	0.000924941	6.18684e-05	0.000122694	8.24462e-05	0.000127194	0	0	0
B9A064	Immunoglobulin lambda-like polypeptide 5	(K)ANPTVTLFPPSSEELQANK(A)	19.66	<0.1%	23405.2	9.65	0	0	0	0	4.50663e-05	1.31546e-05	0	0	2.43302e-05	0	0	0
B9A064	Immunoglobulin lambda-like polypeptide 5	(R)SYSCQVTHEGSTVEK(T)	22.24	<0.1%	23405.2	9.65	0	0	0	0	2.93226e-05	4.0725e-05	0.000126335	0	5.28181e-05	0	0	0
P01614	Ig kappa chain V-II region Cum	(R)FSGSGSGTDFTLK(I)	18.28	<0.1%	12790.1	5.27	0	0	0	3.79886e-05	0	7.26804e-06	3.53882e-05	0	0	0	0	0
P01625	Ig kappa chain V-IV region Len	(-)DIVMTQSPDSLAVSLGER(A)	24.46	<0.1%	12753.9	8.12	0	0	0	0	0.000165112	8.10897e-07	0	0	1.0964e-06	0	0	0
P01765	Ig heavy chain V-III region TIL	(-)EVQLLESGGGLVQPGGSLR(L)	21.75	<0.1%	12472.7	5.02	0	0	0	4.3346e-05	0.000119652	2.79309e-05	2.95266e-05	0	2.46382e-05	0	0	0
P01857	Ig gamma-1 chain C region	(K)ALPAPIEK(T)	18.28	<0.1%	36618.7	8.92	0	0	0	0.00054656	1.79084e-05	2.65494e-05	0.000206795	3.61114e-05	0	0	0	0
P01857	Ig gamma-1 chain C region	(K)FNWYVDGVEVHNAK(T)	25.01	<0.1%	36618.7	8.92	0	0	0	0.000203472	0.000411304	6.30698e-05	0	0	9.56269e-05	0	0	0
P01857	Ig gamma-1 chain C region	(K)THTCPPCPAPELLGGPSVFLFPPKPK(D)	19.76	<0.1%	36618.7	8.92	0	0	0	0.000107689	0.000200732	2.1684e-05	0	0	7.91501e-06	0	0	0
P01857	Ig gamma-1 chain C region	(R)EPQVYTLPPSR(D)	18.49	<0.1%	36618.7	8.92	0	0	0	0.000340924	5.51029e-05	3.37573e-05	4.07766e-05	0	0	0	0	0
P01857	Ig gamma-1 chain C region	(R)VVSVLTVLHQDWLNGK(E)	25.94	<0.1%	36618.7	8.92	0	0	0	0	0.000140119	0.00028892	0.000164927	0	2.78719e-06	0	0	0
P01857	Ig gamma-1 chain C region	(R)WQQGNVFSCSVMHEALHNHYTQK(S)	17.76	<0.1%	36618.7	8.92	0	0	0	0	0.000104892	5.424e-05	0	0	9.3933e-05	0	0	0
P01859	Ig gamma-2 chain C region	(K)GPSVFPLAPCSR(S)	19.53	<0.1%	36527.6	8.02	0	0	0	0.000763019	0.000387688	0.000339375	0.000258494	0.000120921	4.54266e-05	0	0	0
P01859	Ig gamma-2 chain C region	(K)TTPPMLDSDGSFFLYSK(L)	24.54	<0.1%	36527.6	8.02	0	0	0	0	0.000521509	0.000118932	0	0	7.37605e-05	0	0	0
P01859	Ig gamma-2 chain C region	(R)VVSVLTVVHQDWLNGK(E)	25	<0.1%	36527.6	8.02	0	0	0	6.33144e-06	0.000525445	4.75126e-05	5.57037e-05	0	0	0	0	0
P01871	Ig mu chain C region	(K)GVALHRPDVYLLPPAR(E)	13.39	0.002	49990.3	6.35	0	0	0	3.66899e-05	2.53867e-05	3.60999e-05	0.00013216	4.22674e-05	0	0	0	0
P01871	Ig mu chain C region	(R)DGFFGNPR(K)	15.38	0.002	49990.3	6.35	0	0	0	5.21667e-05	0	0	0.000156189	0	0	0	0	0
P01871	Ig mu chain C region	(R)FTCTVTHTDLPSPLK(Q)	16.97	<0.1%	49990.3	6.35	0	0	0	0.000241893	0	0	0.000301819	0	0	0	0	0
P01876	Ig alpha-1 chain C region	(R)DASGVTFTWTPSSGK(S)	20.77	<0.1%	38509.8	6.08	0	0	0	2.8248e-05	8.52127e-05	7.6885e-05	2.20266e-05	0	1.66308e-05	0	0	0
P01876	Ig alpha-1 chain C region	(R)QEPSQGTTTFAVTSILR(V)	24.52	<0.1%	38509.8	6.08	0	0	0	0	0.000117094	6.36704e-05	0	0	3.09517e-05	0	0	0
P01876	Ig alpha-1 chain C region	(R)WLQGSQELPR(E)	21.12	<0.1%	38509.8	6.08	0	0	0	8.98306e-05	0.000108435	5.3339e-05	5.31552e-05	0	3.60333e-06	0	0	0
P02675	Fibrinogen beta chain	(R)VYCDMNTENGGWTVIQNR(Q)	29	<0.1%	56611.8	8.98	0	0	0	0	0	2.40866e-06	9.57521e-06	1.14875e-05	0.000151987	0	0	0
P04220	Ig mu heavy chain disease protein	(R)YFAHSILTVSEEEWNTGETYTCVVAHEALPNR(V)	20.18	<0.1%	43570	5.12	0	0	0	0	8.61967e-05	0	0	0	4.12689e-05	0	0	0
P08603	Complement factor H	(R)EIMENYNIALR(W)	20.08	<0.1%	143772	6.22	0	0	0	0	0	8.2291e-06	5.57037e-05	0	7.992e-05	0	0	0
Q99758	ATP-binding cassette sub-family A member 3	(K)DALQAEGQEPR(E)	16.89	<0.1%	192956	7.8	0	0	0	4.54024e-05	0	0	0	0	3.60333e-06	0	0	0
P02671	Fibrinogen alpha chain	(R)HPDEAAFFDTASTGK(T)	24.76	<0.1%	95713	5.7	0	0	2.54763e-05	0	0	0	0.000629852	0.000161045	0.000278719	0	0	0
P02766	Transthyretin	(K)TSESGELHGLTTEEEFVEGIYKVEIDTK(S)	23.07	<0.1%	16000.8	5.52	0	0.000108704	0.000166277	0	0	0	0	0.00019952	0	0	0	0
P06727	Apolipoprotein A-IV	(K)IDQNVEELK(G)	21.37	<0.1%	45398.2	5.28	0.000251994	0	1.2427e-05	0	0	0	8.26454e-05	0	0	0	0	0
P06727	Apolipoprotein A-IV	(K)LGEVNTYAGDLQK(K)	23.75	<0.1%	45398.2	5.28	0.000244795	0.000120427	0.000198365	0	0	0	0.000218082	3.3693e-05	6.79089e-05	0	0	0
P06727	Apolipoprotein A-IV	(K)LGPHAGDVEGHLSFLEK(D)	22.98	<0.1%	45398.2	5.28	0.00033924	0.000447603	0	0	0	0	0	0	4.45027e-05	0	0	0
P06727	Apolipoprotein A-IV	(K)LNHQLEGLTFQMK(K)	22.67	<0.1%	45398.2	5.28	0	0.000140675	0	0	0	0	0	0	5.3896e-05	0	0	0
P06727	Apolipoprotein A-IV	(K)SLAELGGHLDQQVEEFR(R)	29.19	<0.1%	45398.2	5.28	0.000183808	0.000175844	0.000750676	0	0	0	7.17231e-05	6.65066e-05	0.000160148	0	0	0
P06727	Apolipoprotein A-IV	(K)SLAELGGHLDQQVEEFRR(R)	22.58	<0.1%	45398.2	5.28	0.000179573	0.000253642	0.000217813	0	0	0	9.9757e-05	0	0	0	0	0
P06727	Apolipoprotein A-IV	(K)VNSFFSTFK(E)	18.95	<0.1%	45398.2	5.28	3.87521e-05	0.0003389	0.000159665	0	0	0	0	0	5.00463e-05	0	0	0
P06727	Apolipoprotein A-IV	(R)ISASAEELR(Q)	18.36	<0.1%	45398.2	5.28	0.000233783	1.0135e-05	3.6367e-05	0	0	0	9.5024e-05	0	0	0	0	0
P06727	Apolipoprotein A-IV	(R)LAPLAEDVR(G)	20.3	<0.1%	45398.2	5.28	0.00022743	6.71405e-05	6.53438e-05	0	0	0	0.0001733	4.35316e-05	1.3936e-05	0	0	0
P06727	Apolipoprotein A-IV	(R)LLPHANEVSQK(I)	18.21	<0.1%	45398.2	5.28	2.60888e-05	2.86679e-06	6.43715e-06	0	0	0	9.35677e-05	0	8.54636e-05	0	0	0
P06727	Apolipoprotein A-IV	(R)LTPYADEFK(V)	21.07	<0.1%	45398.2	5.28	0.00015882	5.87213e-05	0.000110268	0	0	0	0.000178397	5.39198e-05	5.18941e-05	0	0	0
P06727	Apolipoprotein A-IV	(R)SLAPYAQDTQEK(L)	15.06	<0.1%	45398.2	5.28	5.75987e-06	4.25223e-07	2.56708e-07	0	0	0	3.7864e-06	0	1.36588e-06	0	0	0
P0C0L4	Complement C4-A	(K)VGLSGMAIADVTLLSGFHALR(A)	27.79	<0.1%	194380	6.66	0	0	6.0482e-05	0	0	0	0	0	3.66493e-05	0	0	0
P20851	C4b-binding protein beta chain	(K)EVEGQILGTYVCIK(G)	14.16	0.004	29326.9	5.05	0	1.11901e-06	0	0	0	0	0	0	1.4013e-06	0	0	0
A6NMB1	Sialic acid-binding Ig-like lectin 16	(R)TVLENLR(N)	15.42	<0.1%	53789.6	10.08	0	0	0	0	0	0	0.000122694	0.000170938	0	0	0	0
O00110	Putative transcription factor ovo-like protein 3	(R)CSACGKAFTQRCSLEAHLAK(V)	14.58	0.004	24510.5	11.61	0	0	0	0	0	0	0	1.18722e-05	0	0	0	0
O00468	Agrin	(R)GPSGLLLYNGQK(T)	14.28	0.005	225387	6.01	0	0	0	0	0	0	0	0	1.78627e-05	0	0	0
O00716	Transcription factor E2F3	(R)ALLASPGFAAAAAAAAAPGAYIQILTTNTSTTSCSSSLQSGAVAAGPLLPSAPGAEQTAGSLLYTTPHGPSSR(A)	14.75	0.003	49560.1	5.29	0	0	0	0	0	0	0	0	9.03912e-06	0	0	0
O43866	CD5 antigen-like	(R)EATLQDCPSGPWGK(N)	14.65	<0.1%	39627.6	5.28	0	0	0	0	0	0	3.71358e-05	0	0	0	0	0
O43866	CD5 antigen-like	(R)IWLDNVR(C)	13.43	0.002	39627.6	5.28	0	0	0	0	0	0	3.46601e-05	0	0	0	0	0
O60678	Protein arginine N-methyltransferase 3	(K)TLISEPCGIK(H)	14.33	0.004	60559.7	5.18	0	0	0	0	0	0	0	6.87052e-05	0	0	0	0
P00338	L-lactate dehydrogenase A chain	(K)DQLIYNLLK(E)	13.81	0.002	36973.3	8.77	0	0	0	0	0	0	6.99027e-05	0	0	0	0	0
P00734	Prothrombin	(K)ISMLEK(I)	12.48	0.004	71519	5.64	0	0	0	0	0	0	0.000105218	0	0	0	0	0
P00734	Prothrombin	(K)IYIHPR(Y)	19.66	<0.1%	71519	5.64	0	0	0	0	0	0	0.00013216	0	0.000133508	0	0	0
P00734	Prothrombin	(K)LAACLEGNCAEGLGTNYR(G)	24.59	<0.1%	71519	5.64	0	0	0	0	0	0	0.000130703	0	4.25008e-05	0	0	0
P00734	Prothrombin	(K)LKKPVAFSDYIHPVCLPDR(E)	19.5	<0.1%	71519	5.64	0	0	0	0	0	0	0	0	7.66863e-05	0	0	0
P00734	Prothrombin	(K)YGFYTHVFR(L)	24.21	<0.1%	71519	5.64	0	0	0	0	0	0	0	0	9.47029e-05	0	0	0
P00734	Prothrombin	(R)GDACEGDSGGPFVMK(S)	24.3	<0.1%	71519	5.64	0	0	0	0	0	0	0.000320023	4.40263e-05	2.44842e-05	0	0	0
P00734	Prothrombin	(R)ITDNMFCAGYKPDEGKR(G)	17.9	<0.1%	71519	5.64	0	0	0	0	0	0	0.000268324	0	0	0	0	0
P00734	Prothrombin	(R)IVEGSDAEIGMSPWQVMLFR(K)	23.14	<0.1%	71519	5.64	0	0	0	0	0	0	0	0	2.38682e-05	0	0	0
P00734	Prothrombin	(R)KSPQELLCGASLISDR(W)	22.84	<0.1%	71519	5.64	0	0	0	0	0	0	0	0.000162694	0.000183246	0	0	0
P00734	Prothrombin	(R)LAVTTHGLPCLAWASAQAK(A)	24	<0.1%	71519	5.64	0	0	0	0	0	0	0.000253033	3.89696e-05	9.90146e-05	0	0	0
P00734	Prothrombin	(R)NPDSSTTGPWCYTTDPTVR(R)	24.58	<0.1%	71519	5.64	0	0	0	0	0	0	0	0	0.000143517	0	0	0
P00734	Prothrombin	(R)SGIECQLWR(S)	18.25	<0.1%	71519	5.64	0	0	0	0	0	0	0.000359343	0.000103333	6.96028e-05	0	0	0
P00734	Prothrombin	(R)TFGSGEADCGLRPLFEK(K)	26.93	<0.1%	71519	5.64	0	0	0	0	0	0	0	0.00010773	0.000224823	0	0	0
P00734	Prothrombin	(R)VTGWGNLK(E)	15.41	<0.1%	71519	5.64	0	0	0	0	0	0	0.00016165	0	0	0	0	0
P00734	Prothrombin	(R)WYQMGIVSWGEGCDR(D)	15.35	<0.1%	71519	5.64	0	0	0	0	0	0	0	0	8.65415e-07	0	0	0
P00736	Complement C1r subcomponent	(K)VLNYVDWIK(K)	19.79	<0.1%	81657.6	5.82	0	0	0	0	0	0	0	0	3.01817e-05	0	0	0
P00736	Complement C1r subcomponent	(R)LPVANPQACENWLR(G)	19.75	<0.1%	81657.6	5.82	0	0	0	0	0	0	0	0	3.52634e-05	0	0	0
P01860	Ig gamma-3 chain C region	(R)CPAPELLGGPSVFLFPPKPK(D)	14.12	0.006	42313.2	8.95	0	0	0	0	0	0	0	0	2.60241e-05	0	0	0
P01871	Ig mu chain C region	(K)DVMQGTDEHVVCK(V)	23.46	<0.1%	49990.3	6.35	0	0	0	0	0	0	0.00029381	0	0	0	0	0
P01871	Ig mu chain C region	(K)QVGSGVTTDQVQAEAK(E)	18.53	<0.1%	49990.3	6.35	0	0	0	0	0	0	3.93203e-05	0	0	0	0	0
P01871	Ig mu chain C region	(K)YAATSQVLLPSKDVMQGTDEHVVCK(V)	17.63	<0.1%	49990.3	6.35	0	0	0	0	0	0	7.1359e-06	0	0	0	0	0
P02649	Apolipoprotein E	(K)VQAAVGTSAAPVPSDNH(-)	19.54	<0.1%	36267.6	5.65	0	0	0	0	0	0	0.000178397	0	2.92578e-05	0	0	0
P02649	Apolipoprotein E	(R)AKLEEQAQQIR(L)	17.31	<0.1%	36267.6	5.65	0	0	0	0	0	0	6.6626e-05	0	8.68495e-05	0	0	0
P02649	Apolipoprotein E	(R)FWDYLR(W)	15.77	<0.1%	36267.6	5.65	0	0	0	0	0	0	5.93445e-05	0	2.09424e-05	0	0	0
P02649	Apolipoprotein E	(R)LASHLR(K)	17.38	<0.1%	36267.6	5.65	0	0	0	0	0	0	0	0	3.77272e-05	0	0	0
P02649	Apolipoprotein E	(R)LGADMEDVCGR(L)	18.44	<0.1%	36267.6	5.65	0	0	0	0	0	0	0.00016165	0	0	0	0	0
P02649	Apolipoprotein E	(R)WVQTLSEQVQEELLSSQVTQELR(A)	22.65	<0.1%	36267.6	5.65	0	0	0	0	0	0	0	0	2.92578e-05	0	0	0
P02654	Apolipoprotein C-I	(R)EWFSETFQK(V)	14.57	0.001	9331.8	8.01	0	0	0	0	0	0	0	0	5.83616e-05	0	0	0
P02671	Fibrinogen alpha chain	(K)MADEAGSEADHEGTHSTK(R)	17.29	<0.1%	95713	5.7	0	0	0	0	0	0	0	0	5.57438e-05	0	0	0
P02671	Fibrinogen alpha chain	(K)QFTSSTSYNR(G)	17.64	<0.1%	95713	5.7	0	0	0	0	0	0	7.90046e-05	0	0.000119803	0	0	0
P02671	Fibrinogen alpha chain	(K)VTSGSTTTTR(R)	14.26	0.003	95713	5.7	0	0	0	0	0	0	3.71358e-05	0	3.69572e-05	0	0	0
P02671	Fibrinogen alpha chain	(R)EVDLKDYEDQQKQLEQVIAK(D)	15.21	0.002	95713	5.7	0	0	0	0	0	0	7.35434e-05	0	0	0	0	0
P02671	Fibrinogen alpha chain	(R)GDFSSANNR(D)	16.16	<0.1%	95713	5.7	0	0	0	0	0	0	9.61162e-05	7.09037e-05	7.79182e-05	0	0	0
P02671	Fibrinogen alpha chain	(R)GSESGIFTNTK(E)	18.12	<0.1%	95713	5.7	0	0	0	0	0	0	0.000629852	0.000242941	0	0	0	0
P02671	Fibrinogen alpha chain	(R)HRHPDEAAFFDTASTGK(T)	16.39	<0.1%	95713	5.7	0	0	0	0	0	0	0.00017949	0.000194023	0	0	0	0
P02675	Fibrinogen beta chain	(K)DNENVVNEYSSELEKHQLYIDETVNSNIPTNLR(V)	16.85	<0.1%	56611.8	8.98	0	0	0	0	0	0	0	0	7.46844e-05	0	0	0
P02675	Fibrinogen beta chain	(K)REEAPSLRPAPPPISGGGYR(A)	16.47	<0.1%	56611.8	8.98	0	0	0	0	0	0	0.000206795	0.000109379	4.18849e-05	0	0	0
P02675	Fibrinogen beta chain	(K)YQISVNK(Y)	12.46	0.004	56611.8	8.98	0	0	0	0	0	0	5.82522e-05	0	0	0	0	0
P02675	Fibrinogen beta chain	(R)DNDGWLTSDPR(K)	21.6	<0.1%	56611.8	8.98	0	0	0	0	0	0	0	0	4.21928e-05	0	0	0
P02675	Fibrinogen beta chain	(R)GHRPLDK(K)	14.22	0.005	56611.8	8.98	0	0	0	0	0	0	0.000115048	0	0.000177087	0	0	0
P02679	Fibrinogen gamma chain	(K)ASTPNGYDNGIIWATWK(T)	14.88	0.002	52138.3	5.37	0	0	0	0	0	0	0	0	5.3126e-06	0	0	0
P02679	Fibrinogen gamma chain	(K)DCQDIANK(G)	15.11	<0.1%	52138.3	5.37	0	0	0	0	0	0	0	0	2.07884e-05	0	0	0
P02679	Fibrinogen gamma chain	(K)IIPFNR(L)	14.24	0.007	52138.3	5.37	0	0	0	0	0	0	0.000422329	8.95915e-05	3.01817e-05	0	0	0
P02679	Fibrinogen gamma chain	(K)MLEEIMK(Y)	15.45	<0.1%	52138.3	5.37	0	0	0	0	0	0	0.000407766	0	3.34155e-05	0	0	0
P02679	Fibrinogen gamma chain	(K)RLDGSVDFKK(N)	13.85	0.005	52138.3	5.37	0	0	0	0	0	0	0	0	2.29443e-05	0	0	0
P02679	Fibrinogen gamma chain	(R)FGSYCPTTCGIADFLSTYQTK(V)	28.1	<0.1%	52138.3	5.37	0	0	0	0	0	0	0	0	0.0002664	0	0	0
P02679	Fibrinogen gamma chain	(R)KMLEEIMK(Y)	17.55	<0.1%	52138.3	5.37	0	0	0	0	0	0	0.000444173	0	8.74655e-06	0	0	0
P02679	Fibrinogen gamma chain	(R)LDGSVDFK(K)	16.5	0.003	52138.3	5.37	0	0	0	0	0	0	0.000120145	0	0	0	0	0
P02679	Fibrinogen gamma chain	(R)LDGSVDFKK(N)	21.6	<0.1%	52138.3	5.37	0	0	0	0	0	0	0.000162014	0	0.000116569	0	0	0
P02746	Complement C1q subcomponent subunit B	(K)LEQGENVFLQATDK(N)	21.51	<0.1%	26949.5	9.2	0	0	0	0	0	0	0.000214805	8.84922e-05	0	0	0	0
P02746	Complement C1q subcomponent subunit B	(K)VPGLYYFTYHASSR(G)	20.18	<0.1%	26949.5	9.2	0	0	0	0	0	0	0	0	9.14692e-05	0	0	0
P02746	Complement C1q subcomponent subunit B	(R)FDHVITNMNNNYEPR(S)	18.99	<0.1%	26949.5	9.2	0	0	0	0	0	0	2.60679e-05	0	3.72652e-05	0	0	0
P02747	Complement C1q subcomponent subunit C	(K)VVTFCGHTSK(T)	15.83	<0.1%	26001.4	9	0	0	0	0	0	0	0	0	3.91131e-05	0	0	0
P02747	Complement C1q subcomponent subunit C	(R)QTHQPPAPNSLIR(F)	14.85	<0.1%	26001.4	9	0	0	0	0	0	0	4.55096e-05	0	0	0	0	0
P02751	Fibronectin	(K)DDKESVPISDTIIPAVPPPTDLR(F)	14.7	0.006	266214	5.46	0	0	0	0	0	0	2.89805e-05	0	0	0	0	0
P02751	Fibronectin	(K)VTIMWTPPESAVTGYR(V)	17.01	<0.1%	266214	5.46	0	0	0	0	0	0	0	0	3.04897e-06	0	0	0
P02751	Fibronectin	(R)VDVIPVNLPGEHGQR(L)	18.28	<0.1%	266214	5.46	0	0	0	0	0	0	0	7.31023e-05	0	0	0	0
P02751	Fibronectin	(R)VPGTSTSATLTGLTR(G)	14.97	<0.1%	266214	5.46	0	0	0	0	0	0	6.11648e-05	0	0	0	0	0
P04003	C4b-binding protein alpha chain	(K)CKPPPDIR(N)	15.06	<0.1%	69085.9	7.32	0	0	0	0	0	0	0	0	6.59071e-05	0	0	0
P04003	C4b-binding protein alpha chain	(K)SRPANHCVYFYGDEISFSCHETSR(F)	15.67	<0.1%	69085.9	7.32	0	0	0	0	0	0	0	0	5.17401e-05	0	0	0
P04003	C4b-binding protein alpha chain	(K)WNPSPPACEPNSCINLPDIPHASWETYPRPTK(E)	14.83	0.002	69085.9	7.32	0	0	0	0	0	0	0	0	3.77272e-05	0	0	0
P04003	C4b-binding protein alpha chain	(K)YTCLPGYVR(S)	19.66	<0.1%	69085.9	7.32	0	0	0	0	0	0	0.000206067	2.62728e-05	3.27995e-05	0	0	0
P04003	C4b-binding protein alpha chain	(R)GSSVIHCDADSK(W)	22	<0.1%	69085.9	7.32	0	0	0	0	0	0	4.33251e-05	0	7.62243e-05	0	0	0
P04003	C4b-binding protein alpha chain	(R)GVGWSHPLPQCEIVK(C)	21.97	<0.1%	69085.9	7.32	0	0	0	0	0	0	6.55338e-05	0.000128066	0.000151679	0	0	0
P04004	Vitronectin	(R)GQYCYELDEK(A)	17.99	<0.1%	55103.4	5.55	0	0	0	0	0	0	0.000371358	3.39678e-05	1.13951e-05	0	0	0
P04004	Vitronectin	(R)MDWLVPATCEPIQSVFFFSGDK(Y)	21.91	<0.1%	55103.4	5.55	0	0	0	0	0	0	0	0	1.21805e-05	0	0	0
P04004	Vitronectin	(R)VDTVDPPYPR(S)	17.89	<0.1%	55103.4	5.55	0	0	0	0	0	0	9.5024e-05	0	0	0	0	0
P04114	Apolipoprotein B-100	(R)TLQGIPQMIGEVIR(K)	15.41	<0.1%	516964	6.59	0	0	0	0	0	0	0	0	1.81706e-05	0	0	0
P06727	Apolipoprotein A-IV	(R)ENADSLQASLRPHADELK(A)	16.68	<0.1%	45398.2	5.28	0	0	0	0	0	0	0	7.36519e-05	0	0	0	0
P07225	Vitamin K-dependent protein S	(K)SCEVVSVCLPLNLDTK(Y)	21.78	<0.1%	77175.2	5.48	0	0	0	0	0	0	0	0	3.78812e-05	0	0	0
P07225	Vitamin K-dependent protein S	(K)SQDILLSVENTVIYR(I)	22.01	<0.1%	77175.2	5.48	0	0	0	0	0	0	0	0	4.86604e-05	0	0	0
P07225	Vitamin K-dependent protein S	(K)VYFAGFPR(K)	17.4	<0.1%	77175.2	5.48	0	0	0	0	0	0	4.2961e-05	0	3.21836e-05	0	0	0
P08603	Complement factor H	(K)IVSSAMEPDREYHFGQAVR(F)	15.53	0.002	143772	6.22	0	0	0	0	0	0	3.49513e-05	0	0	0	0	0
P08603	Complement factor H	(K)LGYVTADGETSGSITCGK(D)	21.45	<0.1%	143772	6.22	0	0	0	0	0	0	6.73541e-06	0	0	0	0	0
P08603	Complement factor H	(K)SIDVACHPGYALPK(A)	15.48	<0.1%	143772	6.22	0	0	0	0	0	0	4.33251e-05	0	0	0	0	0
P08603	Complement factor H	(K)WSSPPQCEGLPCK(S)	17.84	<0.1%	143772	6.22	0	0	0	0	0	0	4.55096e-05	0	0	0	0	0
P08603	Complement factor H	(R)NTEILTGSWSDQTYPEGTQAIYK(C)	14.6	0.001	143772	6.22	0	0	0	0	0	0	0	0	1.66308e-05	0	0	0
P08603	Complement factor H	(R)SITCIHGVWTQLPQCVAIDK(L)	15.33	<0.1%	143772	6.22	0	0	0	0	0	0	0	0	7.25286e-05	0	0	0
P08603	Complement factor H	(R)SLGNVIMVCR(K)	15.07	0.002	143772	6.22	0	0	0	0	0	0	0	0	2.83339e-05	0	0	0
P09871	Complement C1s subcomponent	(K)EDTPNSVWEPAK(A)	17.33	<0.1%	78223.5	4.86	0	0	0	0	0	0	9.28395e-05	0	0	0	0	0
P09871	Complement C1s subcomponent	(K)LLEVPEGR(T)	16.12	<0.1%	78223.5	4.86	0	0	0	0	0	0	0.000105946	0	0	0	0	0
P09871	Complement C1s subcomponent	(K)NYVDWIMK(T)	14.98	0.001	78223.5	4.86	0	0	0	0	0	0	0	0	4.57346e-05	0	0	0
P09871	Complement C1s subcomponent	(K)SNALDIIFQTDLTGQK(K)	19.21	<0.1%	78223.5	4.86	0	0	0	0	0	0	0	0	8.25378e-05	0	0	0
P09871	Complement C1s subcomponent	(R)DVVQITCLDGFEVVEGR(V)	27.75	<0.1%	78223.5	4.86	0	0	0	0	0	0	0	0	8.14599e-05	0	0	0
P09871	Complement C1s subcomponent	(R)LPVAPLRK(C)	13.7	0.006	78223.5	4.86	0	0	0	0	0	0	0	0	2.54081e-05	0	0	0
P09871	Complement C1s subcomponent	(R)SSNNPHSPIVEEFQVPYNK(L)	14.02	0.006	78223.5	4.86	0	0	0	0	0	0	0	0	3.61873e-05	0	0	0
P09871	Complement C1s subcomponent	(R)TNFDNDIALVR(L)	20.99	<0.1%	78223.5	4.86	0	0	0	0	0	0	0.000118689	5.8262e-05	9.88606e-05	0	0	0
P0C0L4	Complement C4-A	(K)EGAIHREELVYELNPLDHR(G)	15.47	<0.1%	194380	6.66	0	0	0	0	0	0	6.48056e-05	0	0.000107022	0	0	0
P0C0L4	Complement C4-A	(K)FACYYPR(V)	16.5	<0.1%	194380	6.66	0	0	0	0	0	0	8.48298e-05	0	0	0	0	0
P0C0L4	Complement C4-A	(K)ITPGKPYILTVPGHLDEMQLDIQAR(Y)	18.04	<0.1%	194380	6.66	0	0	0	0	0	0	0	0	4.25008e-05	0	0	0
P0C0L4	Complement C4-A	(K)ITQVLHFTK(D)	20.51	<0.1%	194380	6.66	0	0	0	0	0	0	0.000170752	0	2.664e-05	0	0	0
P0C0L4	Complement C4-A	(K)LHLETDSLALVALGALDTALYAAGSK(S)	17.16	<0.1%	194380	6.66	0	0	0	0	0	0	0	0	7.05267e-05	0	0	0
P0C0L4	Complement C4-A	(K)SCGLHQLLR(G)	18.16	<0.1%	194380	6.66	0	0	0	0	0	0	0.000455096	0	0	0	0	0
P0C0L4	Complement C4-A	(K)SHALQLNNR(Q)	14.69	0.001	194380	6.66	0	0	0	0	0	0	0	0	3.15676e-05	0	0	0
P0C0L4	Complement C4-A	(R)AACAQLNDFLQEYGTQGCQV(-)	23.75	<0.1%	194380	6.66	0	0	0	0	0	0	0	0	0.000148907	0	0	0
P0C0L4	Complement C4-A	(R)CSVFYGAPSK(S)	13.92	0.009	194380	6.66	0	0	0	0	0	0	4.91503e-05	0	0	0	0	0
P0C0L4	Complement C4-A	(R)DSSTWLTAFVLK(V)	21.16	<0.1%	194380	6.66	0	0	0	0	0	0	0	0	6.55991e-05	0	0	0
P0C0L4	Complement C4-A	(R)EELVYELNPLDHR(G)	23.43	<0.1%	194380	6.66	0	0	0	0	0	0	8.70143e-05	0.000155548	0.000244842	0	0	0
P0C0L4	Complement C4-A	(R)EFHLHLR(L)	14.01	0.002	194380	6.66	0	0	0	0	0	0	7.49998e-05	0	0	0	0	0
P0C0L4	Complement C4-A	(R)GHLFLQTDQPIYNPGQR(V)	20.37	<0.1%	194380	6.66	0	0	0	0	0	0	0	9.67369e-05	0	0	0	0
P0C0L4	Complement C4-A	(R)LLLFSPSVVHLGVPLSVGVQLQDVPR(G)	15.69	<0.1%	194380	6.66	0	0	0	0	0	0	0	0	1.47829e-05	0	0	0
P0C0L4	Complement C4-A	(R)RGHLFLQTDQPIYNPGQR(V)	16	<0.1%	194380	6.66	0	0	0	0	0	0	6.77182e-05	0	0	0	0	0
P0C0L4	Complement C4-A	(R)TYNVLDMK(N)	17.81	<0.1%	194380	6.66	0	0	0	0	0	0	7.86405e-05	3.39129e-05	0	0	0	0
P0C0L4	Complement C4-A	(R)VEYGFQVK(V)	17.18	<0.1%	194380	6.66	0	0	0	0	0	0	0.000106674	0	1.75547e-05	0	0	0
P0C0L4	Complement C4-A	(R)VHYTVCIWR(N)	18.93	<0.1%	194380	6.66	0	0	0	0	0	0	0	0	8.70035e-05	0	0	0
P0C0L4	Complement C4-A	(R)YVSHFETEGPHVLLYFDSVPTSR(E)	17.92	<0.1%	194380	6.66	0	0	0	0	0	0	0	0	8.46937e-06	0	0	0
P0C0L5	Complement C4-B	(K)LQETSNWLLSQQQADGSFQDLSPVIHR(S)	18.33	<0.1%	194288	6.91	0	0	0	0	0	0	0	0	5.02002e-05	0	0	0
P10720	Platelet factor 4 variant	(R)HITSLEVIK(A)	13.32	0.002	11780.7	9.98	0	0	0	0	0	0	0.000136165	0	0	0	0	0
P10909	Clusterin	(K)TLLSNLEEAK(K)	17.43	<0.1%	53064.2	5.89	0	0	0	0	0	0	0.000161286	9.45383e-05	9.88606e-05	0	0	0
P10909	Clusterin	(K)TLLSNLEEAKK(K)	12.42	0.004	53064.2	5.89	0	0	0	0	0	0	0.000178762	0	0.000187866	0	0	0
P10909	Clusterin	(R)EILSVDCSTNNPSQAK(L)	20.25	<0.1%	53064.2	5.89	0	0	0	0	0	0	0.000266504	3.28136e-05	1.51987e-05	0	0	0
P10909	Clusterin	(R)ELDESLQVAER(L)	18.82	<0.1%	53064.2	5.89	0	0	0	0	0	0	0	0	6.02095e-05	0	0	0
P10909	Clusterin	(R)IDSLLENDR(Q)	16.17	<0.1%	53064.2	5.89	0	0	0	0	0	0	0.000227184	0	1.44903e-05	0	0	0
P10909	Clusterin	(R)KYNELLK(S)	13.9	0.006	53064.2	5.89	0	0	0	0	0	0	0	0	8.26918e-05	0	0	0
P10909	Clusterin	(R)VTTVASHTSDSDVPSGVTEVVVK(L)	23.38	<0.1%	53064.2	5.89	0	0	0	0	0	0	0.000144902	0.000145105	0.000130274	0	0	0
P18428	Lipopolysaccharide-binding protein	(K)GLQYAAQEGLLALQSELLR(I)	14.52	0.003	53553.8	6.23	0	0	0	0	0	0	0	0	1.06098e-05	0	0	0
P18428	Lipopolysaccharide-binding protein	(R)ITLPDFTGDLR(I)	22.52	<0.1%	53553.8	6.23	0	0	0	0	0	0	0	0	6.26733e-06	0	0	0
P18428	Lipopolysaccharide-binding protein	(R)SPVTLLAAVMSLPEEHNK(M)	19.83	<0.1%	53553.8	6.23	0	0	0	0	0	0	0	0	3.51094e-05	0	0	0
P19838	Nuclear factor NF-kappa-B p105 subunit	(K)AALLLDHPNGDGLNAIHLAmmSNSLPCLLLLVAAGADVNAQEQKSGR(T)	16.28	<0.1%	105982	5.2	0	0	0	0	0	0	9.24754e-06	0	0	0	0	0
P20851	C4b-binding protein beta chain	(K)NLCEAMENFMQQLK(E)	23.43	<0.1%	29326.9	5.05	0	0	0	0	0	0	0	0	3.55713e-05	0	0	0
P22352	Glutathione peroxidase 3	(K)FLVGPDGIPIMR(W)	24.48	<0.1%	25630	8.63	0	0	0	0	0	0	2.47572e-05	0	5.95935e-05	0	0	0
P23142	Fibulin-1	(K)TGYYFDGISR(M)	14.88	0.002	81320.7	5.07	0	0	0	0	0	0	0	0	7.39145e-06	0	0	0
P27169	Serum paraoxonase/arylesterase 1	(K)FDVSSFNPHGISTFTDEDNAMYLLVVNHPDAK(S)	28.31	<0.1%	39901.7	5.08	0	0	0	0	0	0	0	0	1.53988e-05	0	0	0
P27169	Serum paraoxonase/arylesterase 1	(K)IFFYDSENPPASEVLR(I)	22.82	<0.1%	39901.7	5.08	0	0	0	0	0	0	8.48298e-05	0	0.000324916	0	0	0
P27169	Serum paraoxonase/arylesterase 1	(K)ILLMDLNEEDPTVLELGITGSK(F)	26.75	<0.1%	39901.7	5.08	0	0	0	0	0	0	0	0	3.27995e-05	0	0	0
P27169	Serum paraoxonase/arylesterase 1	(R)IQNILTEEPK(V)	18.4	<0.1%	39901.7	5.08	0	0	0	0	0	0	0.000279611	4.32568e-05	6.32893e-05	0	0	0
P27169	Serum paraoxonase/arylesterase 1	(R)VVAEGFDFANGINISPDGK(Y)	25.66	<0.1%	39901.7	5.08	0	0	0	0	0	0	0	0	7.29905e-05	0	0	0
P53367	Arfaptin-1	(K)KYENILK(L)	15.55	0.002	41794.6	6.24	0	0	0	0	0	0	0.000113592	0	0	0	0	0
P57087	Junctional adhesion molecule B	(K)YRCEVSAPSEQGQNLEEDTVTLEVLVAPAVPSCEVPSSALSGTVVELRCQDK(E)	13.54	0.007	33662.7	9.61	0	0	0	0	0	0	0	0	1.60148e-05	0	0	0
P61626	Lysozyme C	(R)STDYGIFQINSR(Y)	16.88	<0.1%	16993.2	10.26	0	0	0	0	0	0	7.64561e-05	0	0	0	0	0
P80108	Phosphatidylinositol-glycan-specific phospholipase D	(R)TLLLVGSPTWK(N)	16.58	<0.1%	92962.3	5.91	0	0	0	0	0	0	0	0	2.97198e-05	0	0	0
Q12933	TNF receptor-associated factor 2	(K)TATFENIVCVLNR(E)	13.6	0.007	57627.1	8.44	0	0	0	0	0	0	0	0	1.63228e-05	0	0	0
Q13433	Zinc transporter ZIP6	(R)GPLFSHLSSQNIEESAYFDSTWKGLTALGGLYFmFLVEHVLTLIKQFK(D)	14.17	0.003	85501.7	6.45	0	0	0	0	0	0	0	0	9.08532e-06	0	0	0
Q14624	Inter-alpha-trypsin inhibitor heavy chain H4	(R)DQFNLIVFSTEATQWRPSLVPASAENVNK(A)	14.66	0.001	103584	6.52	0	0	0	0	0	0	0	0	8.36158e-06	0	0	0
Q14624	Inter-alpha-trypsin inhibitor heavy chain H4	(R)QLGLPGPPDVPDHAAYHPFR(R)	22.26	<0.1%	103584	6.52	0	0	0	0	0	0	0	0	3.07977e-05	0	0	0
Q15485	Ficolin-2	(R)VDLVDFEDNYQFAK(Y)	21.95	<0.1%	34457	6.32	0	0	0	0	0	0	0	0	9.3779e-05	0	0	0
Q86T82	Ubiquitin carboxyl-terminal hydrolase 37	(K)IGQQVIIPRYLTLSSHCTENTKPPFTLGWSAHmAISRPLKASQMVNSCITSPSTPSK(K)	13.27	0.008	111081	5.87	0	0	0	0	0	0	0	0	1.53988e-05	0	0	0
Q86WR0	Coiled-coil domain-containing protein 25	(K)LSSAHVYLR(L)	17.06	<0.1%	24649.6	6.34	0	0	0	0	0	0	0	4.57851e-05	0	0	0	0
Q86Y34	Adhesion G protein-coupled receptor G3	(K)DEDKPPDRVR(L)	12.6	0.003	61715.5	9.62	0	0	0	0	0	0	0.000444173	0	0	0	0	0
Q8IY63	Angiomotin-like protein 1	(R)TDVAVLRYQPPPEYGVTSRPCQLPFPSTmQQHSPMSSQTSSASGPLHSVSLPLPLPMALGAPQPPPAASPSQQLGPDAFAIVER(A)	13.76	0.005	106915	6.63	0	0	0	0	0	0	0	0	1.3628e-05	0	0	0
Q8NBJ9	SID1 transmembrane family member 2	(K)NESEIQFFYVDVSTLSPVNTTYQLRVSRMDDFVLR(T)	14.62	0.008	95650.8	6.56	0	0	0	0	0	0	5.49755e-05	0	0	0	0	0
Q8TD20	Solute carrier family 2, facilitated glucose transporter member 12	(R)ImIGLTLVFFVQITGQPNILFYASTVLKSVGFQSNEAASLASTGVGVVKVISTIPATLLVDHVGSK(T)	14.01	0.007	67592.8	9.19	0	0	0	0	0	0	0	2.81416e-05	0	0	0	0
Q96JM2	Zinc finger protein 462	(K)SAPSPTSNSTYLTmNAASREIPNTTVSNFRGSmGNSIMRPNSSASK(F)	12.75	0.003	289646	7.84	0	0	0	0	0	0	1.36165e-05	0	0	0	0	0
Q99437	V-type proton ATPase 21 kDa proteolipid subunit	(R)NYHAGYSmFGAGLTVGLSNLFCGVCVGIVGSGAALADAQNPSLFVKILIVEIFGSAIGLFGVIVAILQTSR(V)	15.11	0.002	21691.2	7.99	0	0	0	0	0	0	3.28397e-05	0	0	0	0	0
Q9BVS4	Serine/threonine-protein kinase RIO2	(R)LSAmKEFAYmK(A)	14.13	0.009	63738.3	5.66	0	0	0	0	0	0	3.7864e-06	0	0	0	0	0
Q9H094	Neuroblastoma breakpoint family member 3	(K)AEMNILEINKK(S)	14.82	0.001	73748.4	4.4	0	0	0	0	0	0	0	0	1.81706e-05	0	0	0
Q9H7S9	Zinc finger protein 703	(R)YHPYGKSHLSTAGGLAVPSLPTAGPYYSPYALYGQRLASASALGYQ(-)	15.16	0.002	58791.3	9.39	0	0	0	0	0	0	0	0	1.40745e-05	0	0	0
Q9H9Y4	GPN-loop GTPase 2	(K)FISVLCTSLATmLHVELPHINLLSKMDLIEHYGK(L)	13.6	0.008	35016.5	5.07	0	0	0	0	0	0	0	0	2.92578e-05	0	0	0
Q9NSB2	Keratin, type II cuticular Hb4	(R)FRANSVSCWSGPGFRGLGSFGSR(S)	14.67	0.004	65982.3	8.42	0	0	0	0	0	0	0	7.03541e-05	0	0	0	0
Q9NYY8	FAST kinase domain-containing protein 2	(R)VTQERINECDEICLSVLSTVLEAMEPCKNVHVLR(T)	16.37	<0.1%	82431.4	8.82	0	0	0	0	0	0	0	0	2.32523e-06	0	0	0
Q9NZI5	Grainyhead-like protein 1 homolog	(R)SVImVVFAEDK(S)	13.31	0.002	70397.2	6.26	0	0	0	0	0	0	0.000143446	0	0	0	0	0
Q9P0X4	Voltage-dependent T-type calcium channel subunit alpha-1I	(K)EAQEDAEmDAELELEMAHGLGPGPRLPTGSPGAPGRGPGGAGGGGDTEGGLCR(R)	13.64	0.008	248465	6.09	0	0	0	0	0	0	0	0	4.88144e-06	0	0	0
Q9P212	1-phosphatidylinositol 4,5-bisphosphate phosphodiesterase epsilon-1	(K)LTQHTACQLLRTYPAATRIDSSNPNPLMFWLHGIQLVALNYQTDDLPLHLNAAmFEANGGCGYVLKPPVLWDK(N)	14.73	0.004	261905	6.07	0	0	0	0	0	0	2.74514e-05	0	0	0	0	0
Q9UKU0	Long-chain-fatty-acid--CoA ligase 6	(R)VIQSVVYCHGGRVGFFQGDIRLLSDDmK(A)	12.51	0.003	78777.5	7.3	0	0	0	0	0	0	6.11648e-06	0	0	0	0	0
Q9Y2L6	FERM domain-containing protein 4B	(R)TQLTIGLSDYETPAHSSYTSCYGNVYNPLPSPSRQYTEISQLDGTDGNQLEDNLESSEQRLFWHEDSKPGTLV(-)	14.17	0.007	118900	9.07	0	0	0	0	0	0	0	3.08898e-05	0	0	0	0
P01593	Ig kappa chain V-I region AG	(K)ILIYDASNLETGVPSR(F)	23.06	<0.1%	12106.2	5.67	0	7.69451e-06	0	0	3.93592e-05	0	0	0	0	0	0	0
P01834	Ig kappa chain C region	(K)VYACEVTHQGLSSPVTK(S)	25.35	<0.1%	11779.8	5.58	0	1.86501e-05	3.57835e-05	0	7.00594e-05	9.3103e-05	0	0	0	0	0	0
P01857	Ig gamma-1 chain C region	(K)TTPPVLDSDGSFFLYSK(L)	25.42	<0.1%	36618.7	8.92	0	0	6.06764e-05	6.22321e-05	0.000273546	0.000161579	0	0	0	0	0	0
P02763	Alpha-1-acid glycoprotein 1	(K)TYmLAFDVNDEKNWGLSVYADKPETTK(E)	22.85	<0.1%	23739.3	4.93	0	5.66964e-05	0.0001056	0	2.73546e-05	1.44159e-05	0	0	0	0	0	0
P02768	Serum albumin	(K)DDNPNLPR(L)	17.4	<0.1%	71362.3	5.92	0.000106304	0	4.88134e-05	0.000714316	0.000120439	3.27362e-05	0	0	0	0	0	0
P02768	Serum albumin	(K)LDELRDEGK(A)	19.69	<0.1%	71362.3	5.92	0.000105457	6.08527e-06	2.68376e-05	0.000871249	0.000728145	0.000182001	0	0	0	0	0	0
P02768	Serum albumin	(K)LVTDLTK(V)	16.76	<0.1%	71362.3	5.92	9.35979e-05	0	6.80665e-05	0.000979479	0	2.6189e-05	0	0	0	0	0	0
P02768	Serum albumin	(K)SLHTLFGDKLCTVATLR(E)	14.93	0.009	71362.3	5.92	0	0.000207816	3.05327e-05	0	0.00017692	0	0	0	0	0	0	0
P02768	Serum albumin	(K)VPQVSTPTLVEVSR(N)	23.45	<0.1%	71362.3	5.92	0	0	4.86189e-05	0.000233235	0.00050183	0.00010812	0	0	0	0	0	0
P02768	Serum albumin	(R)ETYGEMADCCAK(Q)	21.79	<0.1%	71362.3	5.92	0.000100798	0	3.05327e-05	0.000573617	1.22014e-05	7.20797e-06	0	0	0	0	0	0
P02768	Serum albumin	(R)RHPDYSVVLLLR(L)	19.2	<0.1%	71362.3	5.92	3.72698e-05	0	5.03692e-05	0.000152063	0.00139135	0.000156773	0	0	0	0	0	0
O15085	Rho guanine nucleotide exchange factor 11	(K)VVPALPESGQSEPGPPEVEGGTKATGNCFYVSMPSGPPDSSTDHSEAPMSPPQPDSLPAGQTEPQPQLQGGNDDPR(R)	15.9	0.007	168557	5.33	0	0	0	0	0	6.54724e-06	0	0	0	0	0	0
O95425	Supervillin	(R)LPFEEKVEVENVMK(R)	15.64	0.008	249568	6.56	0	0	0	0	2.16476e-05	0	0	0	0	0	0	0
P01009	Alpha-1-antitrypsin	(K)SPLFMGK(V)	15.77	<0.1%	46906.8	5.37	0	0	0	6.71024e-05	0	5.89252e-06	0	0	0	0	0	0
P01042	Kininogen-1	(R)IASFSQNCDIYPGK(D)	15.24	0.003	73040.1	6.34	0	0	0	0	0	8.2291e-06	0	0	0	0	0	0
P01593	Ig kappa chain V-I region AG	(-)DIQMTQSPSSLSASVGDR(V)	23.26	<0.1%	12106.2	5.67	0	0	0	0	8.02928e-05	2.8051e-05	0	0	0	0	0	0
P01596	Ig kappa chain V-I region CAR	(-)DIQMTQSPSTLSASVGDR(V)	20.2	<0.1%	11819	9.01	0	0	0	0	3.71944e-06	9.4905e-06	0	0	0	0	0	0
P01617	Ig kappa chain V-II region TEW	(-)DIVMTQSPLSLPVTPGEPASISCR(S)	18.78	<0.1%	12430.8	4.97	0	0	0	0	4.68375e-05	0	0	0	0	0	0	0
P01620	Ig kappa chain V-III region SIE	(-)EIVLTQSPGTLSLSPGER(A)	22.8	<0.1%	11889	9.11	0	0	0	0	7.39953e-05	6.30698e-05	0	0	0	0	0	0
P01620	Ig kappa chain V-III region SIE	(R)FSGSGSGTDFTLTISR(L)	28.75	<0.1%	11889	9.11	0	0	0	0	0.000137364	2.86517e-05	0	0	0	0	0	0
P01764	Ig heavy chain V-III region 23	(K)NTLYLQMNSLR(A)	19.21	<0.1%	12753.2	9	0	0	0	0	4.54599e-05	1.27942e-05	0	0	0	0	0	0
P01781	Ig heavy chain V-III region GAL	(K)GLEWVANIK(Z)	17.22	<0.1%	12848	4.5	0	0	0	0	9.38717e-05	2.54682e-05	0	0	0	0	0	0
P01834	Ig kappa chain C region	(K)VDNALQSGNSQESVTEQDSKDSTYSLSSTLTLSK(A)	18.16	<0.1%	11779.8	5.58	0	0	0	0	0.000216476	2.51678e-05	0	0	0	0	0	0
P01857	Ig gamma-1 chain C region	(R)EPQVYTLPPSRDELTK(N)	19.37	<0.1%	36618.7	8.92	0	0	0	0.000432919	4.88054e-05	0	0	0	0	0	0	0
P01857	Ig gamma-1 chain C region	(R)VVSVLTVLHQDWLNGKEYK(C)	22.5	<0.1%	36618.7	8.92	0	0	0	0	0	2.70299e-06	0	0	0	0	0	0
P01859	Ig gamma-2 chain C region	(K)CCVECPPCPAPPVAGPSVFLFPPKPK(D)	18.83	<0.1%	36527.6	8.02	0	0	0	0	0	7.74857e-06	0	0	0	0	0	0
P01859	Ig gamma-2 chain C region	(K)GLPAPIEK(T)	16.96	<0.1%	36527.6	8.02	0	0	0	0.000250011	0	2.31856e-05	0	0	0	0	0	0
P01860	Ig gamma-3 chain C region	(K)SCDTPPPCPR(C)	13.58	0.008	42313.2	8.95	0	0	0	8.82072e-05	0	0	0	0	0	0	0	0
P01861	Ig gamma-4 chain C region	(K)TTPPVLDSDGSFFLYSR(L)	26.16	<0.1%	36453.4	7.26	0	0	0	0	4.19176e-05	1.91011e-05	0	0	0	0	0	0
P01871	Ig mu chain C region	(K)YAATSQVLLPSK(D)	18.87	<0.1%	49990.3	6.35	0	0	0	8.71249e-05	0	0	0	0	0	0	0	0
P01876	Ig alpha-1 chain C region	(K)KGDTFSCMVGHEALPLAFTQK(T)	16.1	0.007	38509.8	6.08	0	0	0	0	0	3.42379e-05	0	0	0	0	0	0
P01876	Ig alpha-1 chain C region	(K)SAVQGPPER(D)	16.32	<0.1%	38509.8	6.08	0	0	0	0	0.000108631	9.97103e-06	0	0	0	0	0	0
P01876	Ig alpha-1 chain C region	(K)TFTCTAAYPESK(T)	16.4	<0.1%	38509.8	6.08	0	0	0	5.02186e-06	0	0	0	0	0	0	0	0
P01876	Ig alpha-1 chain C region	(K)YLTWASR(Q)	15.67	0.003	38509.8	6.08	0	0	0	0	0	1.22536e-05	0	0	0	0	0	0
P01876	Ig alpha-1 chain C region	(R)NFPPSQDASGDLYTTSSQLTLPATQCLAGK(S)	16.39	0.002	38509.8	6.08	0	0	0	0	2.36155e-05	2.5288e-05	0	0	0	0	0	0
P01877	Ig alpha-2 chain C region	(R)DASGATFTWTPSSGK(S)	19.33	<0.1%	37324.4	5.72	0	0	0	0	0	7.20797e-06	0	0	0	0	0	0
P02768	Serum albumin	(K)AACLLPK(L)	19.53	<0.1%	71362.3	5.92	0	0	0	0.000606086	0	4.91944e-05	0	0	0	0	0	0
P02768	Serum albumin	(K)AEFAEVSK(L)	19.65	<0.1%	71362.3	5.92	0	0	0	0.000871249	4.60503e-05	1.10522e-05	0	0	0	0	0	0
P02768	Serum albumin	(K)CCAAADPHECYAK(V)	22.2	<0.1%	71362.3	5.92	0	0	0	0	0.000144448	2.06629e-05	0	0	0	0	0	0
P02768	Serum albumin	(K)CCTESLVNR(R)	18.05	<0.1%	71362.3	5.92	0	0	0	0.000406403	9.9382e-05	3.15949e-05	0	0	0	0	0	0
P02768	Serum albumin	(K)DLGEENFK(A)	15.41	0.003	71362.3	5.92	0	0	0	0.000103359	0	1.66985e-05	0	0	0	0	0	0
P02768	Serum albumin	(K)DVFLGMFLYEYAR(R)	15.68	0.004	71362.3	5.92	0	0	0	0	1.04695e-06	0	0	0	0	0	0	0
P02768	Serum albumin	(K)ECCEKPLLEK(S)	21.11	<0.1%	71362.3	5.92	0	0	0	0	0.000121226	0.000102714	0	0	0	0	0	0
P02768	Serum albumin	(K)KLVAASQAALGL(-)	15.86	0.006	71362.3	5.92	0	0	0	0	8.14736e-05	3.32167e-05	0	0	0	0	0	0
P02768	Serum albumin	(K)KQTALVELVK(H)	18.48	<0.1%	71362.3	5.92	0	0	0	0.000352829	0.000373912	0.000118331	0	0	0	0	0	0
P02768	Serum albumin	(K)KYLYEIAR(R)	17.63	<0.1%	71362.3	5.92	0	0	0	0	0	2.37262e-05	0	0	0	0	0	0
P02768	Serum albumin	(K)LKECCEKPLLEK(S)	21.22	<0.1%	71362.3	5.92	0	0	0	0.000963244	0.000154485	0.000101512	0	0	0	0	0	0
P02768	Serum albumin	(K)QEPERNECFLQHKDDNPNLPR(L)	16.85	<0.1%	71362.3	5.92	0	0	0	0.000277609	0	0	0	0	0	0	0	0
P02768	Serum albumin	(K)SEVAHR(F)	15.69	0.006	71362.3	5.92	0	0	0	0	0.00010194	3.49587e-05	0	0	0	0	0	0
P02768	Serum albumin	(K)SHCIAEVENDEMPADLPSLAADFVESKDVCK(N)	14.23	0.006	71362.3	5.92	0	0	0	0	0	4.72122e-06	0	0	0	0	0	0
P02768	Serum albumin	(K)TYETTLEK(C)	16.03	<0.1%	71362.3	5.92	0	0	0	0.000703493	0	1.67585e-05	0	0	0	0	0	0
P02768	Serum albumin	(K)VHTECCHGDLLECADDR(A)	24.56	<0.1%	71362.3	5.92	0	0	0	0.000267868	6.23843e-05	8.7697e-05	0	0	0	0	0	0
P02768	Serum albumin	(R)FKDLGEENFK(A)	20.9	<0.1%	71362.3	5.92	0	0	0	0.000719727	0.000525445	0.000132747	0	0	0	0	0	0
P02768	Serum albumin	(R)HPDYSVVLLLR(L)	19.71	<0.1%	71362.3	5.92	0	0	0	0	0.000539221	4.18663e-05	0	0	0	0	0	0
P04264	Keratin, type II cytoskeletal 1	(K)WELLQQVDTSTR(T)	19.02	<0.1%	66208.7	8.32	0	0	0	0	2.18444e-05	0	0	0	0	0	0	0
P0CG05	Ig lambda-2 chain C regions	(K)AGVETTTPSK(Q)	21.2	<0.1%	11464.5	6.94	0	0	0	7.57608e-05	8.30479e-05	3.30365e-05	0	0	0	0	0	0
Q01970	1-phosphatidylinositol 4,5-bisphosphate phosphodiesterase beta-3	(K)MAEYCRSIFGDALLIEPLDKYPLAPGVPLPSPQDLmGR(I)	13.31	0.004	139595	5.68	0	0	0	9.8489e-05	0	0	0	0	0	0	0	0
Q13635	Protein patched homolog 1	(R)LPTPSPEPPPSVVRFAmPPGHTHSGSDSSDSEYSSQTTVSGLSEELR(H)	13.73	0.004	162082	6.42	0	0	0	0.000100112	0	0	0	0	0	0	0	0
Q13698	Voltage-dependent L-type calcium channel subunit alpha-1S	(R)SNFDNFPQALISVFQVLTGEDWTSmMYNGImAYGGPSYPGMLVCIYFIILFVCGNYILLNVFLAIAVDNLAEAESLTSAQKAKAEEK(K)	14.91	0.007	214686	6.17	0	0	0	0	8.06864e-06	0	0	0	0	0	0	0
Q8NI35	InaD-like protein	(K)IVELVK(D)	13.97	0.008	197163	4.84	0	0	0	0	0	6.12678e-06	0	0	0	0	0	0
Q99965	Disintegrin and metalloproteinase domain-containing protein 2	(R)YIENIYHSKPmRWPFFLFIPFFIIFCVLIAIMVKVNFQR(K)	15.33	<0.1%	84909	5.78	0	0	0	0.000142322	0	0	0	0	0	0	0	0
A8MT65	Zinc finger protein 891	(K)EYTYSKHGMHFTHNMFPVPNNLHmAQNACECNK(D)	15.85	0.006	65073.9	9.56	0	3.35702e-05	0	0	0	0	0	0	0	0	0	0
O00602	Ficolin-1	(K)FQGAWWYADCHASNLNGLYLmGPHESYANGINWSAAKGYK(Y)	13.45	0.009	35534.2	6.4	0	2.90942e-05	0	0	0	0	0	0	0	0	0	0
O15054	Lysine-specific demethylase 6B	(R)GVEPNPGIPGADHYQTPALEVSHHGR(L)	15.56	<0.1%	178284	9.33	1.76608e-05	0	0	0	0	0	0	0	0	0	0	0
O75132	Zinc finger BED domain-containing protein 4	(K)TEVSETARPSSPDTRVPRGTELSGASSFDDTNEK(F)	16.98	0.003	132031	6.38	0	5.50978e-06	0	0	0	0	0	0	0	0	0	0
O95613	Pericentrin	(R)AAGSDADHLR(E)	14.95	<0.1%	380826	5.4	0	0	1.41384e-05	0	0	0	0	0	0	0	0	0
P00390	Glutathione reductase, mitochondrial	(R)AmACRQEPQPQGPPPAAGAVASYDYLVIGGGSGGLASARR(A)	15.77	0.006	56826.6	9.16	0	3.30374e-06	0	0	0	0	0	0	0	0	0	0
P00738	Haptoglobin	(K)LPECEADDGCPKPPEIAHGYVEHSVR(Y)	16.91	0.003	45889.1	6.13	0	4.15632e-05	4.93968e-05	0	0	0	0	0	0	0	0	0
P00739	Haptoglobin-related protein	(R)TEGDGVYTLNDK(K)	22.72	<0.1%	39542.3	6.64	0.000107998	0	0	0	0	0	0	0	0	0	0	0
P01009	Alpha-1-antitrypsin	(K)ELDRDTVFALVNYIFFK(G)	14.43	0.004	46906.8	5.37	0	1.17229e-05	0	0	0	0	0	0	0	0	0	0
P01591	Immunoglobulin J chain	(K)CYTAVVPLVYGGETK(M)	20.31	<0.1%	18554.7	5.12	2.61735e-05	0.000224867	4.45349e-05	0	0	0	0	0	0	0	0	0
P01591	Immunoglobulin J chain	(K)MVETALTPDACYPD(-)	20.7	<0.1%	18554.7	5.12	0.000186349	6.65011e-05	4.66742e-05	0	0	0	0	0	0	0	0	0
P01591	Immunoglobulin J chain	(R)FVYHLSDLCK(K)	20.45	<0.1%	18554.7	5.12	0.000305358	4.96626e-06	0	0	0	0	0	0	0	0	0	0
P01591	Immunoglobulin J chain	(R)IIVPLNNR(E)	20.9	<0.1%	18554.7	5.12	0.000131291	2.54708e-05	1.75028e-05	0	0	0	0	0	0	0	0	0
P01591	Immunoglobulin J chain	(R)SSEDPNEDIVER(N)	26.25	<0.1%	18554.7	5.12	0.000202866	0	0	0	0	0	0	0	0	0	0	0
P02647	Apolipoprotein A-I	(K)DLATVYVDVLKDSGR(D)	23.94	<0.1%	30777.3	5.56	0	4.22026e-05	0	0	0	0	0	0	0	0	0	0
P02647	Apolipoprotein A-I	(K)ETEGLRQEMSK(D)	19.14	<0.1%	30777.3	5.56	0.000516695	0	0	0	0	0	0	0	0	0	0	0
P02647	Apolipoprotein A-I	(K)VEPLRAELQEGAR(Q)	17.22	<0.1%	30777.3	5.56	0	8.25935e-06	0	0	0	0	0	0	0	0	0	0
P02647	Apolipoprotein A-I	(R)AELQEGAR(Q)	14.11	0.006	30777.3	5.56	0.000669162	0.000475312	0.000217813	0	0	0	0	0	0	0	0	0
P02647	Apolipoprotein A-I	(R)AHVDALR(T)	15.01	0.003	30777.3	5.56	0.00267665	3.96449e-06	0.00047841	0	0	0	0	0	0	0	0	0
P02647	Apolipoprotein A-I	(R)QKLHELQEK(L)	14.73	0.003	30777.3	5.56	0	0.000121492	0	0	0	0	0	0	0	0	0	0
P02647	Apolipoprotein A-I	(R)VKDLATVYVDVLKDSGR(D)	18.76	<0.1%	30777.3	5.56	0	3.99646e-05	2.91714e-05	0	0	0	0	0	0	0	0	0
P02652	Apolipoprotein A-II	(K)KAGTELVNFLSYFVELGTQPATQ(-)	18.1	<0.1%	11288.9	6.27	0	4.73181e-05	0	0	0	0	0	0	0	0	0	0
P02652	Apolipoprotein A-II	(K)SPELQAEAK(S)	16.31	0.005	11288.9	6.27	0	1.03268e-05	0	0	0	0	0	0	0	0	0	0
P02750	Leucine-rich alpha-2-glycoprotein	(R)TLDLGENQLETLPPDLLR(G)	17.58	<0.1%	38405.4	6.46	0	2.25933e-05	1.84169e-05	0	0	0	0	0	0	0	0	0
P02763	Alpha-1-acid glycoprotein 1	(K)DKCEPLEK(Q)	16.71	<0.1%	23739.3	4.93	0.000491283	0.000260036	0.000210034	0	0	0	0	0	0	0	0	0
P02763	Alpha-1-acid glycoprotein 1	(K)NWGLSVYADKPETTK(E)	20.19	<0.1%	23739.3	4.93	0.000305782	0.000104547	0.000133799	0	0	0	0	0	0	0	0	0
P02763	Alpha-1-acid glycoprotein 1	(R)YVGGQEHFAHLLILRDTK(T)	14.79	0.003	23739.3	4.93	0	3.34637e-05	0	0	0	0	0	0	0	0	0	0
P02765	Alpha-2-HS-glycoprotein	(K)HTLNQIDEVK(V)	16.81	<0.1%	40122.7	5.43	0.00021896	0	9.1987e-05	0	0	0	0	0	0	0	0	0
P02766	Transthyretin	(K)ALGISPFHEHAEVVFTANDSGPR(R)	17.07	<0.1%	16000.8	5.52	0	0	0.000248929	0	0	0	0	0	0	0	0	0
P02766	Transthyretin	(K)ALGISPFHEHAEVVFTANDSGPRR(Y)	15.1	0.003	16000.8	5.52	0	4.76378e-05	0	0	0	0	0	0	0	0	0	0
P02766	Transthyretin	(R)GSPAINVAVHVFR(K)	25.2	<0.1%	16000.8	5.52	0	0.00020675	9.39318e-05	0	0	0	0	0	0	0	0	0
P02766	Transthyretin	(R)YTIAALLSPYSYSTTAVVTNPKE(-)	16.78	<0.1%	16000.8	5.52	0	2.62168e-05	0	0	0	0	0	0	0	0	0	0
P04196	Histidine-rich glycoprotein	(R)GGEGTGYFVDFSVR(N)	17.58	0.003	60547.1	7.11	0	3.63411e-05	0	0	0	0	0	0	0	0	0	0
P04264	Keratin, type II cytoskeletal 1	(K)YEELQITAGR(H)	13.87	0.006	66208.7	8.32	2.43948e-05	0	0	0	0	0	0	0	0	0	0	0
P06727	Apolipoprotein A-IV	(K)EAVEHLQK(S)	16.65	<0.1%	45398.2	5.28	6.52221e-05	5.48847e-05	0	0	0	0	0	0	0	0	0	0
P06727	Apolipoprotein A-IV	(K)LKEEIGKELEELR(A)	14.81	0.009	45398.2	5.28	8.55511e-05	5.3819e-05	8.0124e-05	0	0	0	0	0	0	0	0	0
P06727	Apolipoprotein A-IV	(K)SELTQQLNALFQDK(L)	24.22	<0.1%	45398.2	5.28	0.000112656	0.000362345	0.000272266	0	0	0	0	0	0	0	0	0
P06727	Apolipoprotein A-IV	(K)TLSLPELEQQQEQQQEQQQEQVQMLAPLES(-)	15.82	<0.1%	45398.2	5.28	0	0.000151333	5.48422e-05	0	0	0	0	0	0	0	0	0
P06727	Apolipoprotein A-IV	(R)LEPYADQLR(T)	19.1	<0.1%	45398.2	5.28	0.000157973	4.52932e-05	5.13416e-05	0	0	0	0	0	0	0	0	0
P06727	Apolipoprotein A-IV	(R)TQVNTQAEQLR(R)	13.84	0.008	45398.2	5.28	5.2093e-05	0	0	0	0	0	0	0	0	0	0	0
P19652	Alpha-1-acid glycoprotein 2	(K)TLMFGSYLDDEK(N)	22.96	<0.1%	23887.5	5.04	5.08224e-05	0.000153464	0.000181251	0	0	0	0	0	0	0	0	0
P19652	Alpha-1-acid glycoprotein 2	(K)TLMFGSYLDDEKNWGLSFYADKPETTK(E)	20.2	<0.1%	23887.5	5.04	0	3.87923e-05	5.48422e-05	0	0	0	0	0	0	0	0	0
P19652	Alpha-1-acid glycoprotein 2	(R)SDVMYTDWK(K)	20.13	<0.1%	23887.5	5.04	0.00042352	0.000116164	0.000352001	0	0	0	0	0	0	0	0	0
P25090	N-formyl peptide receptor 2	(R)VLTAVVASFFICWFPFQLVALLGTVWLKEMLFYGK(Y)	13.4	0.007	39420	8.73	0	1.80107e-05	0	0	0	0	0	0	0	0	0	0
P25311	Zinc-alpha-2-glycoprotein	(R)AGEVQEPELR(G)	18.34	<0.1%	34486.3	5.71	6.14104e-05	1.7691e-06	0	0	0	0	0	0	0	0	0	0
P25311	Zinc-alpha-2-glycoprotein	(R)YSLTYIYTGLSK(H)	21.36	<0.1%	34486.3	5.71	0	2.97336e-05	9.02367e-05	0	0	0	0	0	0	0	0	0
P31641	Sodium- and chloride-dependent taurine transporter	(R)DCMLLGCLNSGTSFVSGFAIFSILGFMAQEQGVDIADVAESGPGLAFIAYPKAVTMmPLPTFWSILFFImLLLLGLDSQFVEVEGQITSLVDLYPSFLR(K)	14.37	0.006	70912.8	7.69	0	0	4.10344e-06	0	0	0	0	0	0	0	0	0
P33778	Histone H2B type 1-B	(R)IAGEASRLAHYNKR(S)	13.83	0.006	13949.9	10.31	5.92928e-05	0	0	0	0	0	0	0	0	0	0	0
P51884	Lumican	(K)SLEYLDLSFNQIAR(L)	16.45	<0.1%	38770.6	6.16	0	1.19361e-05	0	0	0	0	0	0	0	0	0	0
P52209	6-phosphogluconate dehydrogenase, decarboxylating	(R)DYFGAHTYELLAKPGQFIHTNWTGHGGTVSSSSYNA(-)	14.07	0.007	53652.5	6.82	0	1.97159e-05	0	0	0	0	0	0	0	0	0	0
P55268	Laminin subunit beta-2	(R)LGLLLSVLAATLAQAPAPDVPGCSR(G)	15.63	<0.1%	203110	6.08	0	0	2.0031e-05	0	0	0	0	0	0	0	0	0
P55289	Cadherin-12	(K)VEASNLHLDHR(F)	14.35	<0.1%	88730	4.64	0	0	1.32632e-05	0	0	0	0	0	0	0	0	0
P62191	26S protease regulatory subunit 4	(K)APQETYADIGGLDNQIQEIKESVELPLTHPEYYEEmGIKPPKGVILYGPPGTGK(T)	15.04	0.002	49354.8	5.87	0	0	1.64526e-05	0	0	0	0	0	0	0	0	0
P98164	Low-density lipoprotein receptor-related protein 2	(R)GIPFTLSTQEDVMVPVSGNPSFFVGIDFDAQDSTIFFSDMSKHMIFKQK(I)	14.41	0.004	540719	4.89	0	1.59858e-05	0	0	0	0	0	0	0	0	0	0
Q01955	Collagen alpha-3(IV) chain	(R)CTVCEGPAIAIAVHSQTTDIPPCPHGWISLWKGFSFImFTSAGSEGTGQALASPGSCLEEFR(A)	14.75	0.002	163179	9.64	0	0	9.6071e-06	0	0	0	0	0	0	0	0	0
Q03111	Protein ENL	(K)LLRAGGVmVmPEGADTVSRPSPDYPmLPTIPLSAFSDPK(K)	13.47	0.009	62454.4	9	0	9.28244e-06	0	0	0	0	0	0	0	0	0	0
Q14814	Myocyte-specific enhancer factor 2D	(R)NSVSPGLPQRPASAGAMLGGDLNSANGACPSPVGNGYVSARASPGLLPVANGNSLNK(V)	13.78	0.004	56165	7.92	0	2.32327e-05	0	0	0	0	0	0	0	0	0	0
Q562E7	WD repeat-containing protein 81	(R)EGALRTPAGGWHSPPSPDmQELLR(S)	14	0.005	213519	5.37	0	0	1.86891e-05	0	0	0	0	0	0	0	0	0
Q5TB80	Centrosomal protein of 162 kDa	(R)LNKELDSNDSTHFKALHSNQANAELTDDEHENESK(H)	14.58	<0.1%	162454	5.36	0	0	6.49549e-06	0	0	0	0	0	0	0	0	0
Q674R7	Autophagy-related protein 9B	(R)APQLLLQTALAHmHYLPEEPGPGGRDRAYR(Q)	14.44	0.004	101987	9.44	0	1.90764e-05	0	0	0	0	0	0	0	0	0	0
Q68CP9	AT-rich interactive domain-containing protein 2	(-)mANSTGKAPPDER(R)	14.51	0.003	199042	7.11	0	3.96449e-07	0	0	0	0	0	0	0	0	0	0
Q8N6Y0	Usher syndrome type-1C protein-binding protein 1	(R)LLAQEEAAmDAGAQQNPQPSPEGSSVDKPTPQEVAFQLRSYVQRLQER(R)	15.03	<0.1%	76409.3	5.58	1.75337e-05	0	0	0	0	0	0	0	0	0	0	0
Q8NHS4	Clathrin heavy chain linker domain-containing protein 1	(R)NIGTMNTFKAVGK(I)	13.45	0.007	68275.5	6.09	0	2.73891e-05	0	0	0	0	0	0	0	0	0	0
Q8TAP6	Centrosomal protein of 76 kDa	(R)SKPVPCACEPDFHDGFLLEVHRESLGDGTRMADSTTmLSISDPIHmVLIK(T)	13.2	0.008	75724.4	6.32	0	7.69451e-06	0	0	0	0	0	0	0	0	0	0
Q8WTU2	Scavenger receptor cysteine-rich domain-containing group B protein	(R)QLGCGLALPVPRPLAFGQGRGPILLDNVECR(G)	14.9	0.003	62643.3	5.57	3.20605e-05	0	0	0	0	0	0	0	0	0	0	0
Q92536	Y+L amino acid transporter 2	(K)VVALIAIIVmGLVKLCQGHSEHFQDAFEGSSWDmGNLSLALYSALFSYSGWDTLNFVTEEIKNPER(N)	14.74	0.009	57568.1	5.63	0	0	1.2427e-05	0	0	0	0	0	0	0	0	0
Q96DY7	Mdm2-binding protein	(K)VFHYYGPALEFVQMIKLSDLPSCYmSDIEFELGLTNSTK(Q)	14.43	0.004	103389	8.33	0	2.34459e-05	0	0	0	0	0	0	0	0	0	0
Q9BRQ8	Apoptosis-inducing factor 2	(R)QEVKEILLR(K)	15	0.009	40640.1	9.3	0	0	1.67638e-05	0	0	0	0	0	0	0	0	0
Q9H3K2	Growth hormone-inducible transmembrane protein	(K)RAEVSPmYGVQK(Y)	15.7	<0.1%	37375.7	10.1	3.21028e-05	0	0	0	0	0	0	0	0	0	0	0
Q9NYQ8	Protocadherin Fat 2	(R)QGGGGPCLADGGYKGVGmRLSR(A)	13.88	0.007	482389	5	0	8.51512e-06	0	0	0	0	0	0	0	0	0	0
Q9P0X4	Voltage-dependent T-type calcium channel subunit alpha-1I	(R)LPYYATYCHTRLLIHSMCTSHYLDIFITFIICLNVVTMSLEHYNQPTSLETALK(Y)	13.87	0.003	248465	6.09	1.94396e-05	0	0	0	0	0	0	0	0	0	0	0
Q9P2D8	Protein unc-79 homolog	(R)CLENIATFmEALPMDSPSSLWTTISNQFQTFFAKLPCVLPLKCSLDSSLR(I)	14.63	0.005	299886	5.9	0	0	9.9766e-06	0	0	0	0	0	0	0	0	0
Q9UID3	Vacuolar protein sorting-associated protein 51 homolog	(R)GEFCSQGVREGLIVGFVHSMCQTAQSFCDSPGEKGGATPPALLLLLSR(L)	13.3	0.008	86953.6	6.06	2.32089e-05	0	0	0	0	0	0	0	0	0	0	0
Q9Y3T6	R3H and coiled-coil domain-containing protein 1	(R)VTLGEAGAR(A)	14	0.005	53657.9	5.93	0.000724219	5.31795e-06	6.47604e-05	0	0	0	0	0	0	0	0	0
Q9Y496	Kinesin-like protein KIF3A	(R)LQmLIIDNFIPRDYQEmIENYVHWNEDIGEWQLKCVAYTGNNmR(K)	14.23	0.003	80381.7	6.16	0	4.81706e-05	0	0	0	0	0	0	0	0	0	0
Abbreviations: CPLL, combinatorial peptide ligand libraries; FDR, false discovery rate; IMDP, immunodepletion; mw, molecular weight; pI, isoelectric poiint.

## Sheet: Suppl table 4
Supplementary table 4. Detailed information on 489 unique peptides which corresponding to 58 unique proteins for comparative purposes.
uniprot_id	entry_name	sequence	peptide score	peptide FDR	protein_mw	protein_pI	relative intensity
							Thermal_1	Thermal_2	Thermal_3	Untreated_1	Untreated_2	Untreated_3	CPLL_1	CPLL_2	CPLL_3	IMDP_1	IMDP_2	IMDP_3
B9A064	Immunoglobulin lambda-like polypeptide 5	(R)SYSCQVTHEGSTVEK(T)	22.24	<0.1%	23405.2	9.65	0	0	0	0	2.93226e-05	4.0725e-05	0.000126335	0	5.28181e-05	0	0	0
B9A064	Immunoglobulin lambda-like polypeptide 5	(K)ANPTVTLFPPSSEELQANK(A)	19.66	<0.1%	23405.2	9.65	0	0	0	0	4.50663e-05	1.31546e-05	0	0	0	0	0	0
B9A064	Immunoglobulin lambda-like polypeptide 5	(K)YAASSYLSLTPEQWK(S)	22.17	<0.1%	23405.2	9.65	0	0	0	0	7.24209e-05	4.12056e-05	0	0	0	0	0	0
P00450	Ceruloplasmin	(K)GAYPLSIEPIGVR(F)	19.47	<0.1%	123059	5.44	0	0	0	0	0.000117094	3.73013e-05	4.87862e-05	0	5.71297e-05	0	4.0221e-05	5.65509e-05
P00450	Ceruloplasmin	(K)DIASGLIGPLIICK(K)	22.97	<0.1%	123059	5.44	0	0	0	0	9.38717e-05	2.16239e-05	0	0	0	0	0.000198218	4.26123e-05
P00450	Ceruloplasmin	(K)EVGPTNADPVCLAK(M)	20.78	<0.1%	123059	5.44	0	0	0	0	0	0	3.47329e-05	0	2.91038e-05	0	3.07912e-05	9.08001e-05
P00734	Prothrombin	(R)TATSEYQTFFNPR(T)	21.66	<0.1%	71519	5.64	0	0	0	0	2.2238e-05	7.20797e-06	0.000267596	4.55653e-05	0.00027102	0	0	0
P00734	Prothrombin	(K)GQPSVLQVVNLPIVERPVCK(D)	23.56	<0.1%	71519	5.64	0	0	0	0	0	0	0.000557037	0.000194023	0.000160148	0	0	0
P00734	Prothrombin	(K)HQDFNSAVQLVENFCR(N)	25.1	<0.1%	71519	5.64	0	0	0	0	0	0	0.000133252	0.000140708	0.000255621	0	0	0
P00734	Prothrombin	(K)IYIHPR(Y)	19.66	<0.1%	71519	5.64	0	0	0	0	0	0	0.00013216	0	0.000133508	0	0	0
P00734	Prothrombin	(K)LAACLEGNCAEGLGTNYR(G)	24.59	<0.1%	71519	5.64	0	0	0	0	0	0	0.000130703	0	4.25008e-05	0	0	0
P00734	Prothrombin	(K)SPQELLCGASLISDR(W)	24.75	<0.1%	71519	5.64	0	0	0	0	0	0	0.000229732	4.23773e-05	0.000161688	0	0	0
P00734	Prothrombin	(R)ELLESYIDGR(I)	20.95	<0.1%	71519	5.64	0	0	0	0	0	0	0.000484222	0.00019952	9.73207e-05	0	0	0
P00734	Prothrombin	(R)GDACEGDSGGPFVMK(S)	24.3	<0.1%	71519	5.64	0	0	0	0	0	0	0.000320023	4.40263e-05	2.44842e-05	0	0	0
P00734	Prothrombin	(R)KSPQELLCGASLISDR(W)	22.84	<0.1%	71519	5.64	0	0	0	0	0	0	0	0.000162694	0.000183246	0	0	0
P00734	Prothrombin	(R)LAVTTHGLPCLAWASAQAK(A)	24	<0.1%	71519	5.64	0	0	0	0	0	0	0.000253033	3.89696e-05	9.90146e-05	0	0	0
P00734	Prothrombin	(R)SEGSSVNLSPPLEQCVPDR(G)	22.66	<0.1%	71519	5.64	0	0	0	0	0	0	0.000385921	0.000124769	0.000204805	0	0	0
P00734	Prothrombin	(R)SGIECQLWR(S)	18.25	<0.1%	71519	5.64	0	0	0	0	0	0	0.000359343	0.000103333	6.96028e-05	0	0	0
P00734	Prothrombin	(R)TFGSGEADCGLRPLFEK(K)	26.93	<0.1%	71519	5.64	0	0	0	0	0	0	0	0.00010773	0.000224823	0	0	0
P00738	Haptoglobin	(K)VTSIQDWVQK(T)	23.02	<0.1%	45889.1	6.13	0	8.36592e-06	4.35626e-05	0	9.66268e-05	0.000109321	0	0	0	0	0.000846758	0.00072879
P00738	Haptoglobin	(K)AVGDKLPECEADDGCPKPPEIAHGYVEHSVR(Y)	22.33	<0.1%	45889.1	6.13	0.000103762	6.06396e-05	7.46787e-05	0	0	0	0	0	0	0	8.62154e-05	0.000154918
P00738	Haptoglobin	(K)YVMLPVADQDQCIR(H)	23.25	<0.1%	45889.1	6.13	0	0	0	0	7.53729e-05	4.18663e-05	0	0	0	0	0.000452246	0.000262842
P00738	Haptoglobin	(R)TEGDGVYTLNNEK(Q)	21.04	<0.1%	45889.1	6.13	0.00020456	1.53464e-05	0.000178723	0	0	0	0	0	0	0	9.66074e-05	5.73474e-05
P00738	Haptoglobin	(K)LPECEADDGCPKPPEIAHGYVEHSVR(Y)	16.91	0.003	45889.1	6.13	0	4.15632e-05	4.93968e-05	0	0	0	0	0	0	0	0	0
P00738	Haptoglobin	(K)SPVGVQPILNEHTFCAGMSK(Y)	26.07	<0.1%	45889.1	6.13	0	0	0	0	0	0	0	0	0	0	0.000450321	0.00038152
P00738	Haptoglobin	(R)HYEGSTVPEKK(T)	17.78	<0.1%	45889.1	6.13	0	0	0	0	0	0	0	0	0	0	5.92731e-05	6.84983e-05
P00738	Haptoglobin	(R)VGYVSGWGR(N)	23.04	<0.1%	45889.1	6.13	0	0	0	0	0	0	0	0	0	0	3.09836e-05	0.000103544
P00739	Haptoglobin-related protein	(K)DIAPTLTLYVGK(K)	21.36	<0.1%	39542.3	6.64	0	4.26289e-05	0.000110268	0	0.000271579	5.92255e-05	0	0	0	0	0.000232858	7.6065e-05
P00739	Haptoglobin-related protein	(R)VMPICLPSK(N)	18.07	<0.1%	39542.3	6.64	4.2352e-06	1.80107e-05	6.02875e-05	0	0.000100169	0.000112925	0	0	0	0	0.000203992	0.000457983
P00739	Haptoglobin-related protein	(K)GSFPWQAK(M)	18.97	<0.1%	39542.3	6.64	0	0	0	0	4.27047e-05	3.83224e-05	0	0	0	0	3.77192e-05	9.35878e-05
P00739	Haptoglobin-related protein	(K)SCAVAEYGVYVK(V)	20.18	<0.1%	39542.3	6.64	0	0	0	0	5.92356e-05	5.94057e-05	0	0	0	0	0.000171084	0.000281958
P00739	Haptoglobin-related protein	(R)ILGGHLDAK(G)	18.03	<0.1%	39542.3	6.64	0	0	0	0	0	0	0	0	0	0	0.00013933	0.000280365
P00751	Complement factor B	(K)CLVNLIEK(V)	15.4	<0.1%	86900.6	6.68	0	0	0	0	0	0	0	0	0	0	4.31077e-05	6.13299e-05
P00751	Complement factor B	(K)EELLPAQDIK(A)	16.2	<0.1%	86900.6	6.68	0	0	0	0	0	0	0	0	0	0	2.44405e-06	5.21702e-05
P00751	Complement factor B	(R)FLCTGGVSPYADPNTCR(G)	19.07	<0.1%	86900.6	6.68	0	0	0	0	0	0	0	0	0	0	2.42481e-05	5.93387e-05
P01008	Antithrombin-III	(K)EQLQDMGLVDLFSPEK(S)	24.17	<0.1%	53057.9	6.32	0	2.03553e-05	6.51494e-05	0	2.65675e-05	4.4329e-06	0	0	0	0	8.40985e-05	3.02667e-05
P01008	Antithrombin-III	(R)DIPMNPMCIYR(S)	22.4	<0.1%	53057.9	6.32	1.68137e-05	8.0462e-05	0.000125048	0	5.82516e-05	2.48675e-05	0	0	0	0	0	0
P01008	Antithrombin-III	(R)EVPLNTIIFMGR(V)	22.95	<0.1%	53057.9	6.32	3.3331e-05	0.000109769	8.28467e-05	0	0	0	0	0	0	0	0.000188981	4.73913e-05
P01008	Antithrombin-III	(R)VAEGTQVLELPFK(G)	23.37	<0.1%	53057.9	6.32	0	5.58438e-05	0.000105406	0	0	0	0	0	0	0	4.96508e-05	2.79171e-05
P01008	Antithrombin-III	(R)DDLYVSDAFHK(A)	16.25	0.006	53057.9	6.32	0	0	0	0	0	0	0	0	0	0	7.65931e-06	3.46076e-06
P01008	Antithrombin-III	(R)VAEGTQVLELPFKGDDITMVLILPKPEK(S)	18.65	<0.1%	53057.9	6.32	0	1.37478e-05	6.88444e-05	0	0	0	0	0	0	0	0	0
P01009	Alpha-1-antitrypsin	(K)DTEEEDFHVDQVTTVK(V)	22.87	<0.1%	46906.8	5.37	8.85157e-05	4.2096e-05	3.2283e-05	0	8.38351e-05	1.95216e-05	0	0	0	0	0.00022901	0.000125448
P01009	Alpha-1-antitrypsin	(K)GTEAAGAMFLEAIPMSIPPEVK(F)	21.5	<0.1%	46906.8	5.37	5.33635e-05	4.55063e-05	0.000165888	0	2.9913e-05	5.31588e-06	0	0	0	0	0.000211689	9.23931e-05
P01009	Alpha-1-antitrypsin	(K)LSITGTYDLK(S)	22.91	<0.1%	46906.8	5.37	0.00016729	0.000134281	0.000233371	3.84215e-05	6.57299e-05	6.30698e-05	0	0	0	0	0.000121433	0.000219832
P01009	Alpha-1-antitrypsin	(K)VFSNGADLSGVTEEAPLK(L)	28.75	<0.1%	46906.8	5.37	3.71427e-05	0.000135347	0.000208089	0	0.000269611	0.00010812	0	0	0	0	0.000602353	0.000135802
P01009	Alpha-1-antitrypsin	(K)LQHLENELTHDIITK(F)	19.47	<0.1%	46906.8	5.37	0.000214301	3.41031e-05	0.000145468	6.16909e-05	0	0.000106918	0	0	0	0	0	0
P01009	Alpha-1-antitrypsin	(K)SVLGQLGITK(V)	19.96	<0.1%	46906.8	5.37	0.000376509	0.000107638	0	0	0	0	0	0	0	0.000142624	0.000748611	0.000406211
P01009	Alpha-1-antitrypsin	(K)AVLTIDEK(G)	17.83	<0.1%	46906.8	5.37	0.000124091	0	4.70631e-05	0	0	0	0	0	0	0	0	0
P01009	Alpha-1-antitrypsin	(K)FLEDVKK(L)	17.11	0.004	46906.8	5.37	0	0	0	0	0	0	0	0	0	0	0.000103535	0.000249302
P01009	Alpha-1-antitrypsin	(K)ITPNLAEFAFSLYR(Q)	26.7	<0.1%	46906.8	5.37	0	5.25401e-05	4.55073e-05	0	0	0	0	0	0	0	0	0
P01009	Alpha-1-antitrypsin	(K)KLSSWVLLMK(Y)	17.44	<0.1%	46906.8	5.37	0	0	0	0	0.000192467	3.49587e-05	0	0	0	0	0	0
P01009	Alpha-1-antitrypsin	(K)LYHSEAFTVNFGDTEEAKK(Q)	18.56	<0.1%	46906.8	5.37	0	5.6057e-05	0.000161609	0	0	0	0	0	0	0	0	0
P01009	Alpha-1-antitrypsin	(K)SPLFMGK(V)	15.77	<0.1%	46906.8	5.37	0	0	0	6.71024e-05	0	5.89252e-06	0	0	0	0	0	0
P01009	Alpha-1-antitrypsin	(K)TDTSHHDQDHPTFNK(I)	17.95	<0.1%	46906.8	5.37	0	0	0	0	0	0	0	0	0	0	3.40628e-05	0.000119872
P01009	Alpha-1-antitrypsin	(R)LGMFNIQHCK(K)	20.55	<0.1%	46906.8	5.37	0	0	0	0	0	0	0	0	0	0	0.000163771	4.46036e-05
P01009	Alpha-1-antitrypsin	(R)SASLHLPK(L)	18.04	<0.1%	46906.8	5.37	0	0	0	0	0	0	0	0	0	0	6.92802e-05	5.09755e-05
P01011	Alpha-1-antichymotrypsin	(K)AVLDVFEEGTEASAATAVK(I)	26.56	<0.1%	47821.2	5.33	0	5.73358e-07	1.68805e-06	0	6.71074e-06	1.98219e-06	0	0	0	0	0.000176087	3.92671e-05
P01011	Alpha-1-antichymotrypsin	(K)ITLLSALVETR(T)	24	<0.1%	47821.2	5.33	0	0	0	0	3.68009e-05	1.82001e-05	0	0	0	0	0.000186287	5.69492e-05
P01011	Alpha-1-antichymotrypsin	(R)EIGELYLPK(F)	16.79	<0.1%	47821.2	5.33	0	0	0	0	1.87743e-05	2.08431e-05	0	0	0	0	0.000121625	9.7172e-05
P01011	Alpha-1-antichymotrypsin	(R)LYGSEAFATDFQDSAAAK(K)	24.34	<0.1%	47821.2	5.33	0	0	0	0	3.01098e-05	2.3486e-05	0	0	0	0	0	0
P01019	Angiotensinogen	(K)VLSALQAVQGLLVAQGR(A)	18.03	<0.1%	53438.5	5.87	0	0	0	0	1.08041e-05	8.10897e-06	0	0	0	0	0	0
P01019	Angiotensinogen	(R)SLDFTELDVAAEK(I)	20.43	<0.1%	53438.5	5.87	0	0	0	0	4.99862e-05	1.63381e-05	0	0	0	0	0	0
P01023	Alpha-2-macroglobulin	(K)AIGYLNTGYQR(Q)	23.22	<0.1%	164714	6.03	0	0	0	4.96233e-05	0	1.57374e-05	0	0	0	0.000134866	9.62225e-05	0.000144165
P01023	Alpha-2-macroglobulin	(K)ATVLNYLPK(C)	17.96	<0.1%	164714	6.03	0	0	0	0	0.000257803	6.36704e-05	0	0	0	0.000121738	0.000467641	0.000164476
P01023	Alpha-2-macroglobulin	(K)DTVIKPLLVEPEGLEK(E)	24.09	<0.1%	164714	6.03	0	0	0	5.8444e-05	0.000156059	2.34259e-05	0	0	0	0.000229153	0.00103343	0.000193946
P01023	Alpha-2-macroglobulin	(K)MVSGFIPLKPTVK(M)	22.77	<0.1%	164714	6.03	0	0	0	5.41148e-05	0	4.55904e-05	0	0	0	0.000156946	0.00038489	0.00016129
P01023	Alpha-2-macroglobulin	(K)NEDSLVFVQTDK(S)	19.97	<0.1%	164714	6.03	0	0	0	4.97315e-05	7.39953e-05	9.97103e-06	0	0	0	0.000126512	0.000219387	0.000191556
P01023	Alpha-2-macroglobulin	(R)SLFTDLEAENDVLHCVAFAVPK(S)	23.57	<0.1%	164714	6.03	0	0	0	0	5.82516e-05	3.12946e-06	0	0	0	0	0.000382966	7.7658e-05
P01023	Alpha-2-macroglobulin	(R)VGFYESDVMGR(G)	25.39	<0.1%	164714	6.03	0	0	0	0	3.56201e-05	1.45961e-05	0	0	0	6.5046e-05	0.000373343	0.000194344
P01023	Alpha-2-macroglobulin	(R)VSVQLEASPAFLAVPVEK(E)	22.43	<0.1%	164714	6.03	0	0	0	0	0.000163341	7.38817e-06	0	0	0	0	0.000271347	2.43727e-05
P01023	Alpha-2-macroglobulin	(R)VTAAPQSVCALR(A)	23	<0.1%	164714	6.03	0	0	0	0	2.63707e-05	8.34924e-06	0	0	0	0.000177832	0.000153956	0.000132218
P01023	Alpha-2-macroglobulin	(K)ALLAYAFALAGNQDK(R)	21.55	<0.1%	164714	6.03	0	0	0	0	5.86452e-05	1.00311e-05	0	0	0	0	0	0
P01023	Alpha-2-macroglobulin	(K)FEVQVTVPK(I)	16.55	<0.1%	164714	6.03	0	0	0	0	0	0	0	0	0	0	9.46829e-05	0.000125448
P01023	Alpha-2-macroglobulin	(K)HYDGSYSTFGER(Y)	16.45	<0.1%	164714	6.03	0	0	0	0	0	0	0	0	0	0	6.06202e-05	3.03862e-05
P01023	Alpha-2-macroglobulin	(K)LPPNVVEESAR(A)	21.52	<0.1%	164714	6.03	0	0	0	0	0	0	0	0	0	0.000228556	0.000304063	0.000142174
P01023	Alpha-2-macroglobulin	(K)QQNAQGGFSSTQDTVVALHALSK(Y)	18.01	<0.1%	164714	6.03	0	0	0	0	0	0	0	0	0	0	6.46615e-05	8.68177e-05
P01023	Alpha-2-macroglobulin	(K)SIYKPGQTVK(F)	18.86	<0.1%	164714	6.03	0	0	0	0	0	0	0	0	0	0	0.000252103	0.000107526
P01023	Alpha-2-macroglobulin	(K)VDLSFSPSQSLPASHAHLR(V)	23.46	<0.1%	164714	6.03	0	0	0	0	0	0	0	0	0	0	5.90806e-05	6.84983e-05
P01023	Alpha-2-macroglobulin	(R)DLKPAIVK(V)	15.39	<0.1%	164714	6.03	0	0	0	0	0	0	0	0	0	0	0.00015742	0.000170848
P01023	Alpha-2-macroglobulin	(R)IAQWQSFQLEGGLK(Q)	24.15	<0.1%	164714	6.03	0	0	0	0	0.000184595	2.22246e-05	0	0	0	0	0	0
P01023	Alpha-2-macroglobulin	(R)LLIYAVLPTGDVIGDSAK(Y)	20.79	<0.1%	164714	6.03	0	0	0	0	6.55331e-05	8.70963e-06	0	0	0	0	0	0
P01023	Alpha-2-macroglobulin	(R)LLLQQVSLPELPGEYSMK(V)	18	<0.1%	164714	6.03	0	0	0	0	6.92722e-05	6.84757e-06	0	0	0	0	0	0
P01023	Alpha-2-macroglobulin	(R)QGIPFFGQVR(L)	18.35	<0.1%	164714	6.03	0	0	0	0	0	0	0	0	0	0	0.000307912	0.000102349
P01023	Alpha-2-macroglobulin	(R)SASNMAIVDVK(M)	20.87	<0.1%	164714	6.03	0	0	0	0	0	0	0	0	0	9.78674e-05	4.13757e-05	4.34088e-05
P01023	Alpha-2-macroglobulin	(R)SSGSLLNNAIK(G)	20.93	<0.1%	164714	6.03	0	0	0	0	0	0	0	0	0	0.000157543	2.67499e-05	5.89404e-05
P01023	Alpha-2-macroglobulin	(R)TEHPFTVEEFVLPK(F)	20.57	<0.1%	164714	6.03	0	0	0	0	0	0	0	0	0	0.000238104	0.00105267	8.48264e-05
P01023	Alpha-2-macroglobulin	(R)TEVSSNHVLIYLDK(V)	23.95	<0.1%	164714	6.03	0	0	0	0	0	0	0	0	0	0	0.000433001	0.000104739
P01023	Alpha-2-macroglobulin	(R)VVSMDENFHPLNELIPLVYIQDPK(G)	19.94	<0.1%	164714	6.03	0	0	0	0	0	0	0	0	0	0	0.000140677	0.000150139
P01024	Complement C3	(R)ILLQGTPVAQMTEDAVDAER(L)	26.61	<0.1%	188685	6.02	0	0	0	6.43967e-05	0.000188531	2.22246e-05	2.77062e-05	0	3.91131e-05	0.000278087	0.00063122	0.000188769
P01024	Complement C3	(R)SNLDEDIIAEENIVSR(S)	25.85	<0.1%	188685	6.02	0	0	0	0	0.000164325	2.83514e-05	0	0.000113776	3.07977e-05	0	0.000458019	0.000135802
P01024	Complement C3	(R)VPVAVQGEDTVQSLTQGDGVAK(L)	27.5	<0.1%	188685	6.02	0	0	0	6.49378e-05	0.00013756	2.46873e-05	0	5.71627e-06	2.55621e-05	0.000426081	0.000227085	0.000288728
P01024	Complement C3	(K)AGDFLEANYMNLQR(S)	22.67	<0.1%	188685	6.02	0	0	0	0	0.000122998	3.0754e-05	0	0	0	0	0.000194369	3.859e-05
P01024	Complement C3	(K)DFDFVPPVVR(W)	17.25	<0.1%	188685	6.02	0	0	0	0	2.69611e-05	1.33948e-05	0	0	0	7.34006e-05	0.000168389	0.000105933
P01024	Complement C3	(K)DICEEQVNSLPGSITK(A)	25.67	<0.1%	188685	6.02	0	0	0	0	2.9913e-05	1.64582e-05	0	0	0	0.000131882	0.000248254	0.000191955
P01024	Complement C3	(K)IWDVVEK(A)	16.27	<0.1%	188685	6.02	0	0	0	6.71024e-05	0	9.55056e-06	0	0	0	0.000239298	0	9.15966e-05
P01024	Complement C3	(K)LMNIFLK(D)	16.82	0.004	188685	6.02	0	0	0	0	9.24941e-05	2.67296e-05	0	0	0	8.95129e-05	0.000105845	8.88089e-05
P01024	Complement C3	(K)SSLSVPYVIVPLK(T)	20.45	<0.1%	188685	6.02	0	0	0	0	0.000146023	1.88609e-05	0	0	0	6.86266e-05	0.000571562	0.000113102
P01024	Complement C3	(K)TIYTPGSTVLYR(I)	21.11	<0.1%	188685	6.02	0	0	0	0	2.97162e-05	1.39955e-05	0	0	0	0.000112189	0.000313685	6.05334e-05
P01024	Complement C3	(R)IPIEDGSGEVVLSR(K)	26.95	<0.1%	188685	6.02	0	0	0	5.41148e-05	0	2.38464e-05	0	0	0	0.000238104	0.000365645	0.000306251
P01024	Complement C3	(R)LVAYYTLIGASGQR(E)	24	<0.1%	188685	6.02	0	0	0	0	8.65902e-05	2.4447e-05	0	0	0	2.3333e-05	0.000323308	7.80562e-05
P01024	Complement C3	(R)TVMVNIENPEGIPVK(Q)	23.85	<0.1%	188685	6.02	0	0	0	0	0.000236155	6.24691e-05	0	0	0	0.000118754	0.000440699	0.000164077
P01024	Complement C3	(K)DSCVGSLVVK(S)	15.26	0.02	188685	6.02	0	0	0	0	0	0	0	0	0	0.000242878	0	3.87892e-06
P01024	Complement C3	(K)EDIPPADLSDQVPDTESETR(I)	17.08	0.004	188685	6.02	0	0	0	0	0	0	0	0	0	0	2.23236e-05	2.25407e-05
P01024	Complement C3	(K)GQGTLSVVTMYHAK(A)	21.79	<0.1%	188685	6.02	0	0	0	0	0	0	0	0	0	5.44835e-05	0.000128938	8.64194e-05
P01024	Complement C3	(K)GYTQQLAFR(Q)	16.88	<0.1%	188685	6.02	0	0	0	0	0	0	0	0	0	4.97692e-05	0	4.50018e-05
P01024	Complement C3	(K)LSINTHPSQKPLSITVR(T)	19.44	<0.1%	188685	6.02	0	0	0	0	0	0	0	0	0	0.0001838	0.000102958	0.000219434
P01024	Complement C3	(K)SGSDEVQVGQQR(T)	19.29	<0.1%	188685	6.02	0	0	0	0	0	0	0	0	0	7.93681e-05	1.01803e-05	7.68615e-05
P01024	Complement C3	(K)VFLDCCNYITELR(R)	27.07	<0.1%	188685	6.02	0	0	0	0	0.000119455	2.55883e-05	0	0	0	0	0	0
P01024	Complement C3	(K)VLLDGVQNPR(A)	20.62	<0.1%	188685	6.02	0	0	0	0	0	0	0	0	0	0.000213041	6.60086e-05	7.16843e-05
P01024	Complement C3	(K)VYAYYNLEESCTR(F)	24.25	<0.1%	188685	6.02	0	0	0	0	0	0	0	0	0	0	0.000101034	7.32773e-05
P01024	Complement C3	(R)EVVADSVWVDVK(D)	20.91	<0.1%	188685	6.02	0	0	0	0	4.46727e-05	2.57685e-05	0	0	0	0	0	0
P01024	Complement C3	(R)FISLGEACK(K)	17.69	<0.1%	188685	6.02	0	0	0	0	0	0	0	0	0	0.00014143	3.42552e-05	9.08001e-05
P01024	Complement C3	(R)IHWESASLLR(S)	15.83	<0.1%	188685	6.02	0	0	0	0	0	0	0	0	0	0	6.08126e-05	0.000120669
P01024	Complement C3	(R)ISLPESLK(R)	16.32	<0.1%	188685	6.02	0	0	0	0	0	0	0	0	0	0.000168881	3.19459e-05	0.000111509
P01024	Complement C3	(R)QPSSAFAAFVK(R)	19.5	<0.1%	188685	6.02	0	0	0	0	0	0	0	0	0	9.07064e-05	8.15967e-05	4.97808e-05
P01024	Complement C3	(R)YYTYLIMNK(G)	17.22	<0.1%	188685	6.02	0	0	0	0	6.14004e-06	1.06918e-06	0	0	0	0	0	0
P01591	Immunoglobulin J chain	(K)CYTAVVPLVYGGETK(M)	20.31	<0.1%	18554.7	5.12	2.61735e-05	0.000224867	4.45349e-05	0	0	0	0	0	0	0	0	0
P01591	Immunoglobulin J chain	(K)MVETALTPDACYPD(-)	20.7	<0.1%	18554.7	5.12	0.000186349	6.65011e-05	4.66742e-05	0	0	0	0	0	0	0	0	0
P01591	Immunoglobulin J chain	(R)FVYHLSDLCK(K)	20.45	<0.1%	18554.7	5.12	0.000305358	4.96626e-06	0	0	0	0	0	0	0	0	0	0
P01591	Immunoglobulin J chain	(R)IIVPLNNR(E)	20.9	<0.1%	18554.7	5.12	0.000131291	2.54708e-05	1.75028e-05	0	0	0	0	0	0	0	0	0
P01620	Ig kappa chain V-III region SIE	(-)EIVLTQSPGTLSLSPGER(A)	22.8	<0.1%	11889	9.11	0	0	0	0	7.39953e-05	6.30698e-05	0	0	0	0	0	0
P01620	Ig kappa chain V-III region SIE	(R)FSGSGSGTDFTLTISR(L)	28.75	<0.1%	11889	9.11	0	0	0	0	0.000137364	2.86517e-05	0	0	0	0	0	0
P01834	Ig kappa chain C region	(-)TVAAPSVFIFPPSDEQLK(S)	22.09	<0.1%	11779.8	5.58	4.36226e-05	6.76733e-05	6.43715e-05	0.000270574	0.000911166	0.000182001	0.000138713	2.37995e-05	0.000255621	0	0	0
P01834	Ig kappa chain C region	(K)DSTYSLSSTLTLSK(A)	20.87	<0.1%	11779.8	5.58	9.61391e-05	0.000596804	0.00052314	4.43201e-05	6.73042e-05	0.000589252	7.68201e-05	0	0.000134586	0	0	0
P01834	Ig kappa chain C region	(K)VDNALQSGNSQESVTEQDSK(D)	27	<0.1%	11779.8	5.58	3.79898e-05	0	2.33371e-05	0.000198601	1.43268e-05	1.70589e-05	0.000222815	0	3.77272e-05	0	0	0
P01834	Ig kappa chain C region	(K)SGTASVVCLLNNFYPR(E)	21.24	<0.1%	11779.8	5.58	0	5.56307e-05	2.83935e-05	0	0.000226315	0.000264292	0	0	0	0	0	0
P01834	Ig kappa chain C region	(K)VYACEVTHQGLSSPVTK(S)	25.35	<0.1%	11779.8	5.58	0	1.86501e-05	3.57835e-05	0	7.00594e-05	9.3103e-05	0	0	0	0	0	0
P01834	Ig kappa chain C region	(K)VDNALQSGNSQESVTEQDSKDSTYSLSSTLTLSK(A)	18.16	<0.1%	11779.8	5.58	0	0	0	0	0.000216476	2.51678e-05	0	0	0	0	0	0
P01857	Ig gamma-1 chain C region	(K)GPSVFPLAPSSK(S)	19.03	<0.1%	36618.7	8.92	0.00011435	0	8.4208e-05	0.00128252	2.44027e-05	0.000228853	0.00038228	0.000189626	6.6523e-05	0	0	0
P01857	Ig gamma-1 chain C region	(K)NQVSLTCLVK(G)	18.7	<0.1%	36618.7	8.92	0.000163479	0	0.000123492	0.00128793	0.000493958	0.000148965	0.000611648	0.000211612	8.14599e-05	0	0	0
P01857	Ig gamma-1 chain C region	(K)STSGGTAALGCLVK(D)	23.7	<0.1%	36618.7	8.92	4.27755e-05	0	4.49239e-05	0.00116347	0.00039556	0.000201223	0.000418688	4.4411e-05	3.34155e-05	0	0	0
P01857	Ig gamma-1 chain C region	(K)ALPAPIEK(T)	18.28	<0.1%	36618.7	8.92	0	0	0	0.00054656	1.79084e-05	2.65494e-05	0.000206795	3.61114e-05	0	0	0	0
P01857	Ig gamma-1 chain C region	(R)TPEVTCVVVDVSHEDPEVK(F)	27.33	<0.1%	36618.7	8.92	0	0	0	0.000649378	0.000307002	5.40598e-05	0.00026796	7.47512e-05	0.000111642	0	0	0
P01857	Ig gamma-1 chain C region	(R)VVSVLTVLHQDWLNGK(E)	25.94	<0.1%	36618.7	8.92	0	0	0	0	0.000140119	0.00028892	0.000164927	0	2.78719e-06	0	0	0
P01857	Ig gamma-1 chain C region	(K)FNWYVDGVEVHNAK(T)	25.01	<0.1%	36618.7	8.92	0	0	0	0.000203472	0.000411304	6.30698e-05	0	0	0	0	0	0
P01857	Ig gamma-1 chain C region	(K)THTCPPCPAPELLGGPSVFLFPPKPK(D)	19.76	<0.1%	36618.7	8.92	0	0	0	0.000107689	0.000200732	2.1684e-05	0	0	0	0	0	0
P01857	Ig gamma-1 chain C region	(K)TTPPVLDSDGSFFLYSK(L)	25.42	<0.1%	36618.7	8.92	0	0	0	6.22321e-05	0.000273546	0.000161579	0	0	0	0	0	0
P01857	Ig gamma-1 chain C region	(R)EPQVYTLPPSR(D)	18.49	<0.1%	36618.7	8.92	0	0	0	0.000340924	5.51029e-05	3.37573e-05	0	0	0	0	0	0
P01857	Ig gamma-1 chain C region	(R)EPQVYTLPPSRDELTK(N)	19.37	<0.1%	36618.7	8.92	0	0	0	0.000432919	4.88054e-05	0	0	0	0	0	0	0
P01857	Ig gamma-1 chain C region	(R)WQQGNVFSCSVMHEALHNHYTQK(S)	17.76	<0.1%	36618.7	8.92	0	0	0	0	0.000104892	5.424e-05	0	0	0	0	0	0
P01859	Ig gamma-2 chain C region	(K)GPSVFPLAPCSR(S)	19.53	<0.1%	36527.6	8.02	0	0	0	0.000763019	0.000387688	0.000339375	0.000258494	0.000120921	4.54266e-05	0	0	0
P01859	Ig gamma-2 chain C region	(R)STSESTAALGCLVK(D)	24.06	<0.1%	36527.6	8.02	0	0	0	0.000741373	0.000517574	0.000151367	0.000219174	7.14534e-05	0	0	0	0
P01859	Ig gamma-2 chain C region	(K)GLPAPIEK(T)	16.96	<0.1%	36527.6	8.02	0	0	0	0.000250011	0	2.31856e-05	0	0	0	0	0	0
P01859	Ig gamma-2 chain C region	(K)TTPPMLDSDGSFFLYSK(L)	24.54	<0.1%	36527.6	8.02	0	0	0	0	0.000521509	0.000118932	0	0	0	0	0	0
P01859	Ig gamma-2 chain C region	(R)VVSVLTVVHQDWLNGK(E)	25	<0.1%	36527.6	8.02	0	0	0	6.33144e-06	0.000525445	4.75126e-05	0	0	0	0	0	0
P01861	Ig gamma-4 chain C region	(K)TTPPVLDSDGSFFLYSR(L)	26.16	<0.1%	36453.4	7.26	0	0	0	0	4.19176e-05	1.91011e-05	0	0	0	0	0	0
P01871	Ig mu chain C region	(K)NVPLPVIAELPPK(V)	21.04	<0.1%	49990.3	6.35	0	0	0	0.000173168	6.15972e-05	0	0.000396843	4.73241e-05	0.000119187	0.000107415	7.04349e-05	0
P01871	Ig mu chain C region	(K)YVTSAPMPEPQAPGR(Y)	21.19	<0.1%	49990.3	6.35	0	0	0	0.0001223	1.35592e-05	6.60731e-06	0.000513348	2.33048e-05	2.51001e-06	7.34006e-05	1.64156e-05	0
P01871	Ig mu chain C region	(K)LICQATGFSPR(Q)	23.29	<0.1%	49990.3	6.35	0	0	0	0	0	0	0.000473299	1.2257e-05	9.08532e-07	7.34006e-05	1.79166e-05	0
P01871	Ig mu chain C region	(K)VSVFVPPR(D)	19.5	<0.1%	49990.3	6.35	0	0	0	0.000106606	5.52997e-06	0	0.000289077	0	1.09794e-05	0	0	0
P01876	Ig alpha-1 chain C region	(R)DASGVTFTWTPSSGK(S)	20.77	<0.1%	38509.8	6.08	0	0	0	2.8248e-05	8.52127e-05	7.6885e-05	2.20266e-05	0	1.66308e-05	0	0	0
P01876	Ig alpha-1 chain C region	(R)WLQGSQELPR(E)	21.12	<0.1%	38509.8	6.08	0	0	0	8.98306e-05	0.000108435	5.3339e-05	5.31552e-05	0	3.60333e-06	0	0	0
P01876	Ig alpha-1 chain C region	(K)SAVQGPPER(D)	16.32	<0.1%	38509.8	6.08	0	0	0	0	0.000108631	9.97103e-06	0	0	0	0	0	0
P01876	Ig alpha-1 chain C region	(K)SGNTFRPEVHLLPPPSEELALNELVTLTCLAR(G)	15.84	<0.1%	38509.8	6.08	0	5.19007e-05	3.36443e-06	0	0	0	0	0	0	0	0	0
P01876	Ig alpha-1 chain C region	(R)NFPPSQDASGDLYTTSSQLTLPATQCLAGK(S)	16.39	0.002	38509.8	6.08	0	0	0	0	2.36155e-05	2.5288e-05	0	0	0	0	0	0
P01876	Ig alpha-1 chain C region	(R)QEPSQGTTTFAVTSILR(V)	24.52	<0.1%	38509.8	6.08	0	0	0	0	0.000117094	6.36704e-05	0	0	0	0	0	0
P02647	Apolipoprotein A-I	(K)AKPALEDLR(Q)	19.22	<0.1%	30777.3	5.56	0.00290958	0.000165187	0.000779848	0	8.91486e-06	1.61579e-05	0.000640775	0.000130265	9.45489e-05	0	0.00071782	8.28352e-05
P02647	Apolipoprotein A-I	(K)ATEHLSTLSEK(A)	23.2	<0.1%	30777.3	5.56	0.00318911	0.000101244	0.000785682	0	2.93226e-05	3.94637e-06	0.000320023	7.47512e-05	0.000218664	0	0.000255952	0.000673036
P02647	Apolipoprotein A-I	(K)DLATVYVDVLK(D)	22.48	<0.1%	30777.3	5.56	8.85157e-05	5.6057e-05	0.00131855	0	0.000320778	3.15949e-07	5.02426e-05	0	0.000277179	0	6.98575e-06	2.25407e-06
P02647	Apolipoprotein A-I	(K)LHELQEK(L)	16.34	<0.1%	30777.3	5.56	0.00153314	1.92896e-05	0.000598985	0	0.000111977	2.84114e-05	0.000140898	0	0.000232523	0	0.000184555	0.000287534
P02647	Apolipoprotein A-I	(K)LLDNWDSVTSTFSK(L)	27.35	<0.1%	30777.3	5.56	0.00376509	0.000352754	0.000336443	0	0.00031881	0.000219843	0.000374999	0.000194573	0.00226363	0	0.0038489	0.000161688
P02647	Apolipoprotein A-I	(K)LSPLGEEMR(D)	23.45	<0.1%	30777.3	5.56	0.00323993	0.00056803	0.00100738	9.8489e-05	1.0135e-05	3.77818e-05	0.000699027	0.000136861	0.000117031	0.000119351	0.000448397	0.000259258
P02647	Apolipoprotein A-I	(K)VQPYLDDFQK(K)	20.43	<0.1%	30777.3	5.56	0.00753866	0.00141741	0.00153636	0	0.00027945	0.000107519	0.000626212	0.000289661	0.000609794	3.50891e-05	0.000671633	0.000361607
P02647	Apolipoprotein A-I	(K)VSFLSALEEYTK(K)	26	<0.1%	30777.3	5.56	0.00284182	0.00081208	0.00309216	0	0.000722241	5.01555e-05	0.000320023	0.000163243	0.00127656	0	0.00203992	0.000232576
P02647	Apolipoprotein A-I	(K)WQEEMELYR(Q)	19.3	<0.1%	30777.3	5.56	0.00223619	0.000100284	0.00119019	0	0.000100366	4.9735e-05	0.000189684	9.72865e-05	0.000218664	0	0.00109309	0.000160891
P02647	Apolipoprotein A-I	(R)DYVSQFEGSALGK(Q)	25.85	<0.1%	30777.3	5.56	0.00554811	9.16521e-05	0.00177751	2.48928e-05	0.000267643	0.000267896	0.000538833	0.000269874	0.000255621	3.80728e-05	0.000230934	0.000294304
P02647	Apolipoprotein A-I	(R)QGLLPVLESFK(V)	20.67	<0.1%	30777.3	5.56	0.00478578	8.05686e-05	0.00101905	0	0.000324713	0.000148965	0.0005716	0.000145655	0.000765323	0	0.000931434	0.000202707
P02647	Apolipoprotein A-I	(R)THLAPYSDELR(Q)	17.49	<0.1%	30777.3	5.56	0.002719	0.00042096	0.000688444	0	3.97528e-05	2.94926e-05	0.000768201	5.41397e-05	8.45397e-05	0	0.000798647	5.25685e-05
P02647	Apolipoprotein A-I	(R)EQLGPVTQEFWDNLEK(E)	26.17	<0.1%	30777.3	5.56	0.000396415	0.000109769	0.00250874	0	0.000176723	9.55056e-06	0	0	0	0	0.000331005	4.57983e-05
P02647	Apolipoprotein A-I	(R)LAEYHAK(A)	20.65	<0.1%	30777.3	5.56	0.00104186	1.90764e-05	0.000206144	0	0	0	0.000104854	5.46893e-05	0.000120881	0	0.000189943	0.000300278
P02647	Apolipoprotein A-I	(K)DSGRDYVSQFEGSALGK(Q)	21.93	<0.1%	30777.3	5.56	0.000427755	0.000623447	0	0	0	0	0	6.70562e-05	3.9883e-05	0	0	0
P02647	Apolipoprotein A-I	(K)LREQLGPVTQEFWDNLEK(E)	23.45	<0.1%	30777.3	5.56	0.000927509	0.00039112	2.10034e-05	0	0	0	0	0	0	0	8.60229e-05	0.000133014
P02647	Apolipoprotein A-I	(K)VQPYLDDFQKK(W)	20.22	<0.1%	30777.3	5.56	0.000253265	0.00016945	8.24577e-05	0	0	0	0.000117233	0	3.32615e-05	0	0	0
P02647	Apolipoprotein A-I	(R)EQLGPVTQEFWDNLEKETEGLR(Q)	21.85	<0.1%	30777.3	5.56	0.000163902	0.000104547	0.00036367	0	0	0	0	0	0	0	4.67641e-05	2.86737e-05
P02647	Apolipoprotein A-I	(R)VKDLATVYVDVLK(D)	24.95	<0.1%	30777.3	5.56	0.000341781	0.000469983	0.000606764	0	0	0	0	0	0	0	0.000290592	4.81878e-05
P02647	Apolipoprotein A-I	(K)KWQEEMELYR(Q)	19.6	<0.1%	30777.3	5.56	0.000125362	9.39967e-05	7.68179e-05	0	0	0	0	0	0	0	0	0
P02647	Apolipoprotein A-I	(K)LREQLGPVTQEFWDNLEKETEGLR(Q)	22.45	<0.1%	30777.3	5.56	0.000250724	0.000292008	0.000562035	0	0	0	0	0	0	0	0	0
P02647	Apolipoprotein A-I	(K)VSFLSALEEYTKK(L)	19.54	<0.1%	30777.3	5.56	8.17394e-05	6.68208e-05	0	0	0	0	0	0	0	0	0	0
P02647	Apolipoprotein A-I	(R)AHVDALR(T)	15.01	0.003	30777.3	5.56	0.00267665	3.96449e-06	0.00047841	0	0	0	0	0	0	0	0	0
P02647	Apolipoprotein A-I	(R)EQLGPVTQEFWDNLEKETEGLRQEMSK(D)	19.85	<0.1%	30777.3	5.56	0	0.000173713	0.000124659	0	0	0	0	0	0	0	0	0
P02647	Apolipoprotein A-I	(R)VKDLATVYVDVLKDSGR(D)	18.76	<0.1%	30777.3	5.56	0	3.99646e-05	2.91714e-05	0	0	0	0	0	0	0	0	0
P02649	Apolipoprotein E	(K)SELEEQLTPVAEETR(A)	23.22	<0.1%	36267.6	5.65	0	0	0	0	0	0	0.000206067	6.4308e-05	0.000110872	3.17472e-05	6.29295e-05	5.93387e-05
P02649	Apolipoprotein E	(R)AATVGSLAGQPLQER(A)	22.73	<0.1%	36267.6	5.65	0	0	0	0	0	0	0.000195145	2.96806e-05	7.26826e-05	6.98201e-05	0	1.96734e-05
P02649	Apolipoprotein E	(R)GEVQAMLGQSTEELR(V)	25	<0.1%	36267.6	5.65	0	0	0	0	0	0	0.000167111	3.43526e-05	0.000277179	0	6.98575e-05	2.46514e-05
P02649	Apolipoprotein E	(K)VQAAVGTSAAPVPSDNH(-)	19.54	<0.1%	36267.6	5.65	0	0	0	0	0	0	0.000178397	0	2.92578e-05	0	0	0
P02649	Apolipoprotein E	(R)AKLEEQAQQIR(L)	17.31	<0.1%	36267.6	5.65	0	0	0	0	0	0	6.6626e-05	0	8.68495e-05	0	0	0
P02649	Apolipoprotein E	(R)FWDYLR(W)	15.77	<0.1%	36267.6	5.65	0	0	0	0	0	0	5.93445e-05	0	2.09424e-05	0	0	0
P02652	Apolipoprotein A-II	(K)EPCVESLVSQYFQTVTDYGK(D)	23.69	<0.1%	11288.9	6.27	0	0.000103908	0.000166082	0	7.59633e-05	1.53169e-05	0	0	0	0	0.000101996	8.76141e-05
P02652	Apolipoprotein A-II	(K)SKEQLTPLIK(K)	18.44	<0.1%	11288.9	6.27	7.66571e-05	3.48491e-07	8.88754e-05	0	0	0	0	0	0	0	0.000191098	0.000256869
P02652	Apolipoprotein A-II	(K)VKSPELQAEAK(S)	21.39	<0.1%	11288.9	6.27	9.86802e-05	2.04619e-06	6.14543e-05	0	0	0	0	0	0	0	0.00028097	0.000352846
P02652	Apolipoprotein A-II	(K)AGTELVNFLSYFVELGTQPATQ(-)	19.72	<0.1%	11288.9	6.27	0	0.000153464	4.0062e-05	0	0	0	0	0	0	0	0	0
P02671	Fibrinogen alpha chain	(K)GLIDEVNQDFTNR(I)	23.48	<0.1%	95713	5.7	0	2.81351e-05	0.000111629	0.00010823	9.03294e-05	0.000139354	0.00211164	0.000972865	0.00384971	0.000284651	0.00144141	0.000649141
P02671	Fibrinogen alpha chain	(K)ALTDMPQMR(M)	18.63	<0.1%	95713	5.7	0	0	0	0.000162345	0	1.44159e-05	0.00208252	0.00042872	0.000186326	0.000460693	4.65717e-05	0.000109916
P02671	Fibrinogen alpha chain	(K)DSHSLTTNIMEILR(G)	25.61	<0.1%	95713	5.7	0	0	0	0	0.000174164	1.2614e-05	0.000637134	0.000209413	0.00151371	0	0.000606202	0.000148148
P02671	Fibrinogen alpha chain	(K)MKPVPDLVPGNFK(S)	20.86	<0.1%	95713	5.7	0	0	0	0.000142322	0.000195418	4.46294e-05	0.00174393	0.000344075	0.00133508	0.00044279	0.000731291	0.000352846
P02671	Fibrinogen alpha chain	(K)TVIGPDGHK(E)	17.93	<0.1%	95713	5.7	4.40461e-05	2.80285e-05	4.39515e-05	0	0	0	0.000300363	0.000186878	0.000337235	0.000130092	8.00571e-05	0.000296693
P02671	Fibrinogen alpha chain	(K)DSDWPFCSDEDWNYK(C)	24.99	<0.1%	95713	5.7	0	0	0	0	0	0	3.93203e-05	9.17901e-05	9.02373e-05	0	3.86814e-05	4.73913e-05
P02671	Fibrinogen alpha chain	(K)VPPEWK(A)	16.27	<0.1%	95713	5.7	0	0	0	0	0	0	0.000830094	0.000151701	6.12874e-05	0.000250039	4.23379e-05	0.000125448
P02671	Fibrinogen alpha chain	(K)VQHIQLLQK(N)	18.06	<0.1%	95713	5.7	0	0	0	0	0	0	0.00167111	0.000305601	0.000101478	0.000318069	0.000187634	0.000263639
P02671	Fibrinogen alpha chain	(R)EVDLKDYEDQQK(Q)	22.13	<0.1%	95713	5.7	0	0	0	0	0	0	0.00156917	0.000374306	8.17679e-05	0	0.000172623	0.0002497
P02671	Fibrinogen alpha chain	(R)GGSTSYGTGSETESPR(N)	23.9	<0.1%	95713	5.7	0	0	0	0	0	0	0.000329489	0.000151151	0.000160148	0.000128302	2.4633e-05	8.48264e-05
P02671	Fibrinogen alpha chain	(R)MELERPGGNEITR(G)	15.83	<0.1%	95713	5.7	0	0	0	0	0	0	0.00179126	0.000211612	0	0.000359245	0.000181476	0
P02671	Fibrinogen alpha chain	(K)ESSSHHPGIAEFPSR(G)	19.79	<0.1%	95713	5.7	0	0	0	0	0	0	0.000357523	0.000109379	6.88329e-05	0	0	0
P02671	Fibrinogen alpha chain	(K)NSLFEYQK(N)	17.19	<0.1%	95713	5.7	0	0	0	0	0	0	0.001125	0.000288562	0	0	0	0
P02671	Fibrinogen alpha chain	(K)QFTSSTSYNR(G)	17.64	<0.1%	95713	5.7	0	0	0	0	0	0	7.90046e-05	0	0.000119803	0	0	0
P02671	Fibrinogen alpha chain	(K)TFPGFFSPMLGEFVSETESR(G)	20.58	<0.1%	95713	5.7	0	5.00889e-05	2.46984e-05	0	0	0	0	0	0	0	0	0
P02671	Fibrinogen alpha chain	(R)GDFSSANNR(D)	16.16	<0.1%	95713	5.7	0	0	0	0	0	0	9.61162e-05	7.09037e-05	7.79182e-05	0	0	0
P02671	Fibrinogen alpha chain	(R)GSESGIFTNTK(E)	18.12	<0.1%	95713	5.7	0	0	0	0	0	0	0.000629852	0.000242941	0	0	0	0
P02671	Fibrinogen alpha chain	(R)HPDEAAFFDTASTGK(T)	24.76	<0.1%	95713	5.7	0	0	0	0	0	0	0.000629852	0.000161045	0.000278719	0	0	0
P02671	Fibrinogen alpha chain	(R)HRHPDEAAFFDTASTGK(T)	16.39	<0.1%	95713	5.7	0	0	0	0	0	0	0.00017949	0.000194023	0	0	0	0
P02671	Fibrinogen alpha chain	(R)NPSSAGSWNSGSSGPGSTGNR(N)	27.87	<0.1%	95713	5.7	0	0	0	0	0	0	0.000389562	9.45383e-05	0.000106098	0	0	0
P02675	Fibrinogen beta chain	(K)DNENVVNEYSSELEK(H)	23.86	<0.1%	56611.8	8.98	0	0	0	8.82072e-05	9.11166e-05	6.90764e-05	0.00156553	0.00101684	0.00142285	0.000213041	0.000371419	0.000397051
P02675	Fibrinogen beta chain	(K)IRPFFPQQ(-)	15.22	0.003	56611.8	8.98	0	0	0	0	2.77482e-05	7.74857e-05	0.00121602	0.00085744	0.000779182	0.000221395	0.000598504	0.000285542
P02675	Fibrinogen beta chain	(K)LESDVSAQMEYCR(T)	25	<0.1%	56611.8	8.98	0	0	0	3.49582e-05	0	1.20133e-05	0.000542474	0.000104432	0.000278719	0.000119947	4.67641e-05	8.88089e-05
P02675	Fibrinogen beta chain	(R)TPCTVSCNIPVVSGK(E)	26.7	<0.1%	56611.8	8.98	0	0	0	0.000114182	9.19037e-05	5.77239e-05	0.00225363	0.000742016	0.000919311	0.000481579	0.000162808	0.000669053
P02675	Fibrinogen beta chain	(K)AHYGGFTVQNEANK(Y)	21.84	<0.1%	56611.8	8.98	0	0	0	0	0	0	0.000586163	6.76059e-05	8.46937e-05	0	0.000111618	8.76141e-05
P02675	Fibrinogen beta chain	(K)EDGGGWWYNR(C)	20.35	<0.1%	56611.8	8.98	0	0	0	0	0	0	0.000152548	9.12404e-05	0.000142901	0	8.29438e-05	2.99083e-05
P02675	Fibrinogen beta chain	(K)GGETSEMYLIQPDSSVKPYR(V)	23.94	<0.1%	56611.8	8.98	0	0	0	0	0	0	0.000284344	0.000167641	0.000346474	2.23782e-05	0.00013221	0
P02675	Fibrinogen beta chain	(K)HQLYIDETVNSNIPTNLR(V)	24.32	<0.1%	56611.8	8.98	0	0	0	0	0	0	0	0.000111028	0.00039883	0	0.000202067	3.62802e-05
P02675	Fibrinogen beta chain	(K)NYCGLPGEYWLGNDK(I)	23.87	<0.1%	56611.8	8.98	0	0	0	0	8.85582e-05	6.36704e-06	8.11891e-05	3.60565e-05	0.000514322	0	0	0
P02675	Fibrinogen beta chain	(K)QGFGNVATNTDGK(N)	22.33	<0.1%	56611.8	8.98	0	0	0	0	0	0	0.000546115	0.000101684	6.85249e-05	0	0.000151454	0.000230186
P02675	Fibrinogen beta chain	(R)EEAPSLRPAPPPISGGGYR(A)	22.82	<0.1%	56611.8	8.98	0	0	0	0	0	0	0	0.000418827	0.000152449	9.30934e-05	0	8.88089e-05
P02675	Fibrinogen beta chain	(R)KAPDAGGCLHADPDLGVLCPTGCQLQEALLQQERPIR(N)	20.51	<0.1%	56611.8	8.98	0	0	0	0	0	0	5.02426e-05	0	0.000599015	0	7.02424e-05	0.000133811
P02675	Fibrinogen beta chain	(R)KGGETSEMYLIQPDSSVKPYR(V)	22.74	<0.1%	56611.8	8.98	0	0	0	0	4.07368e-05	3.88029e-05	0.000371358	0.00021491	0.000340315	0	0	0
P02675	Fibrinogen beta chain	(R)QDGSVDFGR(K)	15.56	0.002	56611.8	8.98	0	0	0	0	0	0	0.000330581	4.80386e-05	3.31075e-05	0	6.19673e-05	0.00019992
P02675	Fibrinogen beta chain	(R)SILENLR(S)	15.63	0.003	56611.8	8.98	0	0	0	0	0	0	0.00124878	0.000381451	4.91223e-05	4.76209e-05	1.38176e-05	0.000173237
P02675	Fibrinogen beta chain	(K)REEAPSLRPAPPPISGGGYR(A)	16.47	<0.1%	56611.8	8.98	0	0	0	0	0	0	0.000206795	0.000109379	4.18849e-05	0	0	0
P02675	Fibrinogen beta chain	(R)NSVDELNNNVEAVSQTSSSSFQYMYLLK(D)	21.22	<0.1%	56611.8	8.98	0	0	0	0	0	0	0	0.000230849	4.18849e-05	0	0	0
P02675	Fibrinogen beta chain	(R)VYCDMNTENGGWTVIQNR(Q)	29	<0.1%	56611.8	8.98	0	0	0	0	0	0	9.57521e-06	1.14875e-05	0.000151987	0	0	0
P02679	Fibrinogen gamma chain	(K)VAQLEAQCQEPCKDTVQIHDITGK(D)	21.57	<0.1%	52138.3	5.37	0	0	0	0.000148816	5.54965e-05	2.02424e-05	0	0.000314395	1.10718e-05	0.000118754	5.71562e-06	9.83668e-05
P02679	Fibrinogen gamma chain	(K)YEASILTHDSSIR(Y)	24.03	<0.1%	52138.3	5.37	0	0	0	0	2.83386e-05	1.88008e-05	0.00133616	0.000303402	0.000378812	9.30934e-05	8.87171e-05	0.000192353
P02679	Fibrinogen gamma chain	(K)AIQLTYNPDESSKPNMIDAATLK(S)	25.72	<0.1%	52138.3	5.37	0	0	0	0	0	0	0.00132524	0.000132464	0.000371112	0	0.000321383	9.31896e-05
P02679	Fibrinogen gamma chain	(K)EGFGHLSPTGTTEFWLGNEK(I)	23.75	<0.1%	52138.3	5.37	0	0	0	0	0	0	0.000132888	0	0.000206345	0	0.000130478	8.60212e-05
P02679	Fibrinogen gamma chain	(K)IHLISTQSAIPYALR(V)	20.17	<0.1%	52138.3	5.37	0	0	0	0	0	0	0.00176941	0.000354519	2.37142e-05	0	3.09836e-05	0.00023616
P02679	Fibrinogen gamma chain	(K)QSGLYFIKPLK(A)	21.78	<0.1%	52138.3	5.37	0	0	0	0	0	0	0.00071359	0.000187428	0.000622113	0	0.000814042	0.000175627
P02679	Fibrinogen gamma chain	(K)VGPEADKYR(L)	22.36	<0.1%	52138.3	5.37	0	0	0	0	0	0	0.000333858	6.48577e-05	0.000525101	0	0.000102766	0.000186379
P02679	Fibrinogen gamma chain	(R)DNCCILDER(F)	18.33	<0.1%	52138.3	5.37	0	0	0	0	0	0	0.000881065	0.000179733	3.68032e-05	0.000100254	0	6.81001e-05
P02679	Fibrinogen gamma chain	(R)LTIGEGQQHHLGGAK(Q)	25.37	<0.1%	52138.3	5.37	0	0	0	0	0	0	0.000604367	8.35455e-05	0.00067447	0	0.000198218	0.000212663
P02679	Fibrinogen gamma chain	(R)TSTADYAMFK(V)	20.3	<0.1%	52138.3	5.37	0	0	0	0	0	0	0.000768201	9.83858e-05	0.000147983	1.8738e-05	1.9129e-05	0.000124651
P02679	Fibrinogen gamma chain	(R)VELEDWNGR(T)	18.66	<0.1%	52138.3	5.37	0	0	0	0	0	0	0.00023046	2.05016e-05	8.28458e-05	0	9.46829e-06	5.69492e-06
P02679	Fibrinogen gamma chain	(R)YLQEIYNSNNQK(I)	23.97	<0.1%	52138.3	5.37	0	0	0	0	0	0	0.00101941	0.000179733	3.27995e-05	9.84642e-05	0.000153764	0.000163679
P02679	Fibrinogen gamma chain	(K)MLEEIMK(Y)	15.45	<0.1%	52138.3	5.37	0	0	0	0	0	0	0.000407766	0	3.34155e-05	0	0	0
P02679	Fibrinogen gamma chain	(R)KMLEEIMK(Y)	17.55	<0.1%	52138.3	5.37	0	0	0	0	0	0	0.000444173	0	8.74655e-06	0	0	0
P02679	Fibrinogen gamma chain	(R)LDGSVDFKK(N)	21.6	<0.1%	52138.3	5.37	0	0	0	0	0	0	0.000162014	0	0.000116569	0	0	0
P02746	Complement C1q subcomponent subunit B	(K)LEQGENVFLQATDK(N)	21.51	<0.1%	26949.5	9.2	0	0	0	0	0	0	0.000214805	8.84922e-05	0	0	0	0
P02746	Complement C1q subcomponent subunit B	(R)FDHVITNMNNNYEPR(S)	18.99	<0.1%	26949.5	9.2	0	0	0	0	0	0	2.60679e-05	0	3.72652e-05	0	0	0
P02747	Complement C1q subcomponent subunit C	(K)FQSVFTVTR(Q)	16.35	<0.1%	26001.4	9	0	0	0	0	0	0	0.000219174	0.000116524	6.05175e-05	0	5.50393e-05	8.44282e-05
P02747	Complement C1q subcomponent subunit C	(R)FNAVLTNPQGDYDTSTGK(F)	19.39	<0.1%	26001.4	9	0	0	0	0	0	0	0.000251941	0.000134662	0.000129042	0	0	0
P02750	Leucine-rich alpha-2-glycoprotein	(K)DLLLPQPDLR(Y)	19.98	<0.1%	38405.4	6.46	0	8.51512e-05	8.4208e-05	0	0	0	0	0	0	0	0	0
P02750	Leucine-rich alpha-2-glycoprotein	(R)TLDLGENQLETLPPDLLR(G)	17.58	<0.1%	38405.4	6.46	0	2.25933e-05	1.84169e-05	0	0	0	0	0	0	0	0	0
P02751	Fibronectin	(K)WLPSSSPVTGYR(V)	16.69	<0.1%	266214	5.46	0	0	0	0	0	0	6.99027e-05	0	2.47921e-05	0	8.42909e-05	5.89404e-05
P02751	Fibronectin	(R)EESPLLIGQQSTVSDVPR(D)	20.67	<0.1%	266214	5.46	0	0	0	0	0	0	2.94174e-05	0	2.6794e-05	0	0	0
P02751	Fibronectin	(R)ITYGETGGNSPVQEFTVPGSK(S)	20.52	<0.1%	266214	5.46	0	0	0	0	0	0	2.49028e-05	0	2.91038e-05	0	0	0
P02751	Fibronectin	(R)NLQPASEYTVSLVAIK(G)	21.64	<0.1%	266214	5.46	0	0	0	0	0	0	3.13834e-05	0	0.000108716	0	0	0
P02751	Fibronectin	(R)TYLGNALVCTCYGGSR(G)	15.95	<0.1%	266214	5.46	0	0	0	0	0	0	2.02791e-05	0	1.50755e-06	0	0	0
P02760	Protein AMBP	(R)GECVPGEQEPEPILIPR(V)	21.88	<0.1%	39911.7	5.95	0	0	0	0	4.07368e-06	1.06318e-05	0	0	0	0	0	0
P02760	Protein AMBP	(R)TVAACNLPIVR(G)	22.43	<0.1%	39911.7	5.95	0	0	0	0	0	0	0	0	0	5.5319e-05	6.54313e-05	5.21702e-05
P02763	Alpha-1-acid glycoprotein 1	(K)EQLGEFYEALDCLR(I)	24.66	<0.1%	23739.3	4.93	0.000258771	0.000911192	0.0013555	0	2.91258e-05	1.36351e-05	0	0	0	0	0.00010546	4.42053e-05
P02763	Alpha-1-acid glycoprotein 1	(K)SDVVYTDWK(K)	21.24	<0.1%	23739.3	4.93	0.00122821	0.000267496	0.00113963	0	0	0	0	0	0	0	1.33172e-05	5.73474e-05
P02763	Alpha-1-acid glycoprotein 1	(K)TEDTIFLR(E)	18.46	<0.1%	23739.3	4.93	0.00155855	0.000262168	0.00198365	0	0	0	0	0	0	0	5.56166e-06	6.13299e-06
P02763	Alpha-1-acid glycoprotein 1	(K)TYmLAFDVNDEKNWGLSVYADKPETTK(E)	22.85	<0.1%	23739.3	4.93	0	5.66964e-05	0.0001056	0	2.73546e-05	1.44159e-05	0	0	0	0	0	0
P02763	Alpha-1-acid glycoprotein 1	(K)WFYIASAFR(N)	17.21	<0.1%	23739.3	4.93	0.000111809	0.000115098	0.000180668	0	1.59405e-05	2.10233e-05	0	0	0	0	0	0
P02763	Alpha-1-acid glycoprotein 1	(R)YVGGQEHFAHLLILR(D)	28.86	<0.1%	23739.3	4.93	0.000859746	0.00042096	0.000412289	0	0.000107254	4.63112e-05	0	0	0	0	0	0
P02763	Alpha-1-acid glycoprotein 1	(K)DKCEPLEK(Q)	16.71	<0.1%	23739.3	4.93	0.000491283	0.000260036	0.000210034	0	0	0	0	0	0	0	0	0
P02763	Alpha-1-acid glycoprotein 1	(K)NWGLSVYADKPETTK(E)	20.19	<0.1%	23739.3	4.93	0.000305782	0.000104547	0.000133799	0	0	0	0	0	0	0	0	0
P02763	Alpha-1-acid glycoprotein 1	(K)TYMLAFDVNDEK(N)	21.03	<0.1%	23739.3	4.93	0.000152044	3.17585e-05	0.000748732	0	0	0	0	0	0	0	0	0
P02765	Alpha-2-HS-glycoprotein	(K)EHAVEGDCDFQLLK(L)	21.05	<0.1%	40122.7	5.43	5.67517e-05	3.30374e-05	0.00011513	0	0	0	3.09101e-05	5.99109e-05	0.000100554	0	0.000275196	0.000176821
P02765	Alpha-2-HS-glycoprotein	(K)HTLNQIDEVK(V)	16.81	<0.1%	40122.7	5.43	0.00021896	0	9.1987e-05	0	0	0	0	0	0	0	0	0
P02765	Alpha-2-HS-glycoprotein	(K)VWPQQPSGELFEIEIDTLETTCHVLDPTPVAR(C)	20.74	<0.1%	40122.7	5.43	0	0.000117229	0.000289769	0	0	0	0	0	0	0	0	0
P02765	Alpha-2-HS-glycoprotein	(R)AQLVPLPPSTYVEFTVSGTDCVAK(E)	17.41	<0.1%	40122.7	5.43	0	5.3073e-05	4.45349e-05	0	0	0	0	0	0	0	0	0
P02765	Alpha-2-HS-glycoprotein	(R)HTFMGVVSLGSPSGEVSHPR(K)	22.67	<0.1%	40122.7	5.43	0.000124938	0.000143872	0.000156164	0	0	0	0	0	0	0	0	0
P02766	Transthyretin	(K)AADDTWEPFASGK(T)	21.58	<0.1%	16000.8	5.52	7.75042e-05	7.92897e-05	0.000115713	0	0	0	0	0	0	0	0.000124127	6.65071e-05
P02766	Transthyretin	(K)TSESGELHGLTTEEEFVEGIYKVEIDTK(S)	23.07	<0.1%	16000.8	5.52	0	0.000108704	0.000166277	0	0	0	0	0	0	0	0	0
P02766	Transthyretin	(R)GSPAINVAVHVFR(K)	25.2	<0.1%	16000.8	5.52	0	0.00020675	9.39318e-05	0	0	0	0	0	0	0	0	0
P02768	Serum albumin	(K)LVNEVTEFAK(T)	23.91	<0.1%	71362.3	5.92	0.000567517	9.12258e-05	0.000676776	0.00507056	0.00200732	9.91096e-05	0.000491503	0.000222055	9.3471e-05	0	1.68197e-05	4.18158e-05
P02768	Serum albumin	(K)VFDEFKPLVEEPQNLIK(Q)	29.7	<0.1%	71362.3	5.92	0.000279523	8.01423e-05	0.000106378	0.000941598	9.38717e-05	3.92234e-05	0.000107403	4.77089e-05	0.000184786	0	5.11904e-05	2.99481e-05
P02768	Serum albumin	(K)AAFTECCQAADK(A)	27	<0.1%	71362.3	5.92	0.000107151	0	4.66742e-05	0.000936187	0.000110403	1.85005e-05	0.000104854	0	4.48107e-05	0	0	0
P02768	Serum albumin	(K)ADDKETCFAEEGKK(L)	21.93	<0.1%	71362.3	5.92	0	2.89876e-05	5.9704e-05	0.000267868	0.000586452	0.000112324	5.89804e-05	0	4.40407e-05	0	0	0
P02768	Serum albumin	(K)AVmDDFAAFVEK(C)	26.33	<0.1%	71362.3	5.92	0.000309593	4.72115e-05	0	0.00106065	0.000368009	0.000138753	0.000221723	0.000129715	0.000338775	0	0	0
P02768	Serum albumin	(K)FQNALLVR(Y)	18.67	<0.1%	71362.3	5.92	0.000216419	3.78331e-05	0.000289769	0.00211589	3.83752e-06	0.000120734	0.000291989	9.28894e-05	6.17494e-05	0	0	0
P02768	Serum albumin	(K)KVPQVSTPTLVEVSR(N)	23.33	<0.1%	71362.3	5.92	0.000270206	3.93251e-05	0.000113185	0.00221871	0.00125753	0.000445693	0.000189684	0.00021436	0.000126117	0	0	0
P02768	Serum albumin	(K)LVAASQAALGL(-)	17.5	<0.1%	71362.3	5.92	0.000361263	8.63235e-06	6.88444e-05	0.000898306	1.81052e-05	8.2291e-05	0.000167111	0	2.741e-05	0	0	0
P02768	Serum albumin	(K)QNCELFEQLGEYK(F)	25.18	<0.1%	71362.3	5.92	4.36226e-05	0.000166253	0.000373393	0.000253257	2.30251e-05	0.00111123	0.000116869	0	0.000252541	0	0	0
P02768	Serum albumin	(K)QTALVELVK(H)	19.96	<0.1%	71362.3	5.92	0.000341781	0.000133215	0.000340333	0.00106606	0.000122407	1.94615e-05	0.000225727	8.40951e-05	2.87958e-05	0	0	0
P02768	Serum albumin	(K)TCVADESAENCDK(S)	21.15	<0.1%	71362.3	5.92	7.83512e-05	1.40675e-05	3.16995e-05	0.000557383	0.00058842	1.12324e-05	3.11285e-05	0	2.29443e-05	0	0	0
P02768	Serum albumin	(K)YICENQDSISSK(L)	25.58	<0.1%	71362.3	5.92	0.000124515	0	7.48732e-05	0.00121217	0.000102924	6.96771e-05	0.00015	2.16559e-05	5.99015e-05	0	0	0
P02768	Serum albumin	(R)LVRPEVDVMCTAFHDNEETFLKK(Y)	21.88	<0.1%	71362.3	5.92	0.000212607	0.000128952	0.000180279	0.000633144	0.000180659	0.000110522	1.09223e-05	0	0.000251001	0	0	0
P02768	Serum albumin	(R)RPCFSALEVDETYVPK(E)	21.22	<0.1%	71362.3	5.92	0.000282064	5.69096e-05	0.000252818	0.00106606	0.000924941	6.18684e-05	0.000122694	8.24462e-05	0.000127194	0	0	0
P02768	Serum albumin	(K)ALVLIAFAQYLQQCPFEDHVK(L)	25.22	<0.1%	71362.3	5.92	0.000170679	3.93251e-05	7.17615e-05	0	0.000364073	1.69387e-05	0	0	0	0	0	0
P02768	Serum albumin	(K)DDNPNLPR(L)	17.4	<0.1%	71362.3	5.92	0.000106304	0	4.88134e-05	0.000714316	0.000120439	3.27362e-05	0	0	0	0	0	0
P02768	Serum albumin	(K)EFNAETFTFHADICTLSEK(E)	28.5	<0.1%	71362.3	5.92	0	0.000410303	0.000223647	6.60201e-05	0.000486086	2.10833e-05	0	0	0	0	0	0
P02768	Serum albumin	(K)LCTVATLR(E)	16.58	<0.1%	71362.3	5.92	6.60691e-05	0	6.68996e-05	0.000622321	8.56063e-05	2.41467e-05	0	0	0	0	0	0
P02768	Serum albumin	(K)LDELRDEGK(A)	19.69	<0.1%	71362.3	5.92	0.000105457	6.08527e-06	2.68376e-05	0.000871249	0.000728145	0.000182001	0	0	0	0	0	0
P02768	Serum albumin	(K)LVTDLTK(V)	16.76	<0.1%	71362.3	5.92	9.35979e-05	0	6.80665e-05	0.000979479	0	2.6189e-05	0	0	0	0	0	0
P02768	Serum albumin	(K)RMPCAEDYLSVVLNQLCVLHEK(T)	26.22	<0.1%	71362.3	5.92	0	8.13146e-05	8.7903e-05	0	0.000651395	4.57706e-05	0	0	0	0	0	0
P02768	Serum albumin	(K)SHCIAEVENDEMPADLPSLAADFVESK(D)	23.75	<0.1%	71362.3	5.92	0.000102915	5.29664e-05	0.00035978	0.00135287	0.000545125	2.16239e-05	0	0	0	0	0	0
P02768	Serum albumin	(K)SLHTLFGDK(L)	21.84	<0.1%	71362.3	5.92	0.000145691	1.46004e-05	8.7903e-05	0.000449153	0.000261739	0.000211434	0	0	0	0	0	0
P02768	Serum albumin	(K)VHTECCHGDLLECADDRADLAK(Y)	17.02	<0.1%	71362.3	5.92	0.000136373	0	0.00019642	0.00153686	0.000195615	2.27051e-05	0	0	0	0	0	0
P02768	Serum albumin	(K)YLYEIAR(R)	18.06	<0.1%	71362.3	5.92	9.57155e-05	1.74778e-05	0.000109295	0.00144487	0.000247963	7.98884e-05	0	0	0	0	0	0
P02768	Serum albumin	(R)ETYGEMADCCAK(Q)	21.79	<0.1%	71362.3	5.92	0.000100798	0	3.05327e-05	0.000573617	1.22014e-05	7.20797e-06	0	0	0	0	0	0
P02768	Serum albumin	(R)LVRPEVDVMCTAFHDNEETFLK(K)	24.2	<0.1%	71362.3	5.92	0.000134679	0.000158793	0.000133021	0.000526537	0.00021254	1.11123e-05	0	0	0	0	0	0
P02768	Serum albumin	(R)MPCAEDYLSVVLNQLCVLHEK(T)	25.72	<0.1%	71362.3	5.92	0	4.92364e-05	0.000243095	0	5.1167e-05	6.06671e-05	0	0	0	0	0	0
P02768	Serum albumin	(R)RHPDYSVVLLLR(L)	19.2	<0.1%	71362.3	5.92	3.72698e-05	0	5.03692e-05	0.000152063	0.00139135	0.000156773	0	0	0	0	0	0
P02768	Serum albumin	(K)AACLLPK(L)	19.53	<0.1%	71362.3	5.92	0	0	0	0.000606086	0	4.91944e-05	0	0	0	0	0	0
P02768	Serum albumin	(K)AEFAEVSK(L)	19.65	<0.1%	71362.3	5.92	0	0	0	0.000871249	4.60503e-05	1.10522e-05	0	0	0	0	0	0
P02768	Serum albumin	(K)CCAAADPHECYAK(V)	22.2	<0.1%	71362.3	5.92	0	0	0	0	0.000144448	2.06629e-05	0	0	0	0	0	0
P02768	Serum albumin	(K)CCTESLVNR(R)	18.05	<0.1%	71362.3	5.92	0	0	0	0.000406403	9.9382e-05	3.15949e-05	0	0	0	0	0	0
P02768	Serum albumin	(K)DLGEENFK(A)	15.41	0.003	71362.3	5.92	0	0	0	0.000103359	0	1.66985e-05	0	0	0	0	0	0
P02768	Serum albumin	(K)ECCEKPLLEK(S)	21.11	<0.1%	71362.3	5.92	0	0	0	0	0.000121226	0.000102714	0	0	0	0	0	0
P02768	Serum albumin	(K)KLVAASQAALGL(-)	15.86	0.006	71362.3	5.92	0	0	0	0	8.14736e-05	3.32167e-05	0	0	0	0	0	0
P02768	Serum albumin	(K)KQTALVELVK(H)	18.48	<0.1%	71362.3	5.92	0	0	0	0.000352829	0.000373912	0.000118331	0	0	0	0	0	0
P02768	Serum albumin	(K)LKECCEKPLLEK(S)	21.22	<0.1%	71362.3	5.92	0	0	0	0.000963244	0.000154485	0.000101512	0	0	0	0	0	0
P02768	Serum albumin	(K)SEVAHR(F)	15.69	0.006	71362.3	5.92	0	0	0	0	0.00010194	3.49587e-05	0	0	0	0	0	0
P02768	Serum albumin	(K)TYETTLEK(C)	16.03	<0.1%	71362.3	5.92	0	0	0	0.000703493	0	1.67585e-05	0	0	0	0	0	0
P02768	Serum albumin	(K)VHTECCHGDLLECADDR(A)	24.56	<0.1%	71362.3	5.92	0	0	0	0.000267868	6.23843e-05	8.7697e-05	0	0	0	0	0	0
P02768	Serum albumin	(K)VPQVSTPTLVEVSR(N)	23.45	<0.1%	71362.3	5.92	0	0	0	0.000233235	0.00050183	0.00010812	0	0	0	0	0	0
P02768	Serum albumin	(R)FKDLGEENFK(A)	20.9	<0.1%	71362.3	5.92	0	0	0	0.000719727	0.000525445	0.000132747	0	0	0	0	0	0
P02768	Serum albumin	(R)HPDYSVVLLLR(L)	19.71	<0.1%	71362.3	5.92	0	0	0	0	0.000539221	4.18663e-05	0	0	0	0	0	0
P02774	Vitamin D-binding protein	(K)EVVSLTEACCAEGADPDCYDTR(T)	27.27	<0.1%	54560.2	5.4	0	0	0	0	0	0	0	0	0	0	6.62011e-05	4.73913e-05
P02774	Vitamin D-binding protein	(K)SLGECCDVEDSTTCFNAK(G)	21.26	<0.1%	54560.2	5.4	0	0	0	0	0	0	0	0	0	0	3.17534e-05	5.61527e-05
P02774	Vitamin D-binding protein	(R)KFPSGTFEQVSQLVK(E)	18.7	<0.1%	54560.2	5.4	0	0	0	0	0	0	0	0	0	0	8.83322e-06	4.14176e-05
P02774	Vitamin D-binding protein	(R)THLPEVFLSK(V)	17.69	<0.1%	54560.2	5.4	0	0	0	0	0	0	0	0	0	0	0.000143372	0.000133811
P02787	Serotransferrin	(K)SVIPSDGPSVACVK(K)	23.94	<0.1%	79344.7	6.86	1.38068e-05	4.44406e-06	3.13106e-05	9.52421e-05	0.000166883	2.46873e-05	0	0	0	0.000203493	0.000548468	0.000216646
P02787	Serotransferrin	(R)FDEFFSEGCAPGSK(K)	27	<0.1%	79344.7	6.86	0	6.56485e-07	7.81792e-07	2.83562e-05	0.000151336	9.4905e-05	0	0	0	4.45774e-05	0.00185325	0.000244921
P02787	Serotransferrin	(K)CSTSSLLEACTFR(R)	23.89	<0.1%	79344.7	6.86	0	0	0	0	4.23111e-05	1.63381e-05	0	0	0	0	0.000779402	0.000185583
P02787	Serotransferrin	(K)DSGFQMNQLR(G)	23.55	<0.1%	79344.7	6.86	0	0	0	0	3.97528e-05	3.24959e-05	0	0	0	6.20623e-05	0.000141062	0.000101155
P02787	Serotransferrin	(K)EDPQTFYYAVAVVK(K)	22.67	<0.1%	79344.7	6.86	0	0	0	0	0.000138151	5.12967e-05	0	0	0	0	0.00180129	0.000187574
P02787	Serotransferrin	(K)EFQLFSSPHGK(D)	21.69	<0.1%	79344.7	6.86	0	0	0	0	0.000114142	2.78108e-05	0	0	0	0	0.000473415	0.000342093
P02787	Serotransferrin	(K)EGYYGYTGAFR(C)	20.74	<0.1%	79344.7	6.86	0	0	0	0	5.15606e-05	2.78708e-05	0	0	0	0	0.00024633	6.17281e-05
P02787	Serotransferrin	(K)HSTIFENLANK(A)	21.17	<0.1%	79344.7	6.86	0	0	0	0	8.63935e-05	5.30987e-05	0	0	0	0	0.000244405	0.000708878
P02787	Serotransferrin	(K)IECVSAETTEDCIAK(I)	25.29	<0.1%	79344.7	6.86	0	0	0	5.68206e-05	5.92356e-05	2.70299e-05	0	0	0	0.000171865	0.000348325	0.000322978
P02787	Serotransferrin	(K)LCMGSGLNLCEPNNK(E)	22.92	<0.1%	79344.7	6.86	0	0	0	0	5.03798e-05	1.49565e-05	0	0	0	0	0.000748611	9.67738e-06
P02787	Serotransferrin	(K)MYLGYEYVTAIR(N)	22.15	<0.1%	79344.7	6.86	0	0	0	0	0.000247963	3.9764e-05	0	0	0	0	0.000529224	2.19035e-05
P02787	Serotransferrin	(K)YLGEEYVK(A)	18.81	<0.1%	79344.7	6.86	0	0	0	0	4.30983e-05	3.77818e-05	0	0	0	0.000130092	5.61939e-05	9.51808e-05
P02787	Serotransferrin	(R)APNHAVVTR(K)	20.39	<0.1%	79344.7	6.86	0	0	0	0	0.000115716	1.06318e-05	0	0	0	0	0.000371419	0.000356829
P02787	Serotransferrin	(R)DQYELLCLDNTR(K)	25.13	<0.1%	79344.7	6.86	0	0	0	0	0.000125162	3.67006e-05	0	0	0	0	0.000290592	5.61527e-05
P02787	Serotransferrin	(R)EGTCPEAPTDECKPVK(W)	23.34	<0.1%	79344.7	6.86	0	0	0	0	2.91258e-05	2.58286e-05	0	0	0	0	8.19816e-05	0.000605334
P02787	Serotransferrin	(K)ADRDQYELLCLDNTR(K)	21.12	<0.1%	79344.7	6.86	0	0	0	0	0	0	0	0	0	4.52935e-05	0.000569637	0.000175627
P02787	Serotransferrin	(K)ASYLDCIR(A)	21.16	<0.1%	79344.7	6.86	0	0	0	0	0	0	0	0	0	0	1.51839e-05	6.69053e-05
P02787	Serotransferrin	(K)CDEWSVNSVGK(I)	18.18	<0.1%	79344.7	6.86	0	0	0	0	0	0	0	0	0	0	5.13828e-05	6.01352e-05
P02787	Serotransferrin	(K)DGAGDVAFVK(H)	22.09	<0.1%	79344.7	6.86	0	0	0	0	0	0	0	0	0	8.83194e-05	7.21669e-05	0.000101155
P02787	Serotransferrin	(K)DSAHGFLK(V)	19.84	<0.1%	79344.7	6.86	0	0	0	0	0	0	0	0	0	0	0.000236707	0.000379529
P02787	Serotransferrin	(K)DYELLCLDGTR(K)	23.9	<0.1%	79344.7	6.86	0	0	0	0	0	0	0	0	0	0	0.000109694	9.95615e-05
P02787	Serotransferrin	(K)EDLIWELLNQAQEHFGK(D)	26.22	<0.1%	79344.7	6.86	0	0	0	0	0	0	0	0	0	0	7.75553e-05	1.88769e-05
P02787	Serotransferrin	(K)HQTVPQNTGGK(N)	20.74	<0.1%	79344.7	6.86	0	0	0	0	0	0	0	0	0	0	0.000191483	0.000228593
P02787	Serotransferrin	(K)NLNEKDYELLCLDGTR(K)	26.53	<0.1%	79344.7	6.86	0	0	0	0	0	0	0	0	0	0	0.00048881	9.43843e-05
P02787	Serotransferrin	(K)SASDLTWDNLK(G)	23.97	<0.1%	79344.7	6.86	0	0	0	0	0	0	0	0	0	7.39973e-05	0.00123742	0.000382715
P02787	Serotransferrin	(K)SCHTAVGR(T)	15.04	0.003	79344.7	6.86	0	0	0	0	0	0	0	0	0	0	7.5246e-05	0.000244523
P02787	Serotransferrin	(K)WCALSHHER(L)	19.61	<0.1%	79344.7	6.86	0	0	0	0	0	0	0	0	0	0	0.000198218	0.000346872
P02787	Serotransferrin	(R)KPVEEYANCHLAR(A)	21.8	<0.1%	79344.7	6.86	0	0	0	0	0	0	0	0	0	0	0.000202067	0.00016567
P02787	Serotransferrin	(R)LKCDEWSVNSVGK(I)	22	<0.1%	79344.7	6.86	0	0	0	0	0	0	0	0	0	0	0.000275196	0.000166467
P02787	Serotransferrin	(R)SMGGKEDLIWELLNQAQEHFGK(D)	25.92	<0.1%	79344.7	6.86	0	0	0	0	0	0	0	0	0	0	0.000706273	9.35878e-05
P02787	Serotransferrin	(R)TAGWNIPMGLLYNK(I)	21.09	<0.1%	79344.7	6.86	0	0	0	0	0.000108238	3.27362e-05	0	0	0	0	0	0
P02787	Serotransferrin	(R)WCAVSEHEATK(C)	21.07	<0.1%	79344.7	6.86	0	0	0	0	0	0	0	0	0	0	0.000211689	0.00050179
P02790	Hemopexin	(K)NFPSPVDAAFR(Q)	23.53	<0.1%	52417.1	6.55	4.13356e-05	0.000321848	0.000188447	0	0.000389656	0.000128542	0	0	0	0	0.00031561	5.73474e-05
P02790	Hemopexin	(R)GECQAEGVLFFQGDR(E)	27.12	<0.1%	52417.1	6.55	0	0	0	0	9.52493e-05	2.72101e-05	0	0	0	0	0.000192445	3.51651e-05
P02790	Hemopexin	(K)EVGTPHGIILDSVDAAFICPGSSR(L)	19.53	<0.1%	52417.1	6.55	0	0	0	0	0	0	0	0	0	0	8.64078e-05	0.000108721
P02790	Hemopexin	(K)GGYTLVSGYPK(R)	16.04	0.006	52417.1	6.55	0	0	0	0	0	0	0	0	0	0	3.44477e-05	4.6993e-05
P02790	Hemopexin	(K)LLQDEFPGIPSPLDAAVECHR(G)	26.11	<0.1%	52417.1	6.55	0	0	0	0	0	0	0	0	0	0	0.000154918	0.000292711
P02790	Hemopexin	(K)VDGALCMEK(S)	16.08	0.006	52417.1	6.55	0	0	0	0	0	0	0	0	0	0	2.79045e-05	5.65509e-05
P02790	Hemopexin	(R)DYFMPCPGR(G)	15.32	0.008	52417.1	6.55	0	0	0	0	8.73774e-07	1.24938e-06	0	0	0	0	0	0
P04003	C4b-binding protein alpha chain	(K)EDVYVVGTVLR(Y)	20.14	<0.1%	69085.9	7.32	0	0	0	0	6.63203e-05	2.77507e-05	0.000176941	5.77123e-05	0.000155528	0	8.40985e-05	2.26602e-05
P04003	C4b-binding protein alpha chain	(R)FSAICQGDGTWSPR(T)	25.07	<0.1%	69085.9	7.32	0	0	0	0	0	0	0.000236286	5.49641e-05	0.000123499	0	5.21526e-05	4.42053e-05
P04003	C4b-binding protein alpha chain	(R)LMQCLPNPEDVK(M)	23.3	<0.1%	69085.9	7.32	0	0	0	0	0	0	0.000330946	0.000116524	0.000215584	0	0.000108924	0.000110314
P04003	C4b-binding protein alpha chain	(K)CEWETPEGCEQVLTGK(R)	25.67	<0.1%	69085.9	7.32	0	0	0	0	0	0	7.93687e-05	2.12711e-05	0.000100247	0	0	0
P04003	C4b-binding protein alpha chain	(K)LSLEIEQLELQR(D)	24.25	<0.1%	69085.9	7.32	0	0	0	0	0	0	0.000124514	3.94093e-05	0.000480444	0	0	0
P04003	C4b-binding protein alpha chain	(K)YTCLPGYVR(S)	19.66	<0.1%	69085.9	7.32	0	0	0	0	0	0	0.000206067	2.62728e-05	3.27995e-05	0	0	0
P04003	C4b-binding protein alpha chain	(R)GSSVIHCDADSK(W)	22	<0.1%	69085.9	7.32	0	0	0	0	0	0	4.33251e-05	0	7.62243e-05	0	0	0
P04003	C4b-binding protein alpha chain	(R)GVGWSHPLPQCEIVK(C)	21.97	<0.1%	69085.9	7.32	0	0	0	0	0	0	6.55338e-05	0.000128066	0.000151679	0	0	0
P04003	C4b-binding protein alpha chain	(R)WTPYQGCEALCCPEPK(L)	27.43	<0.1%	69085.9	7.32	0	0	0	0	0	0	0.000120873	0	0.000161688	0	0	0
P04004	Vitronectin	(R)DVWGIEGPIDAAFTR(I)	24.97	<0.1%	55103.4	5.55	0	0	0	0	1.77707e-05	4.09052e-06	2.84708e-05	9.23397e-05	0.000569757	0	0	0
P04004	Vitronectin	(R)FEDGVLDPDYPR(N)	20.65	<0.1%	55103.4	5.55	0	0	0	0	0	0	0.000560678	0.000100584	0.000140438	0	2.96365e-05	0.000123058
P04004	Vitronectin	(R)DWHGVPGQVDAAMAGR(I)	23.1	<0.1%	55103.4	5.55	0	0	0	0	0	0	0.000180946	5.23258e-05	0.000246382	0	0	0
P04004	Vitronectin	(R)GQYCYELDEK(A)	17.99	<0.1%	55103.4	5.55	0	0	0	0	0	0	0.000371358	3.39678e-05	1.13951e-05	0	0	0
P04004	Vitronectin	(R)SIAQYWLGCPAPGHL(-)	23	<0.1%	55103.4	5.55	0	0	0	0	0	0	9.90288e-05	0	0.000548199	0	0	0
P04114	Apolipoprotein B-100	(K)IVQILPWEQNEQVK(N)	18.1	<0.1%	516964	6.59	0	0	0	0	3.16842e-05	8.82977e-06	1.66747e-05	0	1.95565e-05	0	9.52603e-05	2.72799e-05
P04114	Apolipoprotein B-100	(K)AVSMPSFSILGSDVR(V)	24.72	<0.1%	516964	6.59	0	0	0	0	2.38123e-05	1.00912e-05	0	0	0	0	7.6978e-05	2.01114e-05
P04114	Apolipoprotein B-100	(K)IEIPLPFGGK(S)	21.06	<0.1%	516964	6.59	0	0	0	0	0	0	1.45267e-05	0	1.70927e-05	0	5.5809e-05	4.42053e-05
P04114	Apolipoprotein B-100	(K)ALVEQGFTVPEIK(T)	23.31	<0.1%	516964	6.59	0	0	0	0	0	0	0	0	0	0	5.42695e-05	2.42134e-05
P04114	Apolipoprotein B-100	(K)ESQLPTVMDFR(K)	19.29	<0.1%	516964	6.59	0	0	0	0	0	0	0	0	0	0	6.71633e-05	1.98327e-05
P04114	Apolipoprotein B-100	(K)FPEVDVLTK(Y)	18.8	<0.1%	516964	6.59	0	0	0	0	0	0	0	0	0	3.28214e-05	6.98575e-05	0
P04114	Apolipoprotein B-100	(K)IADFELPTIIVPEQTIEIPSIK(F)	16.02	<0.1%	516964	6.59	0	0	0	0	0	0	0	0	0	0	1.98218e-05	1.49342e-05
P04114	Apolipoprotein B-100	(K)IAELSATAQEIIK(S)	20.93	<0.1%	516964	6.59	0	0	0	0	0	0	0	0	0	0	7.25518e-05	4.26123e-05
P04114	Apolipoprotein B-100	(K)SPAFTDLHLR(Y)	15.47	0.02	516964	6.59	0	0	0	0	0	0	0	0	0	0	3.77192e-05	7.24808e-05
P04114	Apolipoprotein B-100	(K)SVSDGIAALDLNAVANK(I)	22.69	<0.1%	516964	6.59	0	0	0	0	0	0	0	0	0	0	7.60158e-05	3.37713e-05
P04114	Apolipoprotein B-100	(K)SVSLPSLDPASAK(I)	19.94	<0.1%	516964	6.59	0	0	0	0	0	0	0	0	0	7.34006e-05	1.25667e-05	0.00010673
P04114	Apolipoprotein B-100	(K)TEVIPPLIENR(Q)	18.76	<0.1%	516964	6.59	0	0	0	0	0	0	0	0	0	7.04168e-05	8.52531e-05	6.29229e-05
P04114	Apolipoprotein B-100	(R)GIISALLVPPETEEAK(Q)	15.04	0.003	516964	6.59	0	0	0	0	0	0	0	0	0	0	2.73272e-05	4.42053e-05
P04114	Apolipoprotein B-100	(R)ITENDIQIALDDAK(I)	23.96	<0.1%	516964	6.59	0	0	0	0	0	0	0	0	0	0	7.58233e-05	6.33211e-06
P04114	Apolipoprotein B-100	(R)TGISPLALIK(G)	19.22	<0.1%	516964	6.59	0	0	0	0	0	0	0	0	0	0	5.09979e-05	7.80562e-05
P04196	Histidine-rich glycoprotein	(K)DSPVLIDFFEDTER(Y)	23.2	<0.1%	60547.1	7.11	0	4.11369e-05	3.38388e-05	0	0	0	0	0	0	0	0	0
P04196	Histidine-rich glycoprotein	(R)ADLFYDVEALDLESPK(N)	25.32	<0.1%	60547.1	7.11	0	3.74068e-05	2.74211e-05	0	0	0	0	0	0	0	0	0
P04217	Alpha-1B-glycoprotein	(R)SGLSTGWTQLSK(L)	18.77	<0.1%	54823	5.56	0	0	0	0	0	0	0	0	0	0	0.00011489	6.53124e-05
P04217	Alpha-1B-glycoprotein	(R)TDGEGALSEPSATVTIEELAAPPPPVLMHHGESSQVLHPGNK(V)	19.39	<0.1%	54823	5.56	0	0	0	0	0	0	0	0	0	0.000176042	0	5.77457e-05
P05090	Apolipoprotein D	(R)NPNLPPETVDSLK(N)	21.28	<0.1%	21560.4	5.06	0	0	0	0	0	0	0.000109951	2.71523e-05	8.16139e-05	0	4.73415e-05	2.30186e-05
P05090	Apolipoprotein D	(K)NILTSNNIDVK(K)	17.75	<0.1%	21560.4	5.06	0	0	0	0	0	0	0.000111771	4.23224e-05	7.88421e-05	0	0	0
P05155	Plasma protease C1 inhibitor	(K)FQPTLLTLPR(I)	17.49	<0.1%	55381.4	6.09	0	2.52576e-05	5.65924e-05	0	1.30279e-05	1.24338e-05	0	0	0	0	0.000172046	7.04896e-05
P05155	Plasma protease C1 inhibitor	(K)TNLESILSYPK(D)	19.23	<0.1%	55381.4	6.09	0	1.44938e-05	7.00113e-05	0	0	0	0	0	0	0	9.58376e-05	5.73474e-05
P05155	Plasma protease C1 inhibitor	(K)VTTSQDMLSIMEK(L)	22.43	<0.1%	55381.4	6.09	0	0	0	0	3.1881e-05	2.41467e-05	0	0	0	0	0.000136059	4.06211e-05
P05155	Plasma protease C1 inhibitor	(K)GVTSVSQIFHSPDLAIR(D)	22.84	<0.1%	55381.4	6.09	0	0	0	0	0	0	0	0	0	0	9.17963e-05	4.42053e-05
P05155	Plasma protease C1 inhibitor	(R)LEDMEQALSPSVFK(A)	19.12	<0.1%	55381.4	6.09	0	0	0	0	1.53304e-05	1.92813e-05	0	0	0	0	0	0
P06727	Apolipoprotein A-IV	(K)ALVQQMEQLR(Q)	22.83	<0.1%	45398.2	5.28	0.000448931	7.21494e-05	0.00019642	0	0	0	0	5.8262e-05	0.000153527	0	0	0
P06727	Apolipoprotein A-IV	(K)LGEVNTYAGDLQK(K)	23.75	<0.1%	45398.2	5.28	0.000244795	0.000120427	0.000198365	0	0	0	0.000218082	3.3693e-05	6.79089e-05	0	0	0
P06727	Apolipoprotein A-IV	(K)LVPFATELHER(L)	22.7	<0.1%	45398.2	5.28	0.000142726	5.01955e-05	3.1894e-05	0	0	0	5.78882e-05	0	5.12782e-05	0	0	0
P06727	Apolipoprotein A-IV	(K)SLAELGGHLDQQVEEFR(R)	29.19	<0.1%	45398.2	5.28	0.000183808	0.000175844	0.000750676	0	0	0	7.17231e-05	6.65066e-05	0.000160148	0	0	0
P06727	Apolipoprotein A-IV	(R)DKVNSFFSTFK(E)	20.8	<0.1%	45398.2	5.28	0	0.000250445	0.000120186	0	0	0	6.08008e-05	0	0.000178627	0	0	0
P06727	Apolipoprotein A-IV	(R)LAPLAEDVR(G)	20.3	<0.1%	45398.2	5.28	0.00022743	6.71405e-05	6.53438e-05	0	0	0	0.0001733	4.35316e-05	1.3936e-05	0	0	0
P06727	Apolipoprotein A-IV	(R)LLPHANEVSQK(I)	18.21	<0.1%	45398.2	5.28	2.60888e-05	2.86679e-06	6.43715e-06	0	0	0	9.35677e-05	0	8.54636e-05	0	0	0
P06727	Apolipoprotein A-IV	(R)LTPYADEFK(V)	21.07	<0.1%	45398.2	5.28	0.00015882	5.87213e-05	0.000110268	0	0	0	0.000178397	5.39198e-05	5.18941e-05	0	0	0
P06727	Apolipoprotein A-IV	(R)SLAPYAQDTQEK(L)	15.06	<0.1%	45398.2	5.28	5.75987e-06	4.25223e-07	2.56708e-07	0	0	0	3.7864e-06	0	1.36588e-06	0	0	0
P06727	Apolipoprotein A-IV	(K)EAVEHLQK(S)	16.65	<0.1%	45398.2	5.28	6.52221e-05	5.48847e-05	0	0	0	0	0	0	0	0	0	0
P06727	Apolipoprotein A-IV	(K)IDQNVEELK(G)	21.37	<0.1%	45398.2	5.28	0.000251994	0	1.2427e-05	0	0	0	0	0	0	0	0	0
P06727	Apolipoprotein A-IV	(K)LGPHAGDVEGHLSFLEK(D)	22.98	<0.1%	45398.2	5.28	0.00033924	0.000447603	0	0	0	0	0	0	0	0	0	0
P06727	Apolipoprotein A-IV	(K)SELTQQLNALFQDK(L)	24.22	<0.1%	45398.2	5.28	0.000112656	0.000362345	0.000272266	0	0	0	0	0	0	0	0	0
P06727	Apolipoprotein A-IV	(K)SLAELGGHLDQQVEEFRR(R)	22.58	<0.1%	45398.2	5.28	0.000179573	0.000253642	0.000217813	0	0	0	0	0	0	0	0	0
P06727	Apolipoprotein A-IV	(K)TLSLPELEQQQEQQQEQQQEQVQMLAPLES(-)	15.82	<0.1%	45398.2	5.28	0	0.000151333	5.48422e-05	0	0	0	0	0	0	0	0	0
P06727	Apolipoprotein A-IV	(K)VNSFFSTFK(E)	18.95	<0.1%	45398.2	5.28	3.87521e-05	0.0003389	0.000159665	0	0	0	0	0	0	0	0	0
P06727	Apolipoprotein A-IV	(R)ISASAEELR(Q)	18.36	<0.1%	45398.2	5.28	0.000233783	1.0135e-05	3.6367e-05	0	0	0	0	0	0	0	0	0
P06727	Apolipoprotein A-IV	(R)LEPYADQLR(T)	19.1	<0.1%	45398.2	5.28	0.000157973	4.52932e-05	5.13416e-05	0	0	0	0	0	0	0	0	0
P08603	Complement factor H	(K)SSNLIILEEHLK(N)	20.14	<0.1%	143772	6.22	0	0	0	0	0	0	2.45752e-05	0	9.47029e-05	0	0.000105652	3.57625e-05
P08603	Complement factor H	(R)DTSCVNPPTVQNAYIVSR(Q)	20.73	<0.1%	143772	6.22	0	0	0	0	0	0	2.99635e-05	0	2.58701e-05	0	3.73343e-05	3.77537e-05
P08603	Complement factor H	(K)VSVLCQENYLIQEGEEITCK(D)	24	<0.1%	143772	6.22	0	0	0	0	0	0	0	0	0	0	7.48611e-05	3.25367e-05
P08603	Complement factor H	(R)EIMENYNIALR(W)	20.08	<0.1%	143772	6.22	0	0	0	0	0	0	5.57037e-05	0	7.992e-05	0	0	0
P0C0L4	Complement C4-A	(K)LNMGITDLQGLR(L)	23.3	<0.1%	194380	6.66	0	0	0	0	2.7945e-05	2.82312e-05	0.000363348	0.00021436	0.000254081	8.29486e-05	0.000100071	9.51808e-05
P0C0L4	Complement C4-A	(R)VTASDPLDTLGSEGALSPGGVASLLR(L)	30.75	<0.1%	194380	6.66	0	0	0	0	1.28508e-05	2.6189e-05	4.40533e-05	0	9.14692e-05	0	7.67855e-05	0.000104739
P0C0L4	Complement C4-A	(K)AEFQDALEK(L)	17.5	<0.1%	194380	6.66	0	0	0	0	0	0	0.00038228	0.000101134	0	0.000150978	0	3.52448e-05
P0C0L4	Complement C4-A	(K)GLCVATPVQLR(V)	20.68	<0.1%	194380	6.66	0	0	0	0	0	0	0	2.16559e-06	3.35695e-06	0	2.44405e-06	4.6993e-06
P0C0L4	Complement C4-A	(K)VDFTLSSER(D)	17.8	<0.1%	194380	6.66	0	0	0	0	0	0	0.000245752	3.39678e-05	3.20296e-05	0	1.68197e-05	4.34088e-05
P0C0L4	Complement C4-A	(K)YVLPNFEVK(I)	20.64	<0.1%	194380	6.66	0	0	0	0	0	0	0.000308009	0.000186328	0.000169387	7.22071e-05	3.23308e-05	9.00036e-05
P0C0L4	Complement C4-A	(R)FGLLDEDGKK(T)	21.46	<0.1%	194380	6.66	0	0	0	0	0	0	0.000436892	0.000143456	1.77087e-05	0.000118157	0	7.4472e-05
P0C0L4	Complement C4-A	(R)GQIVFMNR(E)	16.09	0.006	194380	6.66	0	0	0	0	0	0	0.000198786	8.5744e-05	2.54081e-05	7.69811e-05	0	3.19792e-05
P0C0L4	Complement C4-A	(R)LLATLCSAEVCQCAEGK(C)	27.5	<0.1%	194380	6.66	0	0	0	0	0	0	0.000256674	0.000118173	0.000147983	0	0.000104883	0.000155714
P0C0L4	Complement C4-A	(R)LTVAAPPSGGPGFLSIERPDSRPPR(V)	21.9	<0.1%	194380	6.66	0	0	0	0	0	0	0.000462377	0.000283615	0.000307977	0	7.005e-05	5.3365e-05
P0C0L4	Complement C4-A	(R)TTNIQGINLLFSSR(R)	25.24	<0.1%	194380	6.66	0	0	0	0	0	0	0.000197694	0.000161045	0.000451186	0	0.000109116	5.0179e-05
P0C0L4	Complement C4-A	(R)VGDTLNLNLR(A)	21.5	<0.1%	194380	6.66	0	0	0	0	0	0	0.000346965	0.000236895	0.000134586	0.000155752	3.86814e-05	0.000227399
P0C0L4	Complement C4-A	(K)EGAIHREELVYELNPLDHR(G)	15.47	<0.1%	194380	6.66	0	0	0	0	0	0	6.48056e-05	0	0.000107022	0	0	0
P0C0L4	Complement C4-A	(K)ITQVLHFTK(D)	20.51	<0.1%	194380	6.66	0	0	0	0	0	0	0.000170752	0	2.664e-05	0	0	0
P0C0L4	Complement C4-A	(K)KYVLPNFEVK(I)	17.88	<0.1%	194380	6.66	0	0	0	0	0	0	0.000230096	0.000113226	0.000107022	0	0	0
P0C0L4	Complement C4-A	(K)LELSVDGAK(Q)	16.03	<0.1%	194380	6.66	0	0	0	0	0	0	0.000170752	2.57232e-05	0	0	0	0
P0C0L4	Complement C4-A	(K)MRPSTDTITVMVENSHGLR(V)	20.95	<0.1%	194380	6.66	0	0	0	0	0	0	0.000339683	0.000146754	0.000346474	0	0	0
P0C0L4	Complement C4-A	(K)VLSLAQEQVGGSPEK(L)	24.47	<0.1%	194380	6.66	0	0	0	0	0	0	0.000120873	1.69289e-05	4.40407e-05	0	0	0
P0C0L4	Complement C4-A	(R)ALEILQEEDLIDEDDIPVR(S)	25.38	<0.1%	194380	6.66	0	0	0	0	0	0	0	0	0	0	5.52317e-05	1.51732e-05
P0C0L4	Complement C4-A	(R)DFALLSLQVPLK(D)	22.9	<0.1%	194380	6.66	0	0	0	0	0	0	4.15047e-05	0	9.3779e-05	0	0	0
P0C0L4	Complement C4-A	(R)DFALLSLQVPLKDAK(S)	19.77	<0.1%	194380	6.66	0	0	0	0	0	0	6.29852e-05	2.62728e-05	7.36065e-05	0	0	0
P0C0L4	Complement C4-A	(R)EELVYELNPLDHR(G)	23.43	<0.1%	194380	6.66	0	0	0	0	0	0	8.70143e-05	0.000155548	0.000244842	0	0	0
P0C0L4	Complement C4-A	(R)EMSGSPASGIPVK(V)	21.14	<0.1%	194380	6.66	0	0	0	0	0	0	0.000542474	0.000117623	0	0	0	0
P0C0L4	Complement C4-A	(R)GPEVQLVAHSPWLK(D)	22.9	<0.1%	194380	6.66	0	0	0	0	0	0	0.000239198	0.000203917	0.000421928	0	0	0
P0C0L4	Complement C4-A	(R)GSFEFPVGDAVSK(V)	22.4	<0.1%	194380	6.66	0	0	0	0	0	0	0.000234829	0.000147853	0.000203265	0	0	0
P0C0L4	Complement C4-A	(R)HLVPGAPFLLQALVR(E)	17.33	<0.1%	194380	6.66	0	0	0	0	0	0	0.000371358	0	0.000257161	0	0	0
P0C0L4	Complement C4-A	(R)TLEIPGNSDPNMIPDGDFNSYVR(V)	17.21	<0.1%	194380	6.66	0	0	0	0	0	0	0	0	0	0	3.56023e-05	1.66865e-05
P0C0L4	Complement C4-A	(R)TYNVLDMK(N)	17.81	<0.1%	194380	6.66	0	0	0	0	0	0	7.86405e-05	3.39129e-05	0	0	0	0
P0C0L4	Complement C4-A	(R)VDVQAGACEGK(L)	18.6	<0.1%	194380	6.66	0	0	0	0	0	0	4.98785e-05	3.63313e-05	1.3628e-05	0	0	0
P0C0L4	Complement C4-A	(R)VEYGFQVK(V)	17.18	<0.1%	194380	6.66	0	0	0	0	0	0	0.000106674	0	1.75547e-05	0	0	0
P0C0L4	Complement C4-A	(R)YIYGKPVQGVAYVR(F)	24.81	<0.1%	194380	6.66	0	0	0	0	0	0	0.000270873	1.11577e-05	0.000148137	0	0	0
P0C0L5	Complement C4-B	(K)AEMADQAAAWLTR(Q)	23.02	<0.1%	194288	6.91	0	0	0	0	0	0	3.8228e-05	0	0.000183246	0	0.000100456	2.32576e-05
P0CG05	Ig lambda-2 chain C regions	(K)AAPSVTLFPPSSEELQANK(A)	20.68	<0.1%	11464.5	6.94	0	4.15632e-05	9.62655e-05	4.64305e-05	0.000200732	6.12678e-05	0.000180946	4.2927e-06	8.83894e-05	0	0	0
P0CG05	Ig lambda-2 chain C regions	(K)AGVETTTPSK(Q)	21.2	<0.1%	11464.5	6.94	0	0	0	7.57608e-05	8.30479e-05	3.30365e-05	0	0	0	0	0	0
P10909	Clusterin	(R)ASSIIDELFQDR(F)	20.58	<0.1%	53064.2	5.89	0	2.88811e-05	6.0482e-05	0	5.90388e-05	9.19017e-06	0.000156553	3.03402e-05	0.000195565	0	0	0
P10909	Clusterin	(K)LFDSDPITVTVPVEVSR(K)	21.66	<0.1%	53064.2	5.89	0	6.77799e-05	0.000142745	0	0	0	0	0	0	0	0	0
P10909	Clusterin	(K)TLLSNLEEAK(K)	17.43	<0.1%	53064.2	5.89	0	0	0	0	0	0	0.000161286	9.45383e-05	9.88606e-05	0	0	0
P10909	Clusterin	(R)EILSVDCSTNNPSQAK(L)	20.25	<0.1%	53064.2	5.89	0	0	0	0	0	0	0.000266504	3.28136e-05	1.51987e-05	0	0	0
P10909	Clusterin	(R)IDSLLENDR(Q)	16.17	<0.1%	53064.2	5.89	0	0	0	0	0	0	0.000227184	0	1.44903e-05	0	0	0
P10909	Clusterin	(R)VTTVASHTSDSDVPSGVTEVVVK(L)	23.38	<0.1%	53064.2	5.89	0	0	0	0	0	0	0.000144902	0.000145105	0.000130274	0	0	0
P19652	Alpha-1-acid glycoprotein 2	(K)EQLGEFYEALDCLCIPR(S)	25.25	<0.1%	23887.5	5.04	0.000239712	0.000156661	0.000532863	0	0	0	0	0	0	0	0	0
P19652	Alpha-1-acid glycoprotein 2	(K)TLMFGSYLDDEK(N)	22.96	<0.1%	23887.5	5.04	5.08224e-05	0.000153464	0.000181251	0	0	0	0	0	0	0	0	0
P19652	Alpha-1-acid glycoprotein 2	(K)TLMFGSYLDDEKNWGLSFYADKPETTK(E)	20.2	<0.1%	23887.5	5.04	0	3.87923e-05	5.48422e-05	0	0	0	0	0	0	0	0	0
P19652	Alpha-1-acid glycoprotein 2	(R)SDVMYTDWK(K)	20.13	<0.1%	23887.5	5.04	0.00042352	0.000116164	0.000352001	0	0	0	0	0	0	0	0	0
P19823	Inter-alpha-trypsin inhibitor heavy chain H2	(K)IQPSGGTNINEALLR(A)	18.29	<0.1%	106918	6.4	0	0	0	0	0	0	0	0	0	0	3.94512e-05	8.32334e-05
P19823	Inter-alpha-trypsin inhibitor heavy chain H2	(R)SSALDMENFR(T)	19.52	<0.1%	106918	6.4	0	0	0	0	0	0	0	0	0	0	1.60499e-05	4.89843e-05
P19827	Inter-alpha-trypsin inhibitor heavy chain H1	(K)GSLVQASEANLQAAQDFVR(G)	27.47	<0.1%	101844	6.31	0	0	0	0	0	0	0	0	0	0	0.000160499	2.82356e-05
P19827	Inter-alpha-trypsin inhibitor heavy chain H1	(K)LDAQASFLPK(E)	16.77	0.004	101844	6.31	0	0	0	0	0	0	0	0	0	0	4.3685e-05	7.40738e-05
P25311	Zinc-alpha-2-glycoprotein	(K)AYLEEECPATLR(K)	23.97	<0.1%	34486.3	5.71	9.23274e-05	2.22736e-05	7.75958e-05	0	0	0	0	0	0	0	0	0
P25311	Zinc-alpha-2-glycoprotein	(K)EIPAWVPFDPAAQITK(Q)	20.71	<0.1%	34486.3	5.71	1.63902e-05	0.00010476	0.000114546	0	0	0	0	0	0	0	0	0
P25311	Zinc-alpha-2-glycoprotein	(R)AGEVQEPELR(G)	18.34	<0.1%	34486.3	5.71	6.14104e-05	1.7691e-06	0	0	0	0	0	0	0	0	0	0
P25311	Zinc-alpha-2-glycoprotein	(R)YSLTYIYTGLSK(H)	21.36	<0.1%	34486.3	5.71	0	2.97336e-05	9.02367e-05	0	0	0	0	0	0	0	0	0
P27169	Serum paraoxonase/arylesterase 1	(K)IFFYDSENPPASEVLR(I)	22.82	<0.1%	39901.7	5.08	0	0	0	0	0	0	8.48298e-05	0	0.000324916	0	0	0
P27169	Serum paraoxonase/arylesterase 1	(K)YVYIAELLAHK(I)	21.12	<0.1%	39901.7	5.08	0	0	0	0	0	0	0.000128883	0	0.000220204	0	0	0
P27169	Serum paraoxonase/arylesterase 1	(R)EVQPVELPNCNLVK(G)	21.98	<0.1%	39901.7	5.08	0	0	0	0	0	0	0.0002858	0.000105531	0.000198645	0	0	0
P27169	Serum paraoxonase/arylesterase 1	(R)IQNILTEEPK(V)	18.4	<0.1%	39901.7	5.08	0	0	0	0	0	0	0.000279611	4.32568e-05	6.32893e-05	0	0	0
P68871	Hemoglobin subunit beta	(K)GTFATLSELHCDK(L)	21.18	<0.1%	16112.2	6.75	0	0	0	0	0	0	0	0	0	0	1.94369e-05	0.000209079
P68871	Hemoglobin subunit beta	(K)SAVTALWGK(V)	19.59	<0.1%	16112.2	6.75	0	0	0	0	0	0	0	0	0	0	1.20663e-05	4.97808e-05
P68871	Hemoglobin subunit beta	(K)VLGAFSDGLAHLDNLK(G)	25.81	<0.1%	16112.2	6.75	0	0	0	0	0	0	0	0	0	0	1.33364e-05	1.04739e-05
P68871	Hemoglobin subunit beta	(K)VNVDEVGGEALGR(L)	21.56	<0.1%	16112.2	6.75	0	0	0	0	0	0	0	0	0	0	1.59344e-05	0.000210672
P68871	Hemoglobin subunit beta	(K)VVAGVANALAHK(Y)	23.36	<0.1%	16112.2	6.75	0	0	0	0	0	0	0	0	0	0	6.63935e-05	0.000273993
P68871	Hemoglobin subunit beta	(R)FFESFGDLSTPDAVMGNPK(V)	20.6	<0.1%	16112.2	6.75	0	0	0	0	2.87322e-05	9.00997e-06	0	0	0	0	0	0
P68871	Hemoglobin subunit beta	(R)LLVVYPWTQR(F)	17.71	<0.1%	16112.2	6.75	0	0	0	0	0	0	0	0	0	0	4.98433e-05	1.10712e-05
P69905	Hemoglobin subunit alpha	(K)KVADALTNAVAHVDDMPNALSALSDLHAHK(L)	15.72	<0.1%	15314.3	8.9	0	0	0	0	0	0	0	0	0	0	6.15824e-05	7.80562e-05
P69905	Hemoglobin subunit alpha	(K)VADALTNAVAHVDDMPNALSALSDLHAHK(L)	22.91	<0.1%	15314.3	8.9	0	0	0	0	0	0	0	0	0	0	4.15681e-05	0.000270807
P69905	Hemoglobin subunit alpha	(R)MFLSFPTTK(T)	17.92	<0.1%	15314.3	8.9	0	0	0	0	0	0	0	0	0	9.18999e-05	0.000149337	0.000196734
Abbreviations: CPLL, combinatorial peptide ligand libraries; FDR, false discovery rate; IMDP, immunodepletion; mw, molecular weight; pI, isoelectric poiint.

## Sheet: Suppl table 5
Supplementary table 5. Detailed information regarding the unique peptides present in each compartment of Venn diagram.
[Thermal]	[IMDP]	[CPLL]	[Untreated]	[Untreated] and [Thermal]	[Untreated] and [Thermal] and [IMDP]	[Untreated] and [Thermal] and [IMDP] and [CPLL]	[Thermal] and [IMDP]	[Thermal] and [IMDP] and [CPLL]	[Thermal] and [CPLL]	[Untreated] and [Thermal] and [CPLL]	[Untreated] and [CPLL]	[Untreated] and [IMDP] and [CPLL]	[Untreated] and [IMDP]	[IMDP] and [CPLL]
(K)AYLEEECPATLR(K)	(R)SASNMAIVDVK(M)	(R)SIAQYWLGCPAPGHL(-)	(K)LKECCEKPLLEK(S)	(K)LVTDLTK(V)	(K)SVIPSDGPSVACVK(K)	(K)LSPLGEEMR(D)	(K)VKSPELQAEAK(S)	(K)EHAVEGDCDFQLLK(L)	(K)ALVQQMEQLR(Q)	(K)AAFTECCQAADK(A)	(R)WLQGSQELPR(E)	(K)DNENVVNEYSSELEK(H)	(K)IWDVVEK(A)	(R)YLQEIYNSNNQK(I)
(K)VSFLSALEEYTKK(L)	(R)QPSSAFAAFVK(R)	(R)GDFSSANNR(D)	(K)AEFAEVSK(L)	(K)LDELRDEGK(A)	(K)LSITGTYDLK(S)	(K)VFDEFKPLVEEPQNLIK(Q)	(K)LREQLGPVTQEFWDNLEK(E)	(K)TVIGPDGHK(E)	(K)DSGRDYVSQFEGSALGK(Q)	(K)LVAASQAALGL(-)	(K)GPSVFPLAPCSR(S)	(R)VPVAVQGEDTVQSLTQGDGVAK(L)	(K)DTVIKPLLVEPEGLEK(E)	(R)EEAPSLRPAPPPISGGGYR(A)
(K)EAVEHLQK(S)	(R)MFLSFPTTK(T)	(R)EELVYELNPLDHR(G)	(K)AGVETTTPSK(Q)	(K)DDNPNLPR(L)	(R)FDEFFSEGCAPGSK(K)	(K)LVNEVTEFAK(T)	(K)AADDTWEPFASGK(T)	(R)LAEYHAK(A)	(R)LLPHANEVSQK(I)	(R)LVRPEVDVMCTAFHDNEETFLKK(Y)	(R)STSESTAALGCLVK(D)	(R)ILLQGTPVAQMTEDAVDAER(L)	(K)IECVSAETTEDCIAK(I)	(R)GQIVFMNR(E)
(R)AGEVQEPELR(G)	(K)DGAGDVAFVK(H)	(K)IFFYDSENPPASEVLR(I)	(K)TYETTLEK(C)	(K)EFNAETFTFHADICTLSEK(E)	(K)VTSIQDWVQK(T)	(R)DYVSQFEGSALGK(Q)	(K)SKEQLTPLIK(K)		(K)VQPYLDDFQKK(W)	(K)TCVADESAENCDK(S)	(R)TPEVTCVVVDVSHEDPEVK(F)	(K)LESDVSAQMEYCR(T)	(K)MVSGFIPLKPTVK(M)	(K)LICQATGFSPR(Q)
(K)TLMFGSYLDDEK(N)	(K)SGSDEVQVGQQR(T)	(K)QFTSSTSYNR(G)	(R)FKDLGEENFK(A)	(K)LCTVATLR(E)	(K)DTEEEDFHVDQVTTVK(V)	(K)GLIDEVNQDFTNR(I)	(K)SVLGQLGITK(V)		(K)LGEVNTYAGDLQK(K)	(K)AAPSVTLFPPSSEELQANK(A)	(K)ALPAPIEK(T)	(K)NVPLPVIAELPPK(V)	(R)IPIEDGSGEVVLSR(K)	(K)YVLPNFEVK(I)
(K)DKCEPLEK(Q)	(K)TEVIPPLIENR(Q)	(K)CEWETPEGCEQVLTGK(R)	(K)SPLFMGK(V)	(K)LQHLENELTHDIITK(F)	(K)EPCVESLVSQYFQTVTDYGK(D)	(K)AKPALEDLR(Q)	(R)VKDLATVYVDVLK(D)		(R)LAPLAEDVR(G)	(K)DSTYSLSSTLTLSK(A)	(R)DASGVTFTWTPSSGK(S)	(K)ALTDMPQMR(M)	(K)NEDSLVFVQTDK(S)	(R)AATVGSLAGQPLQER(A)
(R)SDVMYTDWK(K)	(K)SASDLTWDNLK(G)	(R)TYNVLDMK(N)	(K)AACLLPK(L)	(R)ETYGEMADCCAK(Q)	(K)NFPSPVDAAFR(Q)	(K)VSFLSALEEYTK(K)	(R)EVPLNTIIFMGR(V)		(K)SLAELGGHLDQQVEEFR(R)	(-)TVAAPSVFIFPPSDEQLK(S)	(K)VSVFVPPR(D)	(K)VAQLEAQCQEPCKDTVQIHDITGK(D)	(K)AIGYLNTGYQR(Q)	(R)SILENLR(S)
(K)VNSFFSTFK(E)	(K)SVSLPSLDPASAK(I)	(R)AKLEEQAQQIR(L)	(K)TTPPVLDSDGSFFLYSK(L)	(R)LVRPEVDVMCTAFHDNEETFLK(K)	(K)GTEAAGAMFLEAIPMSIPPEVK(F)	(R)THLAPYSDELR(Q)	(R)TEGDGVYTLNNEK(Q)		(R)LTPYADEFK(V)	(K)ADDKETCFAEEGKK(L)	(K)NYCGLPGEYWLGNDK(I)	(K)MKPVPDLVPGNFK(S)	(R)GECQAEGVLFFQGDR(E)	(R)MELERPGGNEITR(G)
(K)NWGLSVYADKPETTK(E)	(R)TVAACNLPIVR(G)	(R)GVGWSHPLPQCEIVK(C)	(K)CCTESLVNR(R)	(K)SLHTLFGDK(L)	(K)EQLGEFYEALDCLR(I)	(K)DLATVYVDVLK(D)	(R)EQLGPVTQEFWDNLEKETEGLR(Q)		(K)LVPFATELHER(L)	(K)QNCELFEQLGEYK(F)	(R)KGGETSEMYLIQPDSSVKPYR(V)	(K)YVTSAPMPEPQAPGR(Y)	(K)DIASGLIGPLIICK(K)	(K)VQHIQLLQK(N)
(R)FVYHLSDLCK(K)	(K)GQGTLSVVTMYHAK(A)	(K)EGAIHREELVYELNPLDHR(G)	(R)EPQVYTLPPSRDELTK(N)	(K)VHTECCHGDLLECADDRADLAK(Y)	(K)DIAPTLTLYVGK(K)	(R)QGLLPVLESFK(V)	(K)TEDTIFLR(E)		(R)SLAPYAQDTQEK(L)	(K)KVPQVSTPTLVEVSR(N)	(R)SYSCQVTHEGSTVEK(T)	(R)TPCTVSCNIPVVSGK(E)	(K)LMNIFLK(D)	(K)SELEEQLTPVAEETR(A)
(K)LGPHAGDVEGHLSFLEK(D)	(K)GYTQQLAFR(Q)	(R)DFALLSLQVPLKDAK(S)	(K)KQTALVELVK(H)	(R)RHPDYSVVLLLR(L)	(K)VFSNGADLSGVTEEAPLK(L)	(K)LLDNWDSVTSTFSK(L)	(K)AVGDKLPECEADDGCPKPPEIAHGYVEHSVR(Y)		(R)DKVNSFFSTFK(E)	(K)FQNALLVR(Y)	(R)TATSEYQTFFNPR(T)	(K)EDVYVVGTVLR(Y)	(R)LVAYYTLIGASGQR(E)	(K)VPPEWK(A)
(R)AHVDALR(T)	(K)ADRDQYELLCLDNTR(K)	(R)GSESGIFTNTK(E)	(R)EPQVYTLPPSR(D)	(K)YLYEIAR(R)	(K)EQLQDMGLVDLFSPEK(S)	(K)ATEHLSTLSEK(A)	(K)SDVVYTDWK(K)			(K)VDNALQSGNSQESVTEQDSK(D)	(R)DVWGIEGPIDAAFTR(I)	(K)IVQILPWEQNEQVK(N)	(K)HSTIFENLANK(A)	(K)GGETSEMYLIQPDSSVKPYR(V)
(K)CYTAVVPLVYGGETK(M)	(K)FPEVDVLTK(Y)	(R)HPDEAAFFDTASTGK(T)	(K)VHTECCHGDLLECADDR(A)	(K)SHCIAEVENDEMPADLPSLAADFVESK(D)	(R)EQLGPVTQEFWDNLEK(E)	(K)VQPYLDDFQK(K)	(R)VAEGTQVLELPFK(G)			(R)RPCFSALEVDETYVPK(E)	(R)VVSVLTVLHQDWLNGK(E)	(K)YEASILTHDSSIR(Y)	(K)YVMLPVADQDQCIR(H)	(R)TSTADYAMFK(V)
(K)LREQLGPVTQEFWDNLEKETEGLR(Q)	(K)DSCVGSLVVK(S)	(R)FWDYLR(W)	(K)GLPAPIEK(T)	(K)VYACEVTHQGLSSPVTK(S)	(K)FQPTLLTLPR(I)	(K)WQEEMELYR(Q)	(K)TNLESILSYPK(D)			(K)QTALVELVK(H)		(K)LNMGITDLQGLR(L)	(K)SCAVAEYGVYVK(V)	(K)AEFQDALEK(L)
(K)IDQNVEELK(G)	(R)TEHPFTVEEFVLPK(F)	(K)GQPSVLQVVNLPIVERPVCK(D)	(K)FNWYVDGVEVHNAK(T)	(K)RMPCAEDYLSVVLNQLCVLHEK(T)	(R)VMPICLPSK(N)	(K)LHELQEK(L)				(K)AVmDDFAAFVEK(C)		(K)IRPFFPQQ(-)	(R)SLFTDLEAENDVLHCVAFAVPK(S)	(R)VGDTLNLNLR(A)
(K)EQLGEFYEALDCLCIPR(S)	(K)LPPNVVEESAR(A)	(R)EIMENYNIALR(W)	(K)VPQVSTPTLVEVSR(N)	(R)DIPMNPMCIYR(S)	(K)AVLDVFEEGTEASAATAVK(I)					(K)NQVSLTCLVK(G)		(K)DSHSLTTNIMEILR(G)	(K)LCMGSGLNLCEPNNK(E)	(R)GGSTSYGTGSETESPR(N)
(R)ISASAEELR(Q)	(K)VLLDGVQNPR(A)	(R)EMSGSPASGIPVK(V)	(K)THTCPPCPAPELLGGPSVFLFPPKPK(D)	(R)MPCAEDYLSVVLNQLCVLHEK(T)						(K)GPSVFPLAPSSK(S)		(R)SNLDEDIIAEENIVSR(S)	(K)EGYYGYTGAFR(C)	(R)DNCCILDER(F)
(K)HTLNQIDEVK(V)	(K)LSINTHPSQKPLSITVR(T)	(R)VDVQAGACEGK(L)	(K)DLGEENFK(A)	(K)ALVLIAFAQYLQQCPFEDHVK(L)						(K)YICENQDSISSK(L)		(R)VTASDPLDTLGSEGALSPGGVASLLR(L)	(K)YLGEEYVK(A)	(R)FGLLDEDGKK(T)
(K)MVETALTPDACYPD(-)	(R)TDGEGALSEPSATVTIEELAAPPPPVLMHHGESSQVLHPGNK(V)	(R)ELLESYIDGR(I)	(R)VVSVLTVVHQDWLNGK(E)	(K)TYmLAFDVNDEKNWGLSVYADKPETTK(E)						(K)STSGGTAALGCLVK(D)		(K)GAYPLSIEPIGVR(F)	(K)GSFPWQAK(M)	(K)WLPSSSPVTGYR(V)
(K)SLAELGGHLDQQVEEFRR(R)	(R)ISLPESLK(R)	(K)MLEEIMK(Y)	(K)KLVAASQAALGL(-)	(K)SGTASVVCLLNNFYPR(E)						(R)ASSIIDELFQDR(F)			(K)CSTSSLLEACTFR(R)	(K)EDGGGWWYNR(C)
(K)EIPAWVPFDPAAQITK(Q)	(R)SSGSLLNNAIK(G)	(R)KMLEEIMK(Y)	(-)EIVLTQSPGTLSLSPGER(A)	(R)YVGGQEHFAHLLILR(D)									(K)DSGFQMNQLR(G)	(K)QSGLYFIKPLK(A)
(R)LEPYADQLR(T)	(R)FISLGEACK(K)	(R)GSSVIHCDADSK(W)	(K)YAASSYLSLTPEQWK(S)	(K)WFYIASAFR(N)									(K)ITLLSALVETR(T)	(R)LTVAAPPSGGPGFLSIERPDSRPPR(V)
(K)TYMLAFDVNDEK(N)	(K)FEVQVTVPK(I)	(R)DFALLSLQVPLK(D)	(R)LLLQQVSLPELPGEYSMK(V)										(R)VGFYESDVMGR(G)	(R)KAPDAGGCLHADPDLGVLCPTGCQLQEALLQQERPIR(N)
(R)IIVPLNNR(E)	(K)GVTSVSQIFHSPDLAIR(D)	(R)NPSSAGSWNSGSSGPGSTGNR(N)	(R)LLIYAVLPTGDVIGDSAK(Y)										(K)VTTSQDMLSIMEK(L)	(R)GEVQAMLGQSTEELR(V)
(K)KWQEEMELYR(Q)	(K)EVGTPHGIILDSVDAAFICPGSSR(L)	(R)SEGSSVNLSPPLEQCVPDR(G)	(K)ALLAYAFALAGNQDK(R)										(K)DICEEQVNSLPGSITK(A)	(R)QDGSVDFGR(K)
(R)HTFMGVVSLGSPSGEVSHPR(K)	(K)EDLIWELLNQAQEHFGK(D)	(R)GQYCYELDEK(A)	(R)HPDYSVVLLLR(L)										(K)TIYTPGSTVLYR(I)	(K)IEIPLPFGGK(S)
(K)AVLTIDEK(G)	(R)SMGGKEDLIWELLNQAQEHFGK(D)	(R)HLVPGAPFLLQALVR(E)	(K)TTPPMLDSDGSFFLYSK(L)										(R)EGTCPEAPTDECKPVK(W)	(K)FQSVFTVTR(Q)
(K)SELTQQLNALFQDK(L)	(K)SVSDGIAALDLNAVANK(I)	(R)SGIECQLWR(S)	(R)SLDFTELDVAAEK(I)										(K)DFDFVPPVVR(W)	(R)FSAICQGDGTWSPR(T)
(K)DLLLPQPDLR(Y)	(R)ITENDIQIALDDAK(I)	(K)ESSSHHPGIAEFPSR(G)	(K)ANPTVTLFPPSSEELQANK(A)										(R)VTAAPQSVCALR(A)	(R)NPNLPPETVDSLK(N)
(K)LFDSDPITVTVPVEVSR(K)	(K)SCHTAVGR(T)	(K)MRPSTDTITVMVENSHGLR(V)	(R)EVVADSVWVDVK(D)										(K)ATVLNYLPK(C)	(K)IHLISTQSAIPYALR(V)
(K)TFPGFFSPMLGEFVSETESR(G)	(K)VSVLCQENYLIQEGEEITCK(D)	(R)GDACEGDSGGPFVMK(S)	(K)TTPPVLDSDGSFFLYSR(L)										(K)MYLGYEYVTAIR(N)	(K)DSDWPFCSDEDWNYK(C)
(K)LYHSEAFTVNFGDTEEAKK(Q)	(K)IAELSATAQEIIK(S)	(R)NLQPASEYTVSLVAIK(G)	(R)LYGSEAFATDFQDSAAAK(K)										(K)AVSMPSFSILGSDVR(V)	(K)EVGPTNADPVCLAK(M)
(R)AQLVPLPPSTYVEFTVSGTDCVAK(E)	(R)SASLHLPK(L)	(R)EESPLLIGQQSTVSDVPR(D)	(R)FFESFGDLSTPDAVMGNPK(V)										(R)TVMVNIENPEGIPVK(Q)	(R)DTSCVNPPTVQNAYIVSR(Q)
(K)ITPNLAEFAFSLYR(Q)	(R)IHWESASLLR(S)	(R)EVQPVELPNCNLVK(G)	(R)NFPPSQDASGDLYTTSSQLTLPATQCLAGK(S)										(R)EIGELYLPK(F)	(K)AIQLTYNPDESSKPNMIDAATLK(S)
(K)SGNTFRPEVHLLPPPSEELALNELVTLTCLAR(G)	(K)ESQLPTVMDFR(K)	(R)IQNILTEEPK(V)	(K)VDNALQSGNSQESVTEQDSKDSTYSLSSTLTLSK(A)										(R)VSVQLEASPAFLAVPVEK(E)	(R)FEDGVLDPDYPR(N)
(K)LPECEADDGCPKPPEIAHGYVEHSVR(Y)	(K)VVAGVANALAHK(Y)	(R)YIYGKPVQGVAYVR(F)	(K)KLSSWVLLMK(Y)										(K)SSLSVPYVIVPLK(T)	(K)HQLYIDETVNSNIPTNLR(V)
(K)DSPVLIDFFEDTER(Y)	(K)HYDGSYSTFGER(Y)	(K)REEAPSLRPAPPPISGGGYR(A)	(K)SAVQGPPER(D)										(K)EDPQTFYYAVAVVK(K)	(R)LTIGEGQQHHLGGAK(Q)
(R)VKDLATVYVDVLKDSGR(D)	(K)EVVSLTEACCAEGADPDCYDTR(T)	(R)FDHVITNMNNNYEPR(S)	(R)IAQWQSFQLEGGLK(Q)										(R)DQYELLCLDNTR(K)	(R)TTNIQGINLLFSSR(R)
(K)TLMFGSYLDDEKNWGLSFYADKPETTK(E)	(K)QQNAQGGFSSTQDTVVALHALSK(Y)	(K)YTCLPGYVR(S)	(K)VLSALQAVQGLLVAQGR(A)										(K)AGDFLEANYMNLQR(S)	(R)LMQCLPNPEDVK(M)
(R)ADLFYDVEALDLESPK(N)	(K)KVADALTNAVAHVDDMPNALSALSDLHAHK(L)	(R)EILSVDCSTNNPSQAK(L)	(R)TAGWNIPMGLLYNK(I)										(R)APNHAVVTR(K)	(R)EVDLKDYEDQQK(Q)
(R)YSLTYIYTGLSK(H)	(R)TGISPLALIK(G)	(R)LAVTTHGLPCLAWASAQAK(A)	(R)LEDMEQALSPSVFK(A)										(K)EFQLFSSPHGK(D)	(K)VDFTLSSER(D)
(R)GSPAINVAVHVFR(K)	(K)VDLSFSPSQSLPASHAHLR(V)	(R)FNAVLTNPQGDYDTSTGK(F)	(R)WQQGNVFSCSVMHEALHNHYTQK(S)											(K)SSNLIILEEHLK(N)
(R)TLDLGENQLETLPPDLLR(G)	(R)HYEGSTVPEKK(T)	(R)ITYGETGGNSPVQEFTVPGSK(S)	(K)CCAAADPHECYAK(V)											(K)QGFGNVATNTDGK(N)
(K)TSESGELHGLTTEEEFVEGIYKVEIDTK(S)	(R)ALEILQEEDLIDEDDIPVR(S)	(K)KYVLPNFEVK(I)	(R)FSGSGSGTDFTLTISR(L)											(R)LLATLCSAEVCQCAEGK(C)
(R)EQLGPVTQEFWDNLEKETEGLRQEMSK(D)	(K)ALVEQGFTVPEIK(T)	(R)GPEVQLVAHSPWLK(D)	(K)ECCEKPLLEK(S)											(K)AEMADQAAAWLTR(Q)
(K)AGTELVNFLSYFVELGTQPATQ(-)	(K)CDEWSVNSVGK(I)	(R)GSFEFPVGDAVSK(V)	(K)VFLDCCNYITELR(R)											(K)EGFGHLSPTGTTEFWLGNEK(I)
(K)TLSLPELEQQQEQQQEQQQEQVQMLAPLES(-)	(R)LLVVYPWTQR(F)	(K)SPQELLCGASLISDR(W)	(K)SEVAHR(F)											(K)VGPEADKYR(L)
(R)VAEGTQVLELPFKGDDITMVLILPKPEK(S)	(K)NLNEKDYELLCLDGTR(K)	(R)TYLGNALVCTCYGGSR(G)	(R)QEPSQGTTTFAVTSILR(V)											(K)AHYGGFTVQNEANK(Y)
(K)VWPQQPSGELFEIEIDTLETTCHVLDPTPVAR(C)	(K)SPVGVQPILNEHTFCAGMSK(Y)	(R)IDSLLENDR(Q)	(R)YYTYLIMNK(G)											(R)VELEDWNGR(T)
	(K)LDAQASFLPK(E)	(K)LEQGENVFLQATDK(N)	(R)GECVPGEQEPEPILIPR(V)											(K)GLCVATPVQLR(V)
	(R)TEVSSNHVLIYLDK(V)	(R)DWHGVPGQVDAAMAGR(I)	(R)DYFMPCPGR(G)
	(K)CLVNLIEK(V)	(R)HRHPDEAAFFDTASTGK(T)
	(K)VADALTNAVAHVDDMPNALSALSDLHAHK(L)	(K)VQAAVGTSAAPVPSDNH(-)
	(R)VGYVSGWGR(N)	(K)LELSVDGAK(Q)
	(K)IQPSGGTNINEALLR(A)	(K)ITQVLHFTK(D)
	(R)QGIPFFGQVR(L)	(R)VEYGFQVK(V)
	(K)SPAFTDLHLR(Y)	(R)LDGSVDFKK(N)
	(R)TLEIPGNSDPNMIPDGDFNSYVR(V)	(K)TLLSNLEEAK(K)
	(K)TDTSHHDQDHPTFNK(I)	(R)VTTVASHTSDSDVPSGVTEVVVK(L)
	(K)GGYTLVSGYPK(R)	(K)LAACLEGNCAEGLGTNYR(G)
	(K)SLGECCDVEDSTTCFNAK(G)	(K)HQDFNSAVQLVENFCR(N)
	(K)VDGALCMEK(S)	(K)IYIHPR(Y)
	(R)LKCDEWSVNSVGK(I)	(K)YVYIAELLAHK(I)
	(R)GIISALLVPPETEEAK(Q)	(K)VLSLAQEQVGGSPEK(L)
	(K)SIYKPGQTVK(F)	(R)WTPYQGCEALCCPEPK(L)
	(R)FLCTGGVSPYADPNTCR(G)	(K)LSLEIEQLELQR(D)
	(K)DSAHGFLK(V)	(K)NSLFEYQK(N)
	(R)KPVEEYANCHLAR(A)	(K)NILTSNNIDVK(K)
	(K)EDIPPADLSDQVPDTESETR(I)	(R)VYCDMNTENGGWTVIQNR(Q)
	(R)WCAVSEHEATK(C)	(R)NSVDELNNNVEAVSQTSSSSFQYMYLLK(D)
	(K)WCALSHHER(L)	(R)TFGSGEADCGLRPLFEK(K)
	(K)IADFELPTIIVPEQTIEIPSIK(F)	(R)KSPQELLCGASLISDR(W)
	(K)DYELLCLDGTR(K)
	(K)GTFATLSELHCDK(L)
	(K)HQTVPQNTGGK(N)
	(R)SSALDMENFR(T)
	(K)GSLVQASEANLQAAQDFVR(G)
	(R)LGMFNIQHCK(K)
	(K)VNVDEVGGEALGR(L)
	(R)DLKPAIVK(V)
	(K)LLQDEFPGIPSPLDAAVECHR(G)
	(K)ASYLDCIR(A)
	(R)VVSMDENFHPLNELIPLVYIQDPK(G)
	(R)THLPEVFLSK(V)
	(R)ILGGHLDAK(G)
	(K)FLEDVKK(L)
	(K)VLGAFSDGLAHLDNLK(G)
	(K)SAVTALWGK(V)
	(R)SGLSTGWTQLSK(L)
	(K)VYAYYNLEESCTR(F)
	(R)KFPSGTFEQVSQLVK(E)
	(R)DDLYVSDAFHK(A)
	(K)EELLPAQDIK(A)

## Sheet: Suppl table 6
Supplymentary table 6. Prediction of physical and chemical properties of 44 identified proteins in untreated and thermal conditions by ProtParam tool (https://web.expasy.org/protparam).
uniprot_id	protein name	protein_mw	protein_pI	amino acid residues	peptide_mw	peptide_pI	instability indexa	stability classification	aliphatic indexb	GRAVY indexc
Proteins which were found only in thermal treatment condition
P01591	Immunoglobulin J chain	18554.7	5.12	1-22	2522.14	10.3	-0.34	stable	137.27	1.032
				23-159	15594.5	4.59	56.48	unstable	81.75	-0.558
P02750	Leucine-rich alpha-2-glycoprotein	38405.4	6.46	1-35	3849.51	12.3	65.98	unstable	94.86	0.02
				36-347	34346.4	5.66	38.95	stable	107.24	-0.162
P02765	Alpha-2-HS-glycoprotein	40122.7	5.43	1-18	2015.52	7.85	45.65	unstable	151.67	1.233
				19-300	30238	4.53	46.06	unstable	80.6	-0.275
				301-340	4400.99	10.83	56.3	unstable	68.25	-0.61
				341-367	2740.27	10.86	37.93	stable	90	0.374
P02766	Transthyretin	16000.8	5.52	1-20	2143.63	6.5	34.93	stable	161	1.53
				21-147	13761.4	5.31	28.82	stable	73.7	-0.274
P04196	Histidine-rich glycoprotein	60547.1	7.11	1-18	1936.44	7.95	41.48	unstable	173.89	1.633
				19-525	57659.9	7.03	50.23	unstable	49.19	-1.049
P06727	Apolipoprotein A-IV	45398.2	5.28	1-20	2014.54	11	1.01	stable	166	1.9
				21-396	43402.5	5.18	52.49	unstable	81.76	-0.939
P19652	Alpha-1-acid glycoprotein 2	23887.5	5.04	1-19	1969.45	4	22.28	stable	195	1.789
				20-201	21651.2	5.12	40.47	unstable	62.35	-0.816
P25311	Zinc-alpha-2-glycoprotein	34486.3	5.71	1-20	2131.79	9.5	48.02	unstable	199.5	1.925
				21-298	32144.9	5.58	56.66	unstable	67.66	-0.756
mean±SEM		34675.3±5266.0	5.71±0.25				40.19±4.24		113.43±11.61	0.333±0.26
Proteins which were found only in untreated condition
B9A064	Immunoglobulin lambda-like polypeptide 5	23405.2	9.65	1-35	3802.53	7.98	40.05	unstable	89.14	-0.174
				36-214	19278.7	9.03	68.3	unstable	64.8	-0.449
P00450	Ceruloplasmin	123059	5.44	1-19	2137.71	7.98	23.04	stable	154.21	1.789
				20-1065	120085	5.41	39.34	stable	68.76	-0.578
P00734	Prothrombin	71519	5.64	1-24	2461	7.88	37.28	stable	138.33	1.121
				25-43	2303.7	12.48	110.32	unstable	102.63	-0.6
				44-622	65308.2	5.23	38.38	stable	65.85	-0.606
P01019	Angiotensinogen	53438.5	5.87	1-33	3411.11	10.76	76.48	unstable	103.94	0.497
				34-485	49761.1	5.6	38.56	stable	99.47	0.033
P01023	Alpha-2-macroglobulin	164714	6.03	1-23	2499.14	8.37	27.97	stable	182.17	1.009
				24-1474	160810	5.98	36.51	stable	85.06	-0.214
P01024	Complement C3	188685	6.02	1-22	2214.73	6.49	27.05	stable	164.09	1.168
				23-1663	184951	6	42.68	unstable	86.85	-0.34
P01620	Ig kappa chain V-III region SIE	11889	9.11	1-20	2272.73	3.67	31.24	stable	141.5	0.8
				21-116	10302.4	6.42	49.34	unstable	69.17	-0.324
P01859	Ig gamma-2 chain C region	36527.6	8.02	1-98	10200.4	7.96	48.51	unstable	69.49	-0.045
				99-110	1363.65	6.2	81.37	unstable	24.17	-0.5
				111-219	12233	8	35.97	stable	77.52	-0.388
				220-326	12157.6	6.31	54.72	unstable	56.36	-0.783
P01861	Ig gamma-4 chain C region	36453.4	7.26	1-98	10194.5	8.92	56.1	unstable	73.47	-0.05
				99-110	1264.43	6.08	103.23	unstable	0	-1.008
				111-220	12409.2	6.96	35.77	stable	77.73	-0.437
				221-327	12126.5	5.52	57.51	unstable	63.64	-0.683
P01871	Ig mu chain C region	49990.3	6.35	1-105	11153.5	6.9	44.68	unstable	73.24	-0.277
				106-217	12320	8.94	26.1	stable	65.18	-0.414
				218-323	11590.9	5.85	36.04	stable	70.85	-0.305
				324-452	14266.1	5.29	42.92	unstable	76.28	-0.273
P02675	Fibrinogen beta chain	56611.8	8.98	1-30	3631.65	10.6	19.29	stable	133	0.747
				31-44	1569.61	4.14	32.57	stable	27.86	-1.107
				45-491	50762.9	7.95	44.04	unstable	58.88	-0.849
P02679	Fibrinogen gamma chain	52138.3	5.37	1-26	3046.64	7.98	60.82	unstable	123.85	0.958
				27-453	48483	5.24	29.07	stable	64	-0.682
P02760	Protein AMBP	39911.7	5.95	1-19	1902.38	8	57.43	unstable	180	1.847
				20-203	20846.7	6.13	43.49	unstable	74.67	-0.441
				206-352	15974	4.89	51.53	unstable	52.38	-0.341
P04003	C4b-binding protein alpha chain	69085.9	7.32	1-48	5380.55	11.74	66.16	unstable	97.71	0.158
				49-597	61670.7	6.24	43.65	unstable	61.38	-0.532
P04004	Vitronectin	55103.4	5.55	1-19	2045.64	9.5	52.05	unstable	205.79	1.979
				20-478	52278	5.47	48.11	unstable	51.87	-0.835
P04114	Apolipoprotein B-100	516964	6.59	1-27	2764.5	9.35	39.36	stable	184.81	1.37
				28-4563	512858	6.57	35.82	stable	91.73	-0.306
P0C0L4	Complement C4-A	194380	6.66	1-19	2269.73	9.5	31.89	stable	128.42	1.026
				20-675	71678.9	8.69	45.13	unstable	89.86	-0.167
				680-1446	84197.4	5.33	43.77	unstable	88.15	-0.26
				1447-1453	1069.24	12.7	353.51	unstable	0	-4.357
				1454-1744	33073.6	6.37	45.05	unstable	78.08	-0.356
P68871	Hemoglobin subunit beta	16112.2	6.75	2-147	15867.2	6.81	6.13	stable	94.11	0.001
mean±SEM		97777.1±28019.2	6.81±0.31				52.30±11.14		90.01±6.63	-0.089±0.147
Proteins which were found in both untreated and thermally treated condition
P00738	Haptoglobin	45889.1	6.13	1-19	1874.31	5.28	36.53	stable	168.33	1.867
				19-406	43349	6.13	32.75	stable	76.08	-0.527
P00739	Haptoglobin-related protein	39542.3	6.64	1-348	39029.6	6.63	32.36	stable	85.69	-0.307
P01008	Antithrombin-III	53057.9	6.32	1-32	3581.31	8.8	9.3	stable	121.56	0.812
				33-464	49039.1	5.95	40.94	unstable	81.94	-0.359
P01009	Alpha-1-antitrypsin	46906.8	5.37	1-24	2430.02	5.27	68.18	unstable	158.33	1.762
				25-418	44324.6	5.37	29.4	stable	87.11	-0.302
P01011	Alpha-1-antichymotrypsin	47821.2	5.33	1-23	2403.06	5.75	34.69	stable	148.7	1.635
				24-423	45265.8	5.32	41.71	unstable	94.38	-0.163
P01834	Ig kappa chain C region	11779.8	5.58	6-103	10821	5.58	55.47	unstable	67.55	-0.553
P01857	Ig gamma-1 chain C region	36618.7	8.92	1-98	10031.3	9.31	48.25	unstable	77.45	0.021
				99-110	1345.51	6.82	71.13	unstable	0	-1.533
				111-223	12705.6	8.17	35.58	stable	80.88	-0.425
				224-330	12077.5	6.31	54.44	unstable	63.64	-0.72
P01876	Ig alpha-1 chain C region	38509.8	6.08	6-98	9884.07	5.38	52.81	unstable	71.18	-0.165
				125-220	10095.4	6.09	40.69	unstable	73.23	-0.157
				228-330	11495.1	5.3	62.41	unstable	88.06	-0.216
P02647	Apolipoprotein A-I	30777.3	5.56	1-18	1834.25	8.5	15.43	stable	141.11	1.417
				19-267	28961.6	5.45	42.62	unstable	80.72	-0.871
P02652	Apolipoprotein A-II	11288.9	6.27	1-18	1889.38	5.75	4.73	stable	178.89	1.639
				19-100	9303.65	6.51	33.08	stable	79.63	-0.462
P02671	Fibrinogen alpha chain	95713	5.7	1-19	2113.62	8	-5.67	stable	127.89	1.632
				20-35	1536.57	3.92	22.11	stable	55	-0.431
				36-866	91358.9	5.79	42.27	unstable	51.37	-0.885
P02763	Alpha-1-acid glycoprotein 1	23739.3	4.93	1-18	1969.45	4	22.28	stable	195	1.789
				19-201	21560.1	5	38.77	stable	70.33	-0.764
P02768	Serum albumin	71362.3	5.92	1-18	2140.57	8.34	17.57	stable	108.33	1.233
				19-24	789.94	12.3	89.65	unstable	48.33	-1.15
				25-609	66472.2	5.67	38.85	stable	76.92	-0.395
P02787	Serotransferrin	79344.7	6.86	1-19	1886.45	7.83	6.71	stable	190	2.326
				20-698	75195.5	6.7	35.72	stable	70.27	-0.411
P02790	Hemopexin	52417.1	6.55	1-23	2398.95	8	48.58	unstable	148.7	1.522
				24-462	49295.4	6.43	33.09	stable	63.1	-0.537
P05155	Plasma protease C1 inhibitor	55381.4	6.09	1-22	2328.84	9.35	29.24	stable	173.18	1.127
				23-500	52843.4	5.97	33.89	stable	85.86	-0.183
P0CG05	Ig lambda-2 chain C regions	11464.5	6.94	7-101	10223.4	7.22	69.8	unstable	65.68	-0.392
P10909	Clusterin	53064.2	5.89	1-22	2450.04	5.75	2.87	stable	150.45	1.2
				23-449	50062.6	5.89	55.4	unstable	68.22	-0.761
mean±SEM		44704.3±5396.4	6.17±0.21				37.46±3.31		99.29±7.41	0.192±0.169
a instability index: <40 is stable, >40 is unstable
b aliphatic index: more positive is more thermostable
c GRAVY index: more positive is more hydropathicity
